# Supplementary material for: Sunlight-mediated [3 + 2] cycloaddition of azobenzenes with arynes: an approach toward the carbazole skeleton
Source: Royal Society of Chemistry journal article supplement (doi:10.1039/d1qo00739d), 2021-01-01

## *Supporting Information*

### **Sunlight-mediated [3+2] cycloaddition of azobenzenes with arynes: An approach to carbazole skeleton**

Wenjie Zhang,<sup>†</sup> Jiahui Bu,<sup>†</sup> Lei Wang,<sup>†,‡, §\*</sup> Pinhua Li,<sup>†</sup> and Hongji Li<sup>†,\*</sup>

<sup>†</sup> Key Laboratory of Green and Precise Synthetic Chemistry and Applications, Ministry of Education; Department of Chemistry, Huaibei Normal University, Huaibei, Anhui 235000, P. R. China; E-mail: hongjili@chnu.edu.cn

<sup>‡</sup> Advanced Research Institute and Department of Chemistry, Taizhou University, Taizhou, Zhejiang 318000, P. R. China; E-mail: leiwang88@hotmail.com

<sup>§</sup> State Key Laboratory of Organometallic Chemistry, Shanghai Institute of Organic Chemistry, Shanghai 200032, P. R. China

### *Table of Contents*

|                                                                                         |    |
|-----------------------------------------------------------------------------------------|----|
| 1. General considerations.....                                                          | 1  |
| 2. Typical procedure for the [3+2] cyclization of azobenzenes with arynes.....          | 1  |
| 3. Further optimization of the reaction conditions.....                                 | 2  |
| 4. Mechanistic studies.....                                                             | 2  |
| 5. Procedure for the gram-scale synthesis and transformation of <b>3a</b> .....         | 4  |
| 6. Characterization data of the products.....                                           | 6  |
| 7. References.....                                                                      | 23 |
| 8. <sup>1</sup> H, <sup>13</sup> C and <sup>19</sup> F NMR spectra of the products..... | 24 |
| 9. Crystallographic data for <b>3s</b> .....                                            | 60 |
| 10. DFT calculations.....                                                               | 62 |
| 11. HRMS analysis reports for new compounds.....                                        | 71 |

## 1. General considerations

All  $^1\text{H}$  NMR,  $^{13}\text{C}$  NMR and  $^{19}\text{F}$  NMR spectra were recorded on a 600 MHz Bruker FT-NMR spectrometer. All chemical shifts are given as  $\delta$  value (ppm) with reference to tetramethylsilane (TMS) as an internal standard. The peak patterns are indicated as follows: s, singlet; d, doublet; t, triplet; m, multiplet. The coupling constants,  $J$ , are reported in Hertz (Hz). High resolution mass spectroscopy data of the products were collected on an Agilent Technologies 6540 UHD Accurate-Mass Q-TOF LC/MS (ESI) and a Thermo Scientific Q Exactive HF Orbitrap-FTMS instrument. Melting points were determined in open capillary tube using WRS-1B digital melting point apparatus.

All of the starting materials, such as azobenzenes and 2-(trimethylsilyl)phenyl trifluoromethanesulfonates, were prepared according to the reported methods.<sup>1-2</sup> All the solvents were dried and freshly distilled prior to use. Products were purified by flash chromatography on silica gels, eluting with petroleum ether/ethyl acetate (3:1 to 50:1).

## 2. Typical procedure for the [3+2] cyclization of azobenzene with aryne

In a 10 mL oven-dried quartz photoreactor equipped with a magnetic stirrer bar was charged with azobenzene (**1a**, 36.4 mg, 0.20 mmol), 2-(trimethylsilyl) phenyl trifluoromethanesulfonate (**2a**, 89.5 mg, 0.30 mmol), CsF (91.1 mg, 0.60 mmol) and freshly distilled acetonitrile (1.0 mL). The reaction was stirred under sunlight for 8 h. After that, the mixture in reaction tube was detected by TLC. Then the solvent was removed under vacuum to obtain the crude product. The mixture was further purified by flash chromatography (silica gel, petroleum ether/ethyl acetate = 10:1 to 50:1), and afforded the desired product **3a** as a white solid (38.2 mg, 74% yield).

### 3. Further optimization of the reaction conditions

**Table S1: Optimization of the solvent<sup>a</sup>**

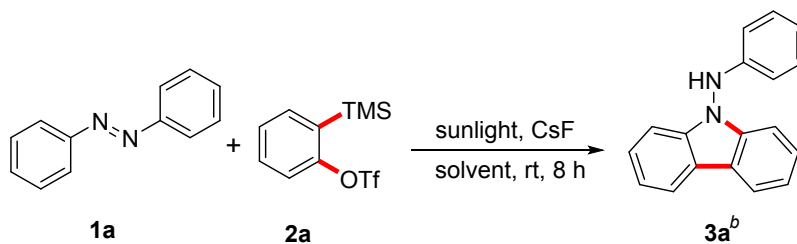

| entry | solvent | yield (%) <sup>b</sup> |
|-------|---------|------------------------|
| 1     | DCE     | 19                     |
| 2     | DCM     | 37                     |
| 3     | DMF     | trace                  |
| 4     | DMSO    | 0                      |
| 5     | THF     | 7                      |
| 6     | PhMe    | trace                  |

<sup>a</sup> Reaction conditions: **1** (0.20 mmol), **2a** (0.30 mmol) and CsF (0.60 mmol) in anhydrous CH<sub>3</sub>CN (1.0 mL) at room temperature under sunlight irradiation for 8 h. <sup>b</sup>Isolated yield.

### 4. Mechanistic studies

#### 4.1 Absorption spectra of the starting materials

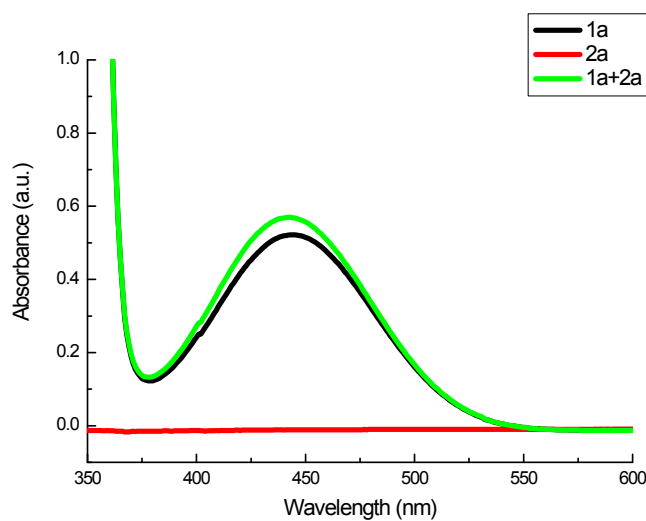

**Figure S1.** UV-vis absorption spectra of **1a** (1/128 M) and **2a** (1/85 M) in CH<sub>3</sub>CN

## 4.2 Kinetic isotope effect experiment

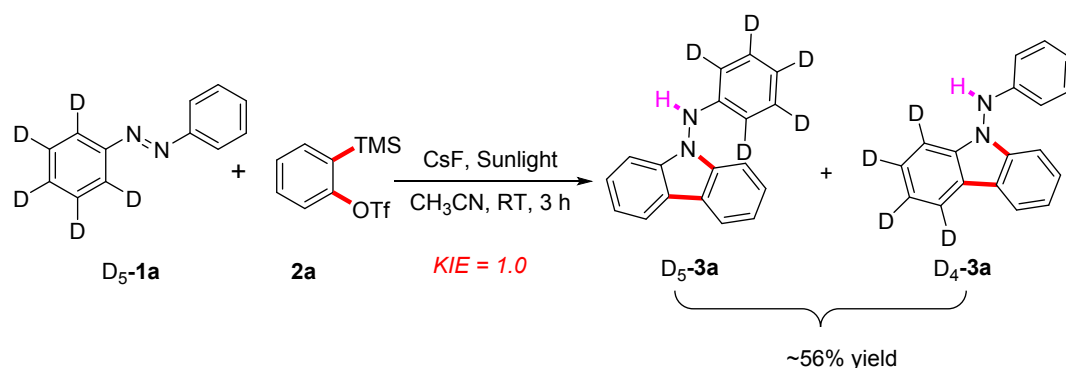

In a 10 mL oven-dried quartz photoreactor equipped with a magnetic stirrer bar was charged with azobenzene (**D<sub>5</sub>-1a**, 37.4 mg, 0.20 mmol), CsF (91.1 mg, 0.60 mmol) and 2-(trimethylsilyl)phenyl trifluoromethanesulfonate (**2a**, 89.5 mg, 0.30 mmol). Then freshly distilled Acetonitrile (1.0 mL) was added to the resulted mixture. The reaction was stirred under sunlight for 3 h. Then the solvent was removed under vacuum to obtain the crude product. The mixture was further purified by flash chromatography (silica gel, petroleum ether/ethyl acetate = 50:1), and afforded the mixed product (**D<sub>5</sub>-3a** + **D<sub>4</sub>-3a**) as a white solid (29.4 mg, 56 % yield). The KIE value (KIE = 1.0) was determined by <sup>1</sup>H NMR analysis.

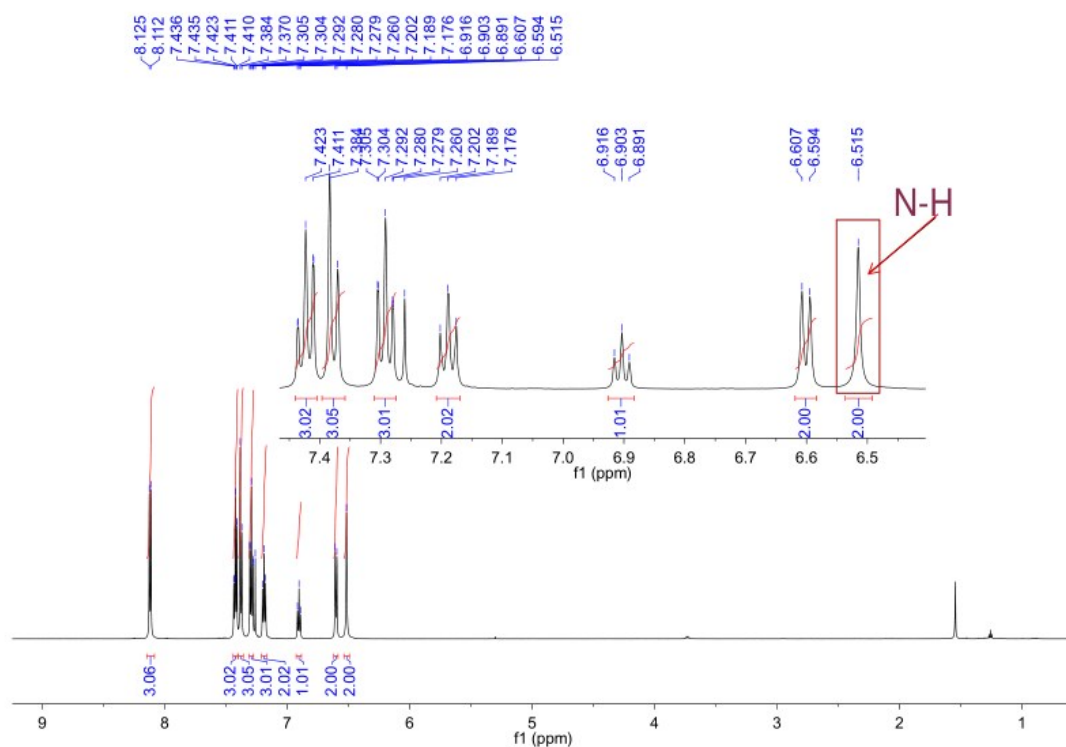

## 5. Procedure for the gram-scale synthesis and transformation of 3a

### 5.1 Gram-scale synthesis of 3a

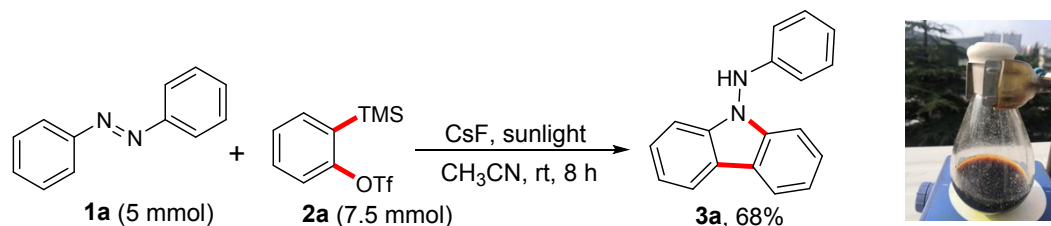

In a 100 mL oven-dried round flask equipped with a magnetic stirrer bar was charged with azobenzene (**1a**, 0.91 g, 5.0 mmol), 2-(trimethylsilyl)phenyl trifluoromethanesulfonate (**2a**, 2.23 g, 7.5 mmol), CsF (2.28 g, 15.0 mmol) and freshly distilled acetonitrile (30 mL). The reaction was stirred under sunlight for 8 h. After that, the mixture in reaction tube was detected by TLC. Then the solvent was removed under vacuum to obtain the crude product. The mixture was further purified by flash chromatography (silica gel, petroleum ether/ethyl acetate = 50:1), and afforded the desired product **3a** as a white solid (0.877 g, 68% yield).

### 5.2 The transformation of 3 into carbazole 5

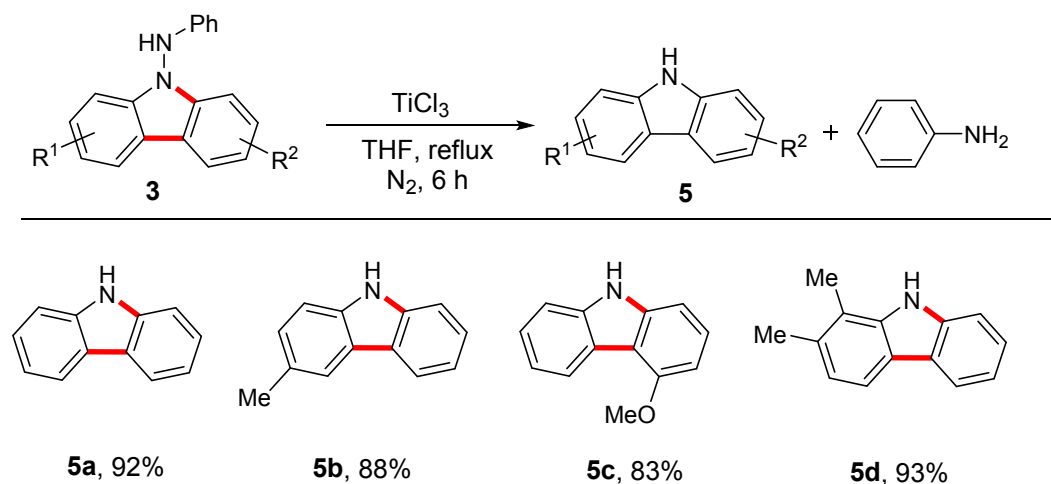

#### Typical procedure for the transformation of 3a into 5a

Compound **3a** (0.20 mmol) was dissolved in THF (0.60 mL) according to its solubility in a 10 mL oven-dried reaction tube with a magnetic stirrer bar. Then an aqueous solution of titanium (III) trichloride (0.80 mmol, 0.80 mL, 15.0–20.0%  $\text{TiCl}_3$

basis in 30% HCl) was added and the mixture was refluxed in an oil bath for 6 h under nitrogen with stirring. After cooling to room temperature, the reaction mixture was basified, while cooling in an ice-bath, with an aqueous solution of NaOH (20%) to pH >10. The residue was extracted with CH<sub>2</sub>Cl<sub>2</sub>, repeatedly.<sup>3</sup> The organic phases were combined. The solvent was evaporated and the residue was purified by flash chromatography (silica gel, petroleum ether/ethyl acetate = 20:1), and afforded carbazole **5a** as a white solid (30.7 mg, 92% yield), as well as amine was recovered after easy handling performance.

### 5.3 Typical procedure for the synthesis of 9*H*-carbazol-4-ol (**6**) from **5c**<sup>4</sup>

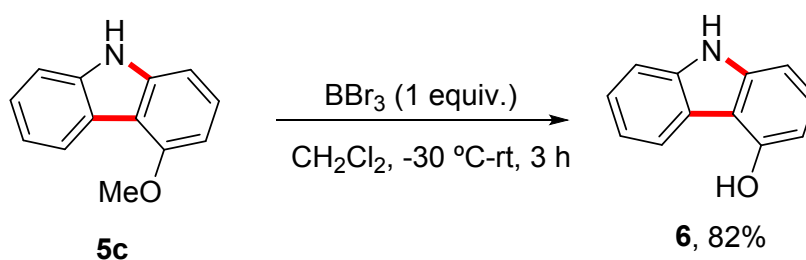

Under a N<sub>2</sub> atmosphere, the 4-methoxy-9*H*-carbazole (**5c**, 39.4 mg, 0.20 mmol), BBr<sub>3</sub> (1 equiv., 0.20 mL), and anhydrous CH<sub>2</sub>Cl<sub>2</sub> were added into a dry Schlenk tube (15 mL) at -30 °C. The resulted mixture was stirred for 3 h. After that, the mixture was allowed to warm to room temperature and quenched with water. The solvent was evaporated and the residue was further purified by flash chromatography (silica gel, petroleum ether/ethyl acetate = 10:1), affording compound **6** (30.0 mg, 82% yield) as an off-white solid.

## 6. Characterization data for the products

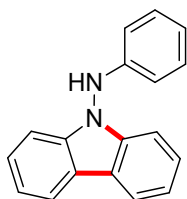

### ***N*-Phenyl-9*H*-carbazol-9-amine (3a)<sup>5</sup>**

Eluent: petroleum ether/ethyl acetate (50:1). White solid (38.2 mg, 74% yield); mp: 170–171 °C;  $R_f$  = 0.4 (petroleum ether/ethyl acetate = 20:1).  $^1\text{H}$  NMR (600 MHz,  $\text{CDCl}_3$ )  $\delta$ : 8.12 (d,  $J$  = 7.8 Hz, 2H), 7.43–7.41 (m, 2H), 7.39 (d,  $J$  = 7.8 Hz, 2H), 7.29 (t,  $J$  = 7.2 Hz, 2H), 7.19 (t,  $J$  = 8.4 Hz, 2H), 6.90 (t,  $J$  = 7.2 Hz, 1H), 6.60 (d,  $J$  = 7.8 Hz, 2H), 6.57 (s, 1H);  $^{13}\text{C}$  NMR (150 MHz,  $\text{CDCl}_3$ )  $\delta$ : 146.5, 140.2, 129.50, 126.2, 121.4, 121.1, 120.4, 120.2, 112.7, 109.1. HRMS (ESI)  $[\text{M}+\text{H}]^+$  Calcd for  $\text{C}_{18}\text{H}_{15}\text{N}_2$  259.1230; Found 259.1232.

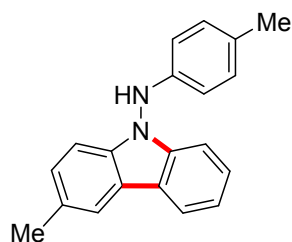

### **3-Methyl-*N*-(*p*-tolyl)-9*H*-carbazol-9-amine (3b)**

Eluent: petroleum ether/ethyl acetate (50:1). White solid (45.7 mg, 80% yield); mp: 167–168 °C;  $R_f$  = 0.4 (petroleum ether/ethyl acetate = 20:1).  $^1\text{H}$  NMR (600 MHz,  $\text{DMSO}-d_6$ )  $\delta$ : 9.15 (s, 1H), 8.14 (d,  $J$  = 7.2 Hz, 1H), 7.98 (s, 1H), 7.37 (d,  $J$  = 7.2 Hz, 1H), 7.30 (d,  $J$  = 7.8 Hz, 1H), 7.22–7.20 (m, 3H), 6.91 (d,  $J$  = 7.8 Hz, 2H), 6.31 (d,  $J$  = 7.8 Hz, 2H), 2.47 (s, 3H), 2.14 (s, 3H);  $^{13}\text{C}$  NMR (150 MHz,  $\text{DMSO}-d_6$ )  $\delta$ : 145.9, 140.6, 138.6, 130.1, 129.1, 129.0, 127.8, 126.4, 121.1, 120.9, 120.83, 120.76, 120.0, 112.9, 109.5, 109.4, 21.6, 20.6. HRMS (ESI)  $m/z$ :  $[\text{M}+\text{H}]^+$  Calcd for  $\text{C}_{20}\text{H}_{19}\text{N}_2$  287.1543; Found 287.1541.

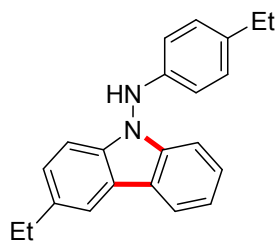

### 3-Ethyl-N-(4-ethylphenyl)-9H-carbazol-9-amine (3c)

Eluent: petroleum ether/ethyl acetate (50:1). White solid (52.1 mg, 83% yield); mp: 163–164 °C;  $R_f = 0.4$  (petroleum ether/ethyl acetate = 20:1).  $^1\text{H}$  NMR (600 MHz,  $\text{DMSO-}d_6$ )  $\delta$ : 9.19 (s, 1H), 8.16 (d,  $J = 7.8$  Hz, 1H), 8.02 (s, 1H), 7.38 (t,  $J = 7.8$  Hz, 1H), 7.33 (d,  $J = 7.8$  Hz, 1H), 7.26 (s, 2H), 7.21 (t,  $J = 7.2$  Hz, 1H), 6.94 (d,  $J = 8.4$  Hz, 2H), 6.36–6.34 (m, 2H), 2.77 (q,  $J = 7.8$  Hz, 2H), 2.46–2.42 (m, 2H), 1.28 (t,  $J = 7.8$  Hz, 3H), 1.08 (t,  $J = 7.8$  Hz, 3H);  $^{13}\text{C}$  NMR (150 MHz,  $\text{DMSO-}d_6$ )  $\delta$ : 146.1, 140.6, 138.8, 135.8, 135.5, 128.9, 126.7, 126.3, 121.0, 120.8, 119.9, 119.6, 112.8, 109.5, 109.4, 28.8, 27.8, 16.9, 16.3. HRMS (ESI)  $m/z$ :  $[\text{M}+\text{H}]^+$  Calcd for  $\text{C}_{22}\text{H}_{23}\text{N}_2$  315.1856; Found 315.1855.

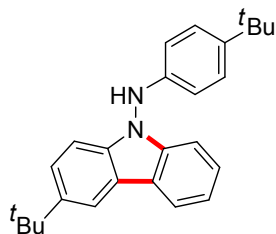

### 3-Butyl-N-(4-butylphenyl)-9H-carbazol-9-amine (3d)

Eluent: petroleum ether/ethyl acetate (50:1). White solid (59.9 mg, 81% yield); mp: 174–176 °C;  $R_f = 0.4$  (petroleum ether/ethyl acetate = 20:1).  $^1\text{H}$  NMR (600 MHz,  $\text{DMSO-}d_6$ )  $\delta$ : 9.19 (s, 1H), 8.21 (d,  $J = 7.8$  Hz, 1H), 8.20 (d,  $J = 1.8$  Hz, 1H), 7.49 (dd,  $J = 8.4, 1.8$  Hz, 1H), 7.41–7.36 (m, 1H), 7.32 (d,  $J = 8.4$  Hz, 1H), 7.26 (d,  $J = 8.4$  Hz, 1H), 7.23–7.19 (m, 1H), 7.13 (d,  $J = 9.0$  Hz, 2H), 6.34 (d,  $J = 9.0$  Hz, 2H), 1.40 (s, 9H), 1.18 (s, 9H);  $^{13}\text{C}$  NMR (150 MHz,  $\text{DMSO-}d_6$ )  $\delta$ : 145.7, 142.8, 142.4, 140.6, 138.5, 126.3, 126.2, 124.3, 121.1, 120.8, 120.7, 119.9, 117.0, 112.4, 109.4, 109.1, 34.9, 34.1, 32.3, 31.8. HRMS (ESI)  $m/z$ :  $[\text{M}+\text{H}]^+$  Calcd for  $\text{C}_{26}\text{H}_{31}\text{N}_2$  371.2482; Found 371.2483.



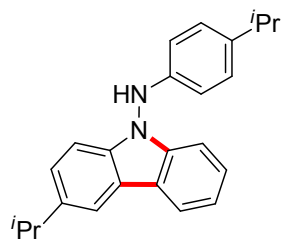

**3-iso-Propyl-N-(4-iso-propylphenyl)-9H-carbazol-9-amine (3e)**

Eluent: petroleum ether/ethyl acetate (50:1). White solid (54.0 mg, 79% yield); mp: 168–170 °C;  $R_f = 0.4$  (petroleum ether/ethyl acetate = 20:1).  $^1\text{H}$  NMR (600 MHz, acetone- $d_6$ )  $\delta$ : 8.28 (s, 1H), 8.03 (d,  $J = 7.8$  Hz, 1H), 7.92 (s, 1H), 7.26–7.23 (m, 2H), 7.18 (d,  $J = 0.6$  Hz, 2H), 7.10–7.06 (m, 1H), 6.89 (d,  $J = 8.5$  Hz, 2H), 6.36 (d,  $J = 8.5$  Hz, 2H), 3.00–2.90 (m, 1H), 2.68–2.60 (m, 1H), 1.19 (d,  $J = 6.6$  Hz, 6H), 1.01 (d,  $J = 7.2$  Hz, 6H);  $^{13}\text{C}$  NMR (150 MHz, acetone- $d_6$ )  $\delta$ : 145.8, 140.7, 140.6, 140.5, 138.9, 127.0, 125.8, 124.9, 121.2, 121.1, 120.2, 119.6, 117.5, 112.7, 109.0, 108.9, 34.1, 33.2, 24.2, 23.6. HRMS (ESI)  $m/z$ :  $[\text{M}+\text{H}]^+$  Calcd for  $\text{C}_{24}\text{H}_{27}\text{N}_2$  343.2169; Found 343.2169.

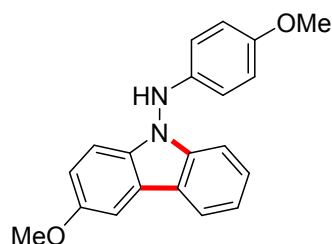

**3-Methoxy-N-(4-methoxyphenyl)-9H-carbazol-9-amine (3f)**

Eluent: petroleum ether/EtOAc (30:1). White solid (54.1 mg, 85% yield); mp: 159–161 °C;  $R_f = 0.3$  (petroleum ether/ethyl acetate = 15:1).  $^1\text{H}$  NMR (600 MHz, DMSO- $d_6$ )  $\delta$ : 9.02 (s, 1H), 8.17 (d,  $J = 7.8$  Hz, 1H), 7.77 (s, 1H), 7.38 (t,  $J = 7.8$  Hz, 1H), 7.32 (d,  $J = 8.4$  Hz, 1H), 7.25 (d,  $J = 8.4$  Hz, 1H), 7.18 (t,  $J = 7.8$  Hz, 1H), 7.05 (d,  $J = 8.4$  Hz, 1H), 6.72 (d,  $J = 8.4$  Hz, 2H), 6.38 (d,  $J = 8.4$  Hz, 2H), 3.86 (s, 3H), 3.61 (s, 3H);  $^{13}\text{C}$  NMR (150 MHz, DMSO- $d_6$ )  $\delta$ : 154.4, 153.8, 141.9, 140.9, 135.1, 126.4, 121.4, 121.1, 120.8, 119.6, 115.4, 115.1, 114.1, 110.4, 109.6, 104.1, 56.2, 55.7. HRMS (ESI)  $m/z$ :  $[\text{M}+\text{H}]^+$  Calcd for  $\text{C}_{20}\text{H}_{19}\text{N}_2\text{O}_2$  319.1441; Found 319.1442.

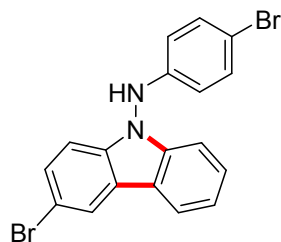

**3-Bromo-N-(4-bromophenyl)-9H-carbazol-9-amine (3g)**

Eluent: petroleum ether/ethyl acetate (30:1). White solid (63.7 mg, 77% yield); mp: 188–190 °C;  $R_f = 0.4$  (petroleum ether/ethyl acetate = 15:1).  $^1\text{H}$  NMR (600 MHz,  $\text{DMSO-}d_6$ )  $\delta$ : 9.59 (s, 1H), 8.48 (d,  $J = 1.8$  Hz, 1H), 8.27 (d,  $J = 7.8$  Hz, 1H), 7.57–7.55 (m, 1H), 7.47 (t,  $J = 7.2$  Hz, 1H), 7.35 (d,  $J = 8.4$  Hz, 1H), 7.32–7.26 (m, 4H), 6.37 (d,  $J = 9.0$  Hz, 2H);  $^{13}\text{C}$  NMR (150 MHz,  $\text{DMSO-}d_6$ )  $\delta$ : 147.1, 140.3, 138.8, 132.5, 129.2, 127.6, 123.7, 123.0, 121.7, 120.9, 120.1, 114.8, 112.6, 111.6, 111.4, 109.6. HRMS (ESI)  $m/z$ :  $[\text{M}+\text{H}]^+$  Calcd for  $\text{C}_{18}\text{H}_{13}\text{Br}_2\text{N}_2$ : 414.9440; Found 414.9439.

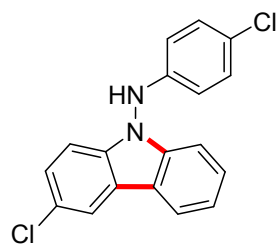

**3-Chloro-N-(4-chlorophenyl)-9H-carbazol-9-amine (3h)**

Eluent: petroleum ether/ethyl acetate (30:1). White solid (46.2 mg, 71% yield); mp: 179–181 °C;  $R_f = 0.4$  (petroleum ether/ethyl acetate = 15:1).  $^1\text{H}$  NMR (600 MHz,  $\text{DMSO-}d_6$ )  $\delta$ : 9.57 (s, 1H), 8.34 (d,  $J = 1.8$  Hz, 1H), 8.26 (d,  $J = 7.8$  Hz, 1H), 7.48–7.44 (m, 2H), 7.35 (d,  $J = 8.4$  Hz, 2H), 7.29–7.26 (m, 1H), 7.18 (d,  $J = 8.4$  Hz, 2H), 6.43–6.40 (m, 2H);  $^{13}\text{C}$  NMR (150 MHz,  $\text{DMSO-}d_6$ )  $\delta$ : 146.8, 140.5, 138.5, 129.6, 127.5, 126.5, 124.9, 124.0, 122.4, 121.7, 120.8, 120.2, 114.3, 110.9, 109.7. HRMS (ESI)  $m/z$ :  $[\text{M}+\text{H}]^+$  Calcd for  $\text{C}_{18}\text{H}_{13}\text{Cl}_2\text{N}_2$  327.0450; Found 327.0451.

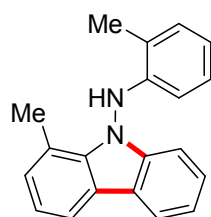

### 1-Methyl-*N*-(*o*-tolyl)-9*H*-carbazol-9-amine (3i)

Eluent: petroleum ether/ethyl acetate (50:1). White solid (38.3 mg, 67% yield); mp: 158–160 °C;  $R_f = 0.4$  (petroleum ether/ethyl acetate = 20:1).  $^1\text{H}$  NMR (600 MHz,  $\text{DMSO-}d_6$ )  $\delta$ : 8.97 (s, 1H), 8.18 (d,  $J = 7.8$  Hz, 1H), 8.08–8.01 (m, 1H), 7.39 (t,  $J = 7.8$  Hz, 1H), 7.28 (d,  $J = 8.4$  Hz, 1H), 7.23 (t,  $J = 7.2$  Hz, 1H), 7.17–7.11 (m, 3H), 6.78 (t,  $J = 7.8$  Hz, 1H), 6.66 (t,  $J = 7.2$  Hz, 1H), 5.57 (d,  $J = 5.9$  Hz, 1H), 2.49 (s, 3H), 2.39 (s, 3H);  $^{13}\text{C}$  NMR (150 MHz,  $\text{DMSO-}d_6$ )  $\delta$ : 146.6, 140.7, 138.4, 131.0, 129.0, 127.3, 126.4, 121.5, 121.2, 121.0, 120.7, 120.3, 119.4, 118.7, 110.2, 109.6, 18.0, 17.5. HRMS (ESI)  $m/z$ :  $[\text{M}+\text{H}]^+$  Calcd for  $\text{C}_{20}\text{H}_{19}\text{N}_2$  287.1543; Found 287.1542.

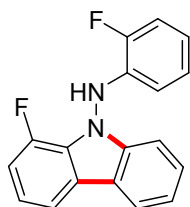

### 1-Fluoro-*N*-(2-fluorophenyl)-9*H*-carbazol-9-amine (3j)

Eluent: petroleum ether/ethyl acetate (50:1). White solid (34.6 mg, 59% yield); mp: 149–151 °C;  $R_f = 0.4$  (petroleum ether/ethyl acetate = 20:1).  $^1\text{H}$  NMR (600 MHz,  $\text{DMSO-}d_6$ )  $\delta$ : 9.56 (s, 1H), 8.24 (d,  $J = 7.8$  Hz, 1H), 8.07–8.04 (m, 1H), 7.50 (t,  $J = 7.8$  Hz, 1H), 7.44 (d,  $J = 7.8$  Hz, 1H), 7.31 (t,  $J = 7.2$  Hz, 1H), 7.25–7.21 (m, 3H), 6.84–6.77 (m, 2H), 5.97–5.92 (m, 1H);  $^{13}\text{C}$  NMR (150 MHz,  $\text{DMSO-}d_6$ )  $\delta$ : 150.5 (d,  $J = 238.4$  Hz), 148.9 (d,  $J = 243.0$  Hz), 141.2, 136.4 (d,  $J = 10.7$  Hz), 127.2 (d,  $J = 8.9$  Hz), 125.4, 121.3, 121.1, 121.1 (d,  $J = 6.2$  Hz), 120.7, 120.5 (d,  $J = 6.3$  Hz), 117.1, 115.9 (d,  $J = 17.4$  Hz), 113.4, 112.8 (d,  $J = 17.3$  Hz), 109.6.  $^{19}\text{F}$  NMR (565 MHz,  $\text{DMSO-}d_6$ )  $\delta$ : -133.1, -138.3. HRMS (ESI)  $m/z$ :  $[\text{M}+\text{H}]^+$  Calcd for  $\text{C}_{18}\text{H}_{13}\text{F}_2\text{N}_2$  295.1041; Found 295.1042.

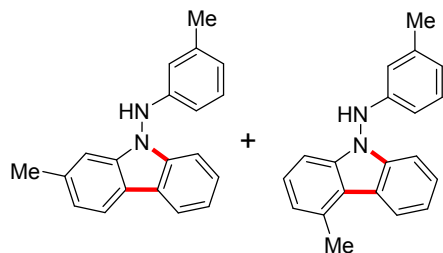

**2-Methyl-N-(*m*-tolyl)-9H-carbazol-9-amine (3k) and 4-Methyl-N-(*m*-tolyl)-9H-carbazol-9-amine (3k')**

Eluent: petroleum ether/ethyl acetate (50:1). White solid (39.8 mg, 70% yield);  $R_f = 0.4$  (petroleum ether/ethyl acetate = 20:1).  $^1\text{H NMR}$  (600 MHz,  $\text{DMSO-}d_6$ )  $\delta$ : 9.10 (d,  $J = 1.2$  Hz, 1H), 9.05 (d,  $J = 1.2$  Hz, 0.86H), 7.98 (d,  $J = 7.8$  Hz, 1H), 7.90 (d,  $J = 7.8$  Hz, 0.88H), 7.83 (d,  $J = 7.8$  Hz, 0.88H), 7.22–7.20 (m, 1H), 7.18 (d,  $J = 8.4$  Hz, 0.86H), 7.17–7.14 (m, 0.86H), 7.11–7.08 (m, 2H), 7.06–7.03 (m, 1H), 7.02–6.99 (m, 1.76H), 6.98–6.97 (m, 1H), 6.85 (d,  $J = 8.4$  Hz, 0.86H), 6.82 (d,  $J = 7.2$  Hz, 1H), 6.78–6.75 (m, 2H), 6.37 (d,  $J = 7.2$  Hz, 2H), 6.16 (s, 1.72H), 5.98 (s, 1.74H), 2.63 (s, 3H), 2.21 (s, 2.54H), 1.90 (d,  $J = 4.8$  Hz, 5.57H);  $^{13}\text{C NMR}$  (150 MHz,  $\text{DMSO-}d_6$ )  $\delta$ : 148.2, 140.8, 140.4, 140.3, 140.2, 139.0, 136.3, 133.4, 129.61, 129.58, 126.3, 126.0, 125.9, 122.8, 121.8, 121.7, 121.4, 121.2, 121.11, 121.09, 120.7, 120.6, 120.3, 120.2, 119.4, 118.7, 113.2, 113.1, 109.9, 109.8, 109.43, 109.41, 109.3, 107.2, 22.2, 21.65, 21.63, 20.8. HRMS (ESI)  $m/z$ :  $[\text{M}+\text{H}]^+$  Calcd for  $\text{C}_{20}\text{H}_{19}\text{N}_2$  287.1543; Found 287.1545.

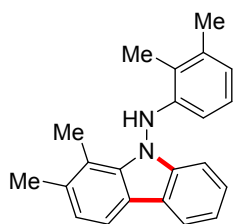

**N-(2,3-Dimethylphenyl)-1,2-dimethyl-9H-carbazol-9-amine (3l)**

Eluent: petroleum ether/ethyl acetate (50:1). White solid (40.1 mg, 64% yield); mp: 166–168 °C;  $R_f = 0.4$  (petroleum ether/ethyl acetate = 20:1).  $^1\text{H NMR}$  (600 MHz,  $\text{DMSO-}d_6$ )  $\delta$ : 8.89 (s, 1H), 8.09 (d,  $J = 7.8$  Hz, 1H), 7.90 (d,  $J = 7.8$  Hz, 1H), 7.31 (d,  $J = 7.8$  Hz, 1H), 7.18 (t,  $J = 7.8$  Hz, 2H), 7.07 (d,  $J = 7.8$  Hz, 1H), 6.65 (d,  $J = 7.8$  Hz,

1H), 6.57 (d,  $J = 7.2$  Hz, 1H), 5.45 (d,  $J = 8.4$  Hz, 1H), 2.44 (s, 3H), 2.35 (s, 3H), 2.30 (s, 3H), 2.28 (s, 3H);  $^{13}\text{C}$  NMR (150 MHz, DMSO- $d_6$ )  $\delta$ : 146.3, 141.0, 138.8, 137.2, 135.2, 126.4, 125.9, 122.9, 121.5, 121.0, 120.21, 120.17, 120.0, 119.7, 119.4, 117.8, 109.7, 108.7, 20.55, 20.52, 13.2, 12.5. HRMS (ESI)  $m/z$ :  $[\text{M}+\text{H}]^+$  Calcd for  $\text{C}_{22}\text{H}_{23}\text{N}_2$  315.1856; Found 315.1856.

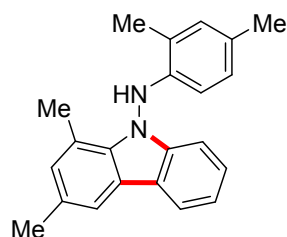

***N*-(2,4-Dimethylphenyl)-1,3-dimethyl-9*H*-carbazol-9-amine (3m)**

Eluent: petroleum ether/ethyl acetate (50:1). White solid (43.3 mg, 69% yield); mp: 157–159 °C;  $R_f = 0.4$  (petroleum ether/ethyl acetate = 20:1).  $^1\text{H}$  NMR (600 MHz, DMSO- $d_6$ )  $\delta$ : 8.77 (s, 1H), 8.11 (d,  $J = 7.8$  Hz, 1H), 7.82 (s, 1H), 7.37–7.32 (m, 1H), 7.23 (d,  $J = 7.8$  Hz, 1H), 7.21–7.16 (m, 1H), 6.95 (d,  $J = 5.4$  Hz, 2H), 6.57 (d,  $J = 8.4$  Hz, 1H), 5.44 (d,  $J = 7.8$  Hz, 1H), 2.44 (s, 3H), 2.43 (s, 3H), 2.34 (s, 3H), 2.11 (s, 3H);  $^{13}\text{C}$  NMR (150 MHz, DMSO- $d_6$ )  $\delta$ : 144.4, 141.01, 136.7, 131.7, 130.4, 129.0, 127.9, 127.5, 126.2, 121.7, 121.2, 120.8, 120.7, 120.5, 120.0, 118.4, 110.4, 109.6, 21.3, 20.5, 17.9, 17.4. HRMS (ESI)  $m/z$ :  $[\text{M}+\text{H}]^+$  Calcd for  $\text{C}_{22}\text{H}_{23}\text{N}_2$  315.1856; Found 315.1858.

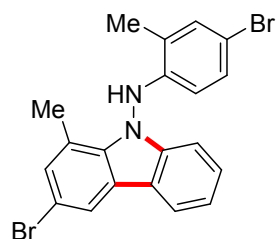

**3-Bromo-*N*-(4-bromo-2-methylphenyl)-1-methyl-9*H*-carbazol-9-amine (3n)**

Eluent: petroleum ether/ethyl acetate (40:1). White solid (56.5 mg, 64% yield); mp: 196–198 °C;  $R_f = 0.3$  (petroleum ether/ethyl acetate = 20:1).  $^1\text{H}$  NMR (600 MHz, acetone- $d_6$ )  $\delta$ : 8.42 (s, 1H), 8.20 (d,  $J = 8.4$  Hz, 2H), 7.43 (t,  $J = 7.8$  Hz, 1H), 7.38 (s, 1H), 7.32 (d,  $J = 7.2$  Hz, 2H), 7.28 (t,  $J = 7.2$  Hz, 1H), 7.03 (d,  $J = 8.4$  Hz, 1H), 5.73 (d,  $J = 8.4$  Hz, 1H), 2.57 (s, 3H), 2.50 (s, 3H);  $^{13}\text{C}$  NMR (150 MHz, acetone- $d_6$ )  $\delta$ :

146.1, 141.7, 138.1, 134.1, 131.8, 130.6, 127.8, 124.8, 124.4, 124.3, 121.7, 121.6, 121.5, 121.3, 113.3, 113.2, 112.1, 110.3, 17.5, 17.4. HRMS (ESI)  $m/z$ :  $[M+H]^+$  Calcd for  $C_{20}H_{17}Br_2N_2$  442.9753; Found 442.9758.

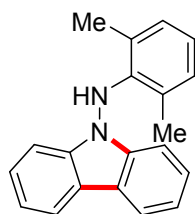

***N*-(2,6-Dimethylphenyl)-9*H*-carbazol-9-amine (3o)**

Eluent: petroleum ether/ethyl acetate (50:1). White solid (29.7 mg, 52% yield); mp: 141–143 °C;  $R_f$  = 0.4 (petroleum ether/ethyl acetate = 20:1).  $^1H$  NMR (600 MHz,  $DMSO-d_6$ )  $\delta$ : 8.33 (s, 1H), 8.17 (d,  $J$  = 7.8 Hz, 2H), 7.38 (t,  $J$  = 7.8 Hz, 2H), 7.27 (d,  $J$  = 7.8 Hz, 2H), 7.20 (t,  $J$  = 7.2 Hz, 2H), 6.95 (d,  $J$  = 7.2 Hz, 2H), 6.79 (t,  $J$  = 7.8 Hz, 1H), 1.93 (s, 6H);  $^{13}C$  NMR (150 MHz,  $DMSO-d_6$ )  $\delta$ : 143.5, 141.2, 129.9, 126.3, 126.0, 121.9, 120.9, 120.5, 119.8, 109.6, 19.2. HRMS (ESI)  $m/z$ :  $[M+H]^+$  Calcd for  $C_{20}H_{19}N_2$  287.1543; Found 287.1543.

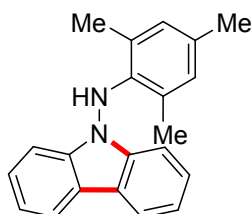

***N*-Mesityl-9*H*-carbazol-9-amine (3p)**

Eluent: petroleum ether/ethyl acetate (50:1). White solid (33.6 mg, 56% yield); mp: 132–134 °C;  $R_f$  = 0.4 (petroleum ether/ethyl acetate = 20:1).  $^1H$  NMR (600 MHz,  $DMSO-d_6$ )  $\delta$ : 8.19 (s, 1H), 8.15 (d,  $J$  = 7.8 Hz, 2H), 7.38 (t,  $J$  = 7.8 Hz, 2H), 7.27 (d,  $J$  = 8.4 Hz, 2H), 7.19 (t,  $J$  = 7.4 Hz, 2H), 6.76 (s, 2H), 2.16 (s, 3H), 1.90 (s, 6H);  $^{13}C$  NMR (150 MHz,  $DMSO-d_6$ )  $\delta$ : 141.2, 140.9, 130.6, 130.5, 126.3, 126.2, 120.8, 120.5, 119.7, 109.6, 20.5, 19.1. HRMS (ESI)  $m/z$ :  $[M+H]^+$  Calcd for  $C_{21}H_{21}N_2$  301.1699; Found 301.1699.

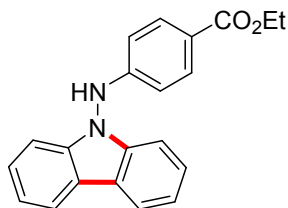

### Ethyl 4-((9*H*-carbazol-9-yl)amino)benzoate (3q)

Eluent: petroleum ether/ethyl acetate (10:1). White solid (49.5 mg, 75% yield); mp: 159–161 °C;  $R_f = 0.4$  (petroleum ether/ethyl acetate = 5:1).  $^1\text{H}$  NMR (600 MHz, DMSO- $d_6$ )  $\delta$ : 10.00 (s, 1H), 8.22 (d,  $J = 7.2$  Hz, 2H), 7.77 (d,  $J = 7.8$  Hz, 2H), 7.43 (t,  $J = 7.2$  Hz, 2H), 7.33 (d,  $J = 7.8$  Hz, 2H), 7.27 (t,  $J = 6.6$  Hz, 2H), 6.50 (s, 2H), 4.21 (d,  $J = 6.6$  Hz, 2H), 1.23 (s, 3H);  $^{13}\text{C}$  NMR (150 MHz, DMSO- $d_6$ )  $\delta$ : 166.0, 152.2, 139.8, 131.6, 126.8, 121.3, 121.2, 121.1, 120.6, 111.8, 109.3, 60.5, 14.7. HRMS (ESI)  $m/z$ :  $[\text{M}+\text{H}]^+$  Calcd for  $\text{C}_{21}\text{H}_{19}\text{N}_2\text{O}_2$  331.1441; Found 331.1437.

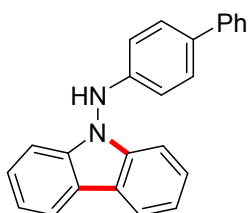

### *N*-([1,1'-Biphenyl]-4-yl)-9*H*-carbazol-9-amine (3r)

Eluent: petroleum ether/ethyl acetate (30:1). White solid (45.3 mg, 68% yield); mp: 184–186 °C;  $R_f = 0.4$  (petroleum ether/ethyl acetate = 15:1).  $^1\text{H}$  NMR (600 MHz, DMSO- $d_6$ )  $\delta$ : 9.55 (s, 1H), 8.23 (d,  $J = 7.8$  Hz, 2H), 7.52 (d,  $J = 7.8$  Hz, 2H), 7.44 (t,  $J = 7.2$  Hz, 4H), 7.40–7.36 (m, 4H), 7.28–7.23 (m, 3H), 6.50 (d,  $J = 8.4$  Hz, 2H);  $^{13}\text{C}$  NMR (150 MHz, DMSO- $d_6$ )  $\delta$ : 147.6, 140.5, 140.2, 132.3, 129.3, 128.1, 126.9, 126.7, 126.4, 121.1, 121.0, 120.4, 113.1, 109.5. HRMS (ESI)  $m/z$ :  $[\text{M}+\text{H}]^+$  Calcd for  $\text{C}_{24}\text{H}_{19}\text{N}_2$  335.1543; Found 335.1540.

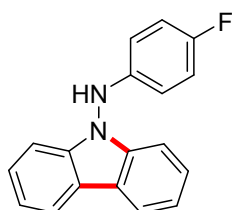

### ***N*-(4-Fluorophenyl)-9*H*-carbazol-9-amine (3s)**

Eluent: petroleum ether/ethyl acetate (50:1). White solid (34.2 mg, 62% yield); mp: 153–155 °C;  $R_f = 0.4$  (petroleum ether/ethyl acetate = 20:1).  $^1\text{H}$  NMR (600 MHz,  $\text{DMSO-}d_6$ )  $\delta$ : 9.39 (s, 1H), 8.21 (d,  $J = 7.8$  Hz, 2H), 7.44–7.42 (m, 2H), 7.36 (d,  $J = 8.4$  Hz, 2H), 7.26–7.24 (m, 2H), 6.98 (t,  $J = 9.0$  Hz, 2H), 6.45–6.42 (m, 2H);  $^{13}\text{C}$  NMR (150 MHz,  $\text{DMSO-}d_6$ )  $\delta$ : 156.9 (d,  $J = 233.2$  Hz), 144.5, 140.1, 126.6, 121.04, 120.98, 120.3, 116.3 (d,  $J = 22.5$  Hz), 114.0 (d,  $J = 7.8$  Hz), 109.5.  $^{19}\text{F}$  NMR (565 MHz,  $\text{DMSO-}d_6$ )  $\delta$ : -119.1. HRMS (ESI)  $m/z$ :  $[\text{M}+\text{H}]^+$  Calcd for  $\text{C}_{18}\text{H}_{14}\text{FN}_2$  277.1136; Found 277.1138.

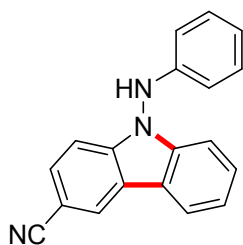

### **9-(Phenylamino)-9*H*-carbazole-3-carbonitrile (3t)**

Eluent: petroleum ether/ethyl acetate (10:1). Pale yellow solid (26.6 mg, 47% yield); mp: 176–178 °C;  $R_f = 0.5$  (petroleum ether/ethyl acetate = 5:1).  $^1\text{H}$  NMR (600 MHz,  $\text{DMSO-}d_6$ )  $\delta$ : 9.57 (s, 1H), 8.82 (s, 1H), 8.34 (d,  $J = 7.8$  Hz, 1H), 7.81 (d,  $J = 8.4$  Hz, 1H), 7.54–7.50 (m, 2H), 7.41 (d,  $J = 8.4$  Hz, 1H), 7.35 (t,  $J = 7.8$  Hz, 1H), 7.14 (t,  $J = 7.8$  Hz, 2H), 6.81 (t,  $J = 7.8$  Hz, 1H), 6.44 (d,  $J = 7.8$  Hz, 2H).  $^{13}\text{C}$  NMR (150 MHz,  $\text{DMSO-}d_6$ )  $\delta$ : 147.5, 142.2, 140.7, 129.9, 129.9, 128.1, 126.4, 121.9, 121.6, 121.2, 120.8, 120.7, 120.3, 112.8, 110.6, 110.1, 102.2. HRMS (ESI)  $m/z$ :  $[\text{M} + \text{H}]^+$  Calcd for  $\text{C}_{19}\text{H}_{14}\text{N}_3$  284.1182; Found 284.1180.

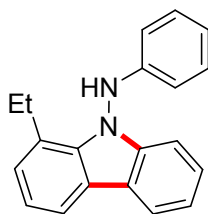

### **1-Ethyl-*N*-phenyl-9*H*-carbazol-9-amine (3u)**

Eluent: petroleum ether/ethyl acetate (50:1). White solid (37.1 mg, 65% yield); mp:



153–154 °C;  $R_f = 0.4$  (petroleum ether/ethyl acetate = 20:1).  $^1\text{H}$  NMR (600 MHz,  $\text{CDCl}_3$ )  $\delta$ : 8.07 (d,  $J = 7.8$  Hz, 1H), 7.96–7.95 (m, 1H), 7.35–7.33 (m, 1H), 7.25–7.21 (m, 4H), 7.18–7.16 (m, 2H), 6.88–6.85 (m, 1H), 6.58 (s, 1H), 6.55 (d,  $J = 7.8$  Hz, 2H), 3.05 (d,  $J = 108.6$  Hz, 2H), 1.24 (t,  $J = 7.2$  Hz, 3H);  $^{13}\text{C}$  NMR (150 MHz,  $\text{CDCl}_3$ )  $\delta$ : 147.3, 140.4, 137.9, 129.6, 127.8, 127.3, 126.0, 122.0, 121.9, 120.8, 120.5, 120.4, 120.2, 118.0, 112.4, 109.2, 24.3, 16.1. HRMS (ESI)  $m/z$ :  $[\text{M}+\text{H}]^+$  Calcd for  $\text{C}_{20}\text{H}_{19}\text{N}_2$  287.1543; Found 287.1540.

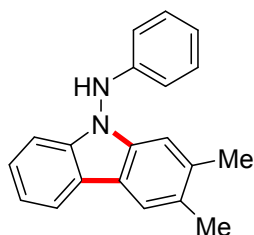

### 2, 3-Dimethyl-*N*-phenyl-9*H*-carbazol-9-amine (4a)

Eluent: petroleum ether/ethyl acetate (50:1). White solid (41.1 mg, 72% yield); mp: 181–183 °C;  $R_f = 0.4$  (petroleum ether/ethyl acetate = 20:1).  $^1\text{H}$  NMR (600 MHz,  $\text{CDCl}_3$ )  $\delta$ : 7.92 (d,  $J = 7.8$  Hz, 1H), 7.72 (s, 1H), 7.23 (t,  $J = 7.8$  Hz, 1H), 7.15–7.11 (m, 2H), 7.04 (t,  $J = 7.8$  Hz, 2H), 6.94 (s, 1H), 6.75 (t,  $J = 7.2$  Hz, 1H), 6.41 (d,  $J = 7.8$  Hz, 2H), 6.15–6.11 (m, 1H), 2.31 (s, 3H), 2.23 (s, 3H);  $^{13}\text{C}$  NMR (150 MHz,  $\text{CDCl}_3$ )  $\delta$ : 146.7, 140.1, 139.0, 135.5, 129.5, 128.8, 125.4, 121.3, 120.8, 120.0, 119.9, 119.3, 112.6, 112.5, 109.6, 109.0, 20.9, 20.1. HRMS (ESI)  $m/z$ :  $[\text{M}+\text{H}]^+$  Calcd for  $\text{C}_{20}\text{H}_{19}\text{N}_2$  287.1543; Found 287.1545.

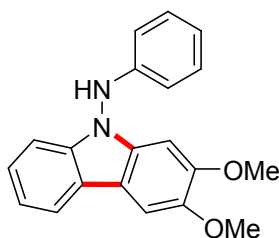

### 2, 3-Dimethoxy-*N*-phenyl-9*H*-carbazol-9-amine (4b)

Eluent: petroleum ether/ethyl acetate (15:1). White solid (47.7 mg, 75% yield); mp: 157–159 °C;  $R_f = 0.2$  (petroleum ether/ethyl acetate = 10:1).  $^1\text{H}$  NMR (600 MHz,  $\text{DMSO}-d_6$ )  $\delta$ : 9.28 (s, 1H), 8.08 (d,  $J = 7.8$  Hz, 1H), 7.77 (s, 1H), 7.27 (t,  $J = 7.2$  Hz,

1H), 7.21 (d,  $J = 7.8$  Hz, 1H), 7.16 (t,  $J = 7.2$  Hz, 1H), 7.12 (t,  $J = 7.8$  Hz, 2H), 6.91 (s, 1H), 6.76 (t,  $J = 7.2$  Hz, 1H), 6.40 (d,  $J = 7.8$  Hz, 2H), 3.88 (s, 3H), 3.77 (s, 3H);  $^{13}\text{C}$  NMR (150 MHz, DMSO- $d_6$ )  $\delta$ : 150.1, 148.2, 145.0, 139.6, 135.5, 129.7, 124.6, 121.4, 120.2, 120.1, 119.8, 112.7, 112.5, 109.4, 104.3, 93.0, 56.8, 56.2. HRMS (ESI)  $m/z$ :  $[\text{M}+\text{H}]^+$  Calcd for  $\text{C}_{20}\text{H}_{19}\text{N}_2\text{O}_2$  319.1441; Found 319.1443.

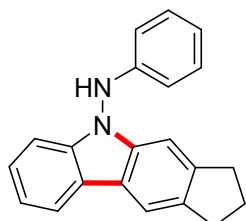

***N*-Phenyl-2, 3-dihydrocyclopenta[*b*]carbazol-5(1*H*)-amine (4c)**

Eluent: petroleum ether/ethyl acetate (50:1). White solid (39.9 mg, 67% yield); mp: 177–179 °C;  $R_f = 0.4$  (petroleum ether/ethyl acetate = 20:1).  $^1\text{H}$  NMR (600 MHz,  $\text{CDCl}_3$ )  $\delta$ : 8.01 (d,  $J = 7.8$  Hz, 1H), 7.88 (s, 1H), 7.34–7.31 (m, 1H), 7.25 (d,  $J = 8.4$  Hz, 1H), 7.21 (t,  $J = 7.2$  Hz, 1H), 7.15–7.12 (m, 2H), 7.10 (s, 1H), 6.84 (t,  $J = 7.2$  Hz, 1H), 6.52 (d,  $J = 7.8$  Hz, 2H), 6.27 (s, 1H), 3.03 (t,  $J = 7.2$  Hz, 2H), 2.95 (t,  $J = 7.2$  Hz, 2H), 2.15–2.10 (m, 2H);  $^{13}\text{C}$  NMR (150 MHz,  $\text{CDCl}_3$ )  $\delta$ : 146.7, 143.5, 140.4, 139.8, 136.7, 129.5, 125.4, 121.5, 120.8, 120.3, 119.93, 119.87, 115.5, 112.6, 108.9, 104.7, 33.3, 32.5, 26.4. HRMS (ESI)  $m/z$ :  $[\text{M}+\text{H}]^+$  Calcd for  $\text{C}_{21}\text{H}_{19}\text{N}_2$  299.1543; Found 299.1542.

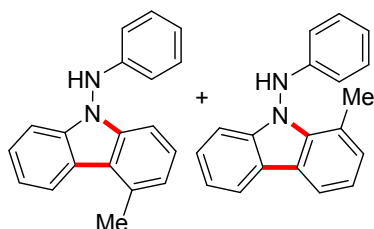

**4-Methyl-*N*-phenyl-9*H*-carbazol-9-amine (4d) and 1-Methyl-*N*-phenyl-9*H*-carbazol-9-amine (4d')**

Eluent: petroleum ether/ethyl acetate (50:1). White solid (33.1 mg, 61% yield);  $R_f = 0.4$  (petroleum ether/ethyl acetate = 20:1).  $^1\text{H}$  NMR (600 MHz, DMSO- $d_6$ )  $\delta$ : 9.41 (s, 0.14H), 9.39 (s, 1H), 8.20 (d,  $J = 7.8$  Hz, 1H), 8.17 (d,  $J = 7.8$  Hz, 0.16H), 8.04 (d,  $J =$

7.2 Hz, 0.14H), 7.43 (t,  $J = 7.8$  Hz, 1H), 7.38 (d,  $J = 7.8$  Hz, 1H), 7.32 (t,  $J = 7.8$  Hz, 1H), 7.27 (t,  $J = 7.8$  Hz, 1H), 7.23 (d,  $J = 7.2$  Hz, 0.13H), 7.21 (d,  $J = 8.1$  Hz, 1H), 7.15–7.10 (m, 2.6H), 7.04 (d,  $J = 6.6$  Hz, 1H), 6.77 (t,  $J = 7.2$  Hz, 1H), 6.74 (d,  $J = 7.2$  Hz, 0.14H), 6.41 (d,  $J = 7.8$  Hz, 2H), 6.36 (d,  $J = 6.0$  Hz, 0.29H), 2.85 (s, 3H), 2.54 (s, 0.42H);  $^{13}\text{C}$  NMR (150 MHz, DMSO- $d_6$ )  $\delta$ : 149.1, 148.1, 140.7, 140.3, 140.1, 138.5, 133.4, 129.8, 129.7, 129.1, 126.5, 126.4, 126.0, 122.9, 121.8, 121.5, 121.4, 121.1, 120.9, 120.7, 120.4, 120.3, 120.2, 119.7, 119.4, 118.7, 112.7, 111.7, 109.6, 109.3, 107.1, 20.8, 18.0. HRMS (ESI)  $m/z$ :  $[\text{M}+\text{H}]^+$  Calcd for  $\text{C}_{19}\text{H}_{17}\text{N}_2$  273.1386; Found 273.1385.

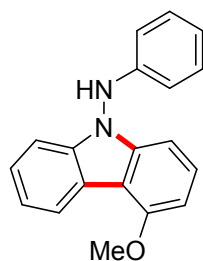

#### 4-Methoxy-*N*-phenyl-9*H*-carbazol-9-amine (4e)

Eluent: petroleum ether/ethyl acetate (20:1). White solid (37.4 mg, 65% yield); mp: 156–158 °C;  $R_f = 0.3$  (petroleum ether/ethyl acetate = 20:1).  $^1\text{H}$  NMR (600 MHz,  $\text{CDCl}_3$ )  $\delta$ : 8.33 (d,  $J = 8.4$  Hz, 1H), 7.34 (t,  $J = 7.8$  Hz, 1H), 7.30–7.25 (m, 3H), 7.13 (t,  $J = 7.2$  Hz, 2H), 6.91 (d,  $J = 7.8$  Hz, 1H), 6.85 (d,  $J = 7.2$  Hz, 1H), 6.68 (d,  $J = 8.4$  Hz, 1H), 6.51 (d,  $J = 7.8$  Hz, 2H), 6.35 (s, 1H), 4.06 (s, 3H);  $^{13}\text{C}$  NMR (150 MHz,  $\text{CDCl}_3$ )  $\delta$ : 156.2, 146.6, 141.7, 139.4, 129.5, 127.0, 125.3, 123.1, 121.0, 120.6, 120.4, 112.7, 110.4, 108.5, 102.0, 101.3, 55.6. HRMS (ESI)  $m/z$ :  $[\text{M} + \text{H}]^+$  Calcd for  $\text{C}_{19}\text{H}_{17}\text{N}_2\text{O}$  289.1335; Found 289.1340.

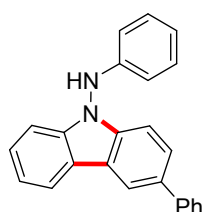

#### *N*-Phenyl-4-phenyl-9*H*-carbazol-9-amine (4f)

Eluent: petroleum ether/ethyl acetate (30:1). White solid (40.0 mg, 60% yield); mp: 153–155 °C;  $R_f = 0.3$  (petroleum ether/ethyl acetate = 20:1).  $^1\text{H}$  NMR (600 MHz,  $\text{CDCl}_3$ )  $\delta$ : 8.12–8.05 (m, 2H), 7.63 (d,  $J = 7.8$  Hz, 2H), 7.55 (s, 1H), 7.51 (d,  $J = 7.8$  Hz, 1H), 7.43–7.36 (m, 3H), 7.34–7.25 (m, 3H), 7.15 (t,  $J = 7.8$  Hz, 2H), 6.87 (t,  $J = 7.2$  Hz, 1H), 6.57 (d,  $J = 7.8$  Hz, 2H), 6.43 (s, 1H);  $^{13}\text{C}$  NMR (150 MHz,  $\text{CDCl}_3$ )  $\delta$ : 146.5, 141.7, 140.9, 140.6, 139.7, 129.5, 128.8, 127.6, 127.2, 126.2, 121.3, 121.1, 120.7, 120.52, 120.46, 120.4, 119.9, 112.7, 109.2, 107.4. HRMS (ESI)  $m/z$ :  $[\text{M} + \text{H}]^+$  Calcd for  $\text{C}_{24}\text{H}_{19}\text{N}_2$  335.1543; Found 335.1541.

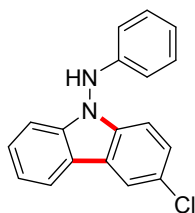

### 3-Chloro-*N*-phenyl-9*H*-carbazol-9-amine (4g)

Eluent: petroleum ether/ethyl acetate (50:1). White solid (42.0 mg, 72% yield); mp: 136–138 °C;  $R_f = 0.4$  (petroleum ether/ethyl acetate = 20:1).  $^1\text{H}$  NMR (600 MHz,  $\text{CDCl}_3$ )  $\delta$ : 8.05 (d,  $J = 5.4$  Hz, 2H), 7.44 (t,  $J = 7.8$  Hz, 1H), 7.36 (d,  $J = 8.4$  Hz, 2H), 7.30–7.28 (m, 2H), 7.19 (t,  $J = 7.8$  Hz, 2H), 6.91 (t,  $J = 7.2$  Hz, 1H), 6.57 (d,  $J = 7.8$  Hz, 2H), 6.52 (s, 1H);  $^{13}\text{C}$  NMR (150 MHz,  $\text{CDCl}_3$ )  $\delta$ : 146.2, 140.6, 138.6, 129.6, 126.9, 126.3, 125.8, 122.4, 121.3, 120.6, 120.5, 120.2, 112.7, 110.1, 109.3. HRMS (ESI)  $m/z$ :  $[\text{M} + \text{H}]^+$  Calcd for  $\text{C}_{18}\text{H}_{14}\text{ClN}_2$  293.0840; Found 293.0840.

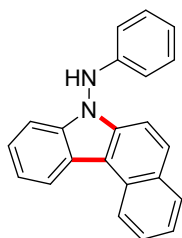

### *N*-Phenyl-7*H*-benzo[*c*]carbazol-7-amine (4h)

Eluent: petroleum ether/ethyl acetate (40:1). White solid (42.5 mg, 69% yield); mp: 166–168 °C;  $R_f = 0.4$  (petroleum ether/ethyl acetate = 20:1).  $^1\text{H}$  NMR (600 MHz,  $\text{DMSO}-d_6$ )  $\delta$ : 9.62 (s, 1H), 8.84 (d,  $J = 8.4$  Hz, 1H), 8.67 (d,  $J = 7.8$  Hz, 1H), 8.07 (d,

$J = 7.8$  Hz, 1H), 7.96 (d,  $J = 8.4$  Hz, 1H), 7.76 (t,  $J = 7.2$  Hz, 1H), 7.65 (d,  $J = 9.0$  Hz, 1H), 7.51 (t,  $J = 7.8$  Hz, 2H), 7.46 (t,  $J = 7.8$  Hz, 1H), 7.39 (t,  $J = 7.2$  Hz, 1H), 7.12 (t,  $J = 7.8$  Hz, 2H), 6.78 (t,  $J = 7.2$  Hz, 1H), 6.43 (d,  $J = 7.8$  Hz, 2H);  $^{13}\text{C}$  NMR (150 MHz,  $\text{DMSO-}d_6$ )  $\delta$ : 148.3, 139.1, 138.2, 129.8, 129.7, 129.6, 128.1, 127.8, 125.2, 123.7, 123.5, 122.4, 121.4, 121.3, 120.5, 112.8, 112.7, 111.4, 110.1. HRMS (ESI)  $m/z$ :  $[\text{M}+\text{H}]^+$  Calcd for  $\text{C}_{22}\text{H}_{17}\text{N}_2$  309.1386; Found 309.1383.

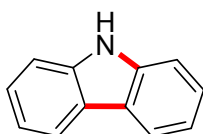

### **9H-Carbazole (5a)**<sup>6</sup>

Eluent: petroleum ether/ethyl acetate (20:1). White solid (30.7 mg, 92% yield); mp: 223–225 °C;  $R_f = 0.4$  (petroleum ether/ethyl acetate = 10:1).  $^1\text{H}$  NMR (600 MHz,  $\text{DMSO-}d_6$ )  $\delta$ : 11.24 (s, 1H), 8.10 (d,  $J = 7.8$  Hz, 2H), 7.49 (d,  $J = 7.8$  Hz, 2H), 7.38 (t,  $J = 7.2$  Hz, 2H), 7.15 (t,  $J = 7.2$  Hz, 2H);  $^{13}\text{C}$  NMR (150 MHz,  $\text{DMSO-}d_6$ )  $\delta$ : 140.2, 126.0, 122.8, 120.6, 119.0, 111.4. HRMS (ESI)  $m/z$ :  $[\text{M}+\text{H}]^+$  Calcd for  $\text{C}_{12}\text{H}_{10}\text{N}$  168.0808; Found 168.0805.

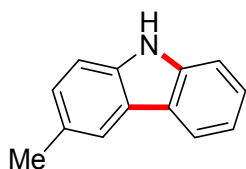

### **3-Methyl-9H-carbazole (5b)**<sup>6</sup>

Eluent: petroleum ether/ethyl acetate (20:1). White solid (31.9 mg, 88% yield); mp: 215–217 °C;  $R_f = 0.5$  (petroleum ether/ethyl acetate = 10:1).  $^1\text{H}$  NMR (600 MHz,  $\text{DMSO-}d_6$ )  $\delta$ : 11.07 (s, 1H), 8.05 (d,  $J = 7.8$  Hz, 1H), 7.89 (s, 1H), 7.44 (d,  $J = 7.8$  Hz, 1H), 7.37–7.33 (m, 2H), 7.21–7.19 (m, 1H), 7.12–7.10 (m, 1H), 2.46 (s, 3H);  $^{13}\text{C}$  NMR (150 MHz,  $\text{DMSO-}d_6$ )  $\delta$ : 140.4, 138.4, 127.5, 127.3, 125.8, 123.0, 122.7, 120.5, 120.4, 118.7, 111.3, 111.1, 21.6. HRMS (ESI)  $m/z$ :  $[\text{M}+\text{H}]^+$  Calcd for  $\text{C}_{13}\text{H}_{12}\text{N}$  182.0964; Found 182.0965.

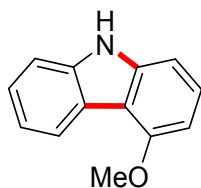

#### 4-Methoxy-9H-carbazole (5c)<sup>4</sup>

Eluent: petroleum ether/ethyl acetate (15:1). Off-white solid (32.7 mg, 83% yield); mp: 132–134 °C;  $R_f$  = 0.3 (petroleum ether/ethyl acetate = 10:1).  $^1\text{H}$  NMR (600 MHz,  $\text{CDCl}_3$ )  $\delta$ : 8.32 (d,  $J$  = 7.8 Hz, 1H), 7.99 (s, 1H), 7.39–7.35 (m, 2H), 7.33 (t,  $J$  = 7.8 Hz, 1H), 7.23 (t,  $J$  = 6.6 Hz, 1H), 7.01 (d,  $J$  = 7.8 Hz, 1H), 6.67 (d,  $J$  = 7.8 Hz, 1H), 4.06 (s, 3H);  $^{13}\text{C}$  NMR (150 MHz,  $\text{CDCl}_3$ )  $\delta$ : 156.3, 140.9, 138.6, 126.7, 124.9, 123.1, 122.7, 119.6, 112.6, 110.0, 103.5, 100.4, 55.5. HRMS (ESI)  $m/z$ :  $[\text{M}+\text{H}]^+$  Calcd for  $\text{C}_{13}\text{H}_{12}\text{NO}$  198.0913; Found 198.0915.

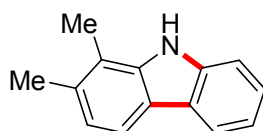

#### 1,2-Dimethyl-9H-carbazole (5d)<sup>7</sup>

Eluent: petroleum ether/ethyl acetate (20:1). White solid (36.2 mg, 93% yield); mp: 126–128 °C;  $R_f$  = 0.4 (petroleum ether/ethyl acetate = 10:1).  $^1\text{H}$  NMR (600 MHz,  $\text{DMSO}-d_6$ )  $\delta$ : 11.00 (s, 1H), 8.01 (d,  $J$  = 7.8 Hz, 1H), 7.79 (d,  $J$  = 8.4 Hz, 1H), 7.46 (d,  $J$  = 7.8 Hz, 1H), 7.35–7.28 (m, 1H), 7.13–7.06 (m, 1H), 6.97 (d,  $J$  = 7.8 Hz, 1H), 2.45 (s, 3H), 2.39 (s, 3H);  $^{13}\text{C}$  NMR (150 MHz,  $\text{DMSO}-d_6$ )  $\delta$ : 140.4, 140.2, 133.3, 125.3, 123.5, 121.5, 120.8, 120.3, 118.8, 118.5, 117.5, 111.3, 20.0, 13.9. HRMS (ESI)  $m/z$ :  $[\text{M}+\text{H}]^+$  Calcd for  $\text{C}_{14}\text{H}_{14}\text{N}$  196.1121; Found 196.1120.

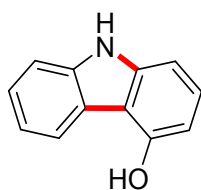

#### 9H-Carbazol-4-ol (6)<sup>8</sup>

Eluent: petroleum ether/ethyl acetate (10:1). White solid (30.0 mg, 82% yield); mp:

169–172 °C;  $R_f = 0.3$  (petroleum ether/ethyl acetate = 5:1).  $^1\text{H}$  NMR (600 MHz,  $\text{CDCl}_3$ )  $\delta$ : 8.27 (d,  $J = 7.2$  Hz, 1H), 8.06 (s, 1H), 7.41–7.38 (m, 2H), 7.26–7.23 (m, 3H), 7.02 (d,  $J = 7.8$  Hz, 1H), 6.58 (d,  $J = 7.2$  Hz, 1H), 5.37 (s, 1H);  $^{13}\text{C}$  NMR (150 MHz,  $\text{CDCl}_3$ )  $\delta$ : 151.9, 141.4, 138.9, 126.6, 125.2, 122.8, 122.3, 119.7, 111.8, 110.1, 105.2, 103.4. HRMS (ESI)  $m/z$ :  $[\text{M}+\text{H}]^+$  Calcd for  $\text{C}_{14}\text{H}_{14}\text{N}$  184.0757; Found 184.0759.

## 7. References

- 1 (a) C. Zhang and N. Jiao, Copper-Catalyzed Aerobic Oxidative Dehydrogenative Coupling of Anilines Leading to Aromatic Azo Compounds Using Dioxide as An Oxidant, *Angew. Chem. Int. Ed.*, 2010, **49**, 6174; (b) G. Li, X.-X. Ma, C.-Q. Jia, Q.-Q. H, Y. Wang, J.-J. Wang, L.-Y. Yu and S.-L. Yang, Ruthenium-Catalyzed *meta/ortho*-Selective C–H Alkylation of Azoarenes Using Alkyl Bromides, *Chem. Commun.*, 2017, **53**, 1261; (c) Z.-C. Wang, Z.-P. Yin, F.-X. Zhu, Y.-H. Li and X.-F. Wu, Palladium-Catalyzed Carbonylative Cyclization of Azoarenes, *ChemCatChem*, 2017, **9**, 3637.
- 2 (a) A.-T. Biju and F. Glorius, Intermolecular *N*-Heterocyclic Carbene Catalyzed Hydroacylation of Arynes, *Angew. Chem. Int. Ed.*, 2010, **49**, 9761; (b) B. S. Shaibu, R. K. Kawade and R.-S. Liu, Regioselective Synthesis of 2-(2-Hydroxyaryl)pyridines from the Reactions of Benzynes with Pyridine *N*-Oxides, *Org. Biomol. Chem.*, 2012, **10**, 6834.
- 3 Y. Zhang, Q. Tang and M. Luo, Reduction of Hydrazines to Amines with Aqueous Solution of Titanium(III) Trichloride, *Org. Biomol. Chem.*, 2011, **9**, 4977.
- 4 Y. Ou and N. Jiao, Recyclable Copper Catalyzed Nitrogenation of Biphenyl Halides: A Direct Approach to Carbazoles, *Chem. Commun.*, 2013, **49**, 3473.
- 5 L. Benati, G. Placucci, P. Spagnolo, A. Tundo and G. Zanardi, Intramolecular Addition of Aryl Radicals to the Azo-group; Synthesis and Properties of *N*-(Carbazol-9-yl)phenylaminy Radicals, *J. Chem. Soc. Perkin 1*, 1977, **14**, 1684.
- 6 T. Watanabe, S. Ueda, S. Inuki, S. Oishi, N. Fujii and H. Ohno, One-Pot Synthesis of Carbazoles by Palladium-Catalyzed *N*-Arylation and Oxidative Coupling, *Chem. Commun.*, 2007, **43**, 4516.
- 7 P. Tharra and B. Baire, Regioselective Cyclization of (Indol-3-yl)pentyn-3-ols as An Approach to (Tetrahydro)carbazoles, *Org. Lett.*, 2018, **20**, 1118.
- 8 C. Brütting, R. Hesse, A. Jäger, O. Kataeva, A.W. Schmidt and H.-J. Knölker, Synthesis of Glycoborine, Glybomine A and B, the Phytoalexin Carbalexin A and the  $\beta$ -Adrenoreceptor Antagonists Carazolol and Carvedilol, *Chem. – Eur. J.*, 2016, **22**, 16897.



## 8. $^1\text{H}$ , $^{13}\text{C}$ and $^{19}\text{F}$ NMR spectra of the products

3a:  $^1\text{H}$  NMR (600 MHz) and  $^{13}\text{C}$  NMR (150 MHz),  $\text{CDCl}_3$

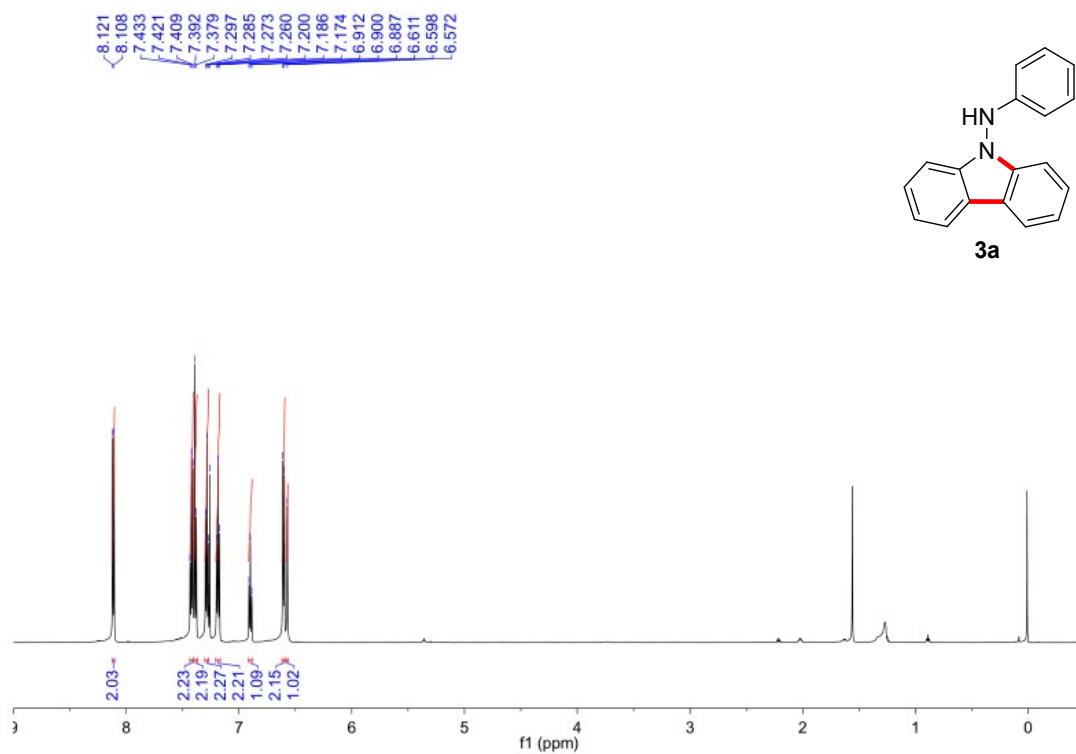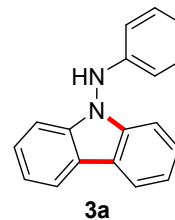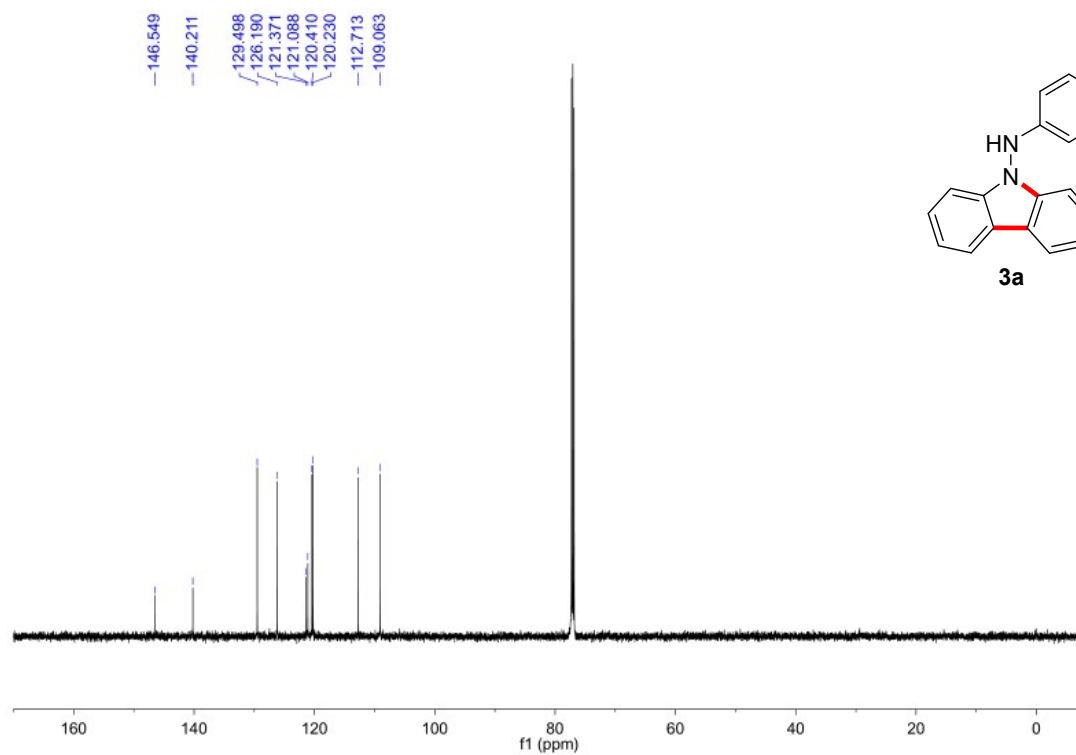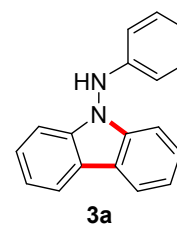

**3b**:  $^1\text{H}$  NMR (600 MHz) and  $^{13}\text{C}$  NMR (150 MHz),  $\text{DMSO-}d_6$

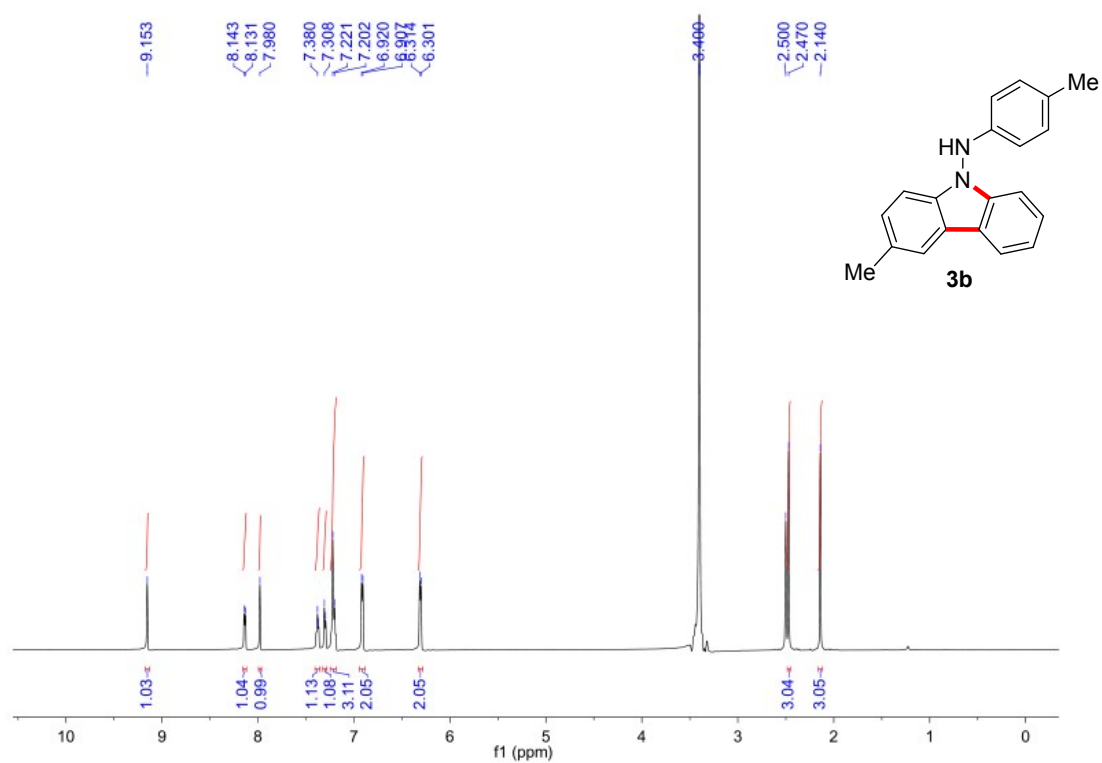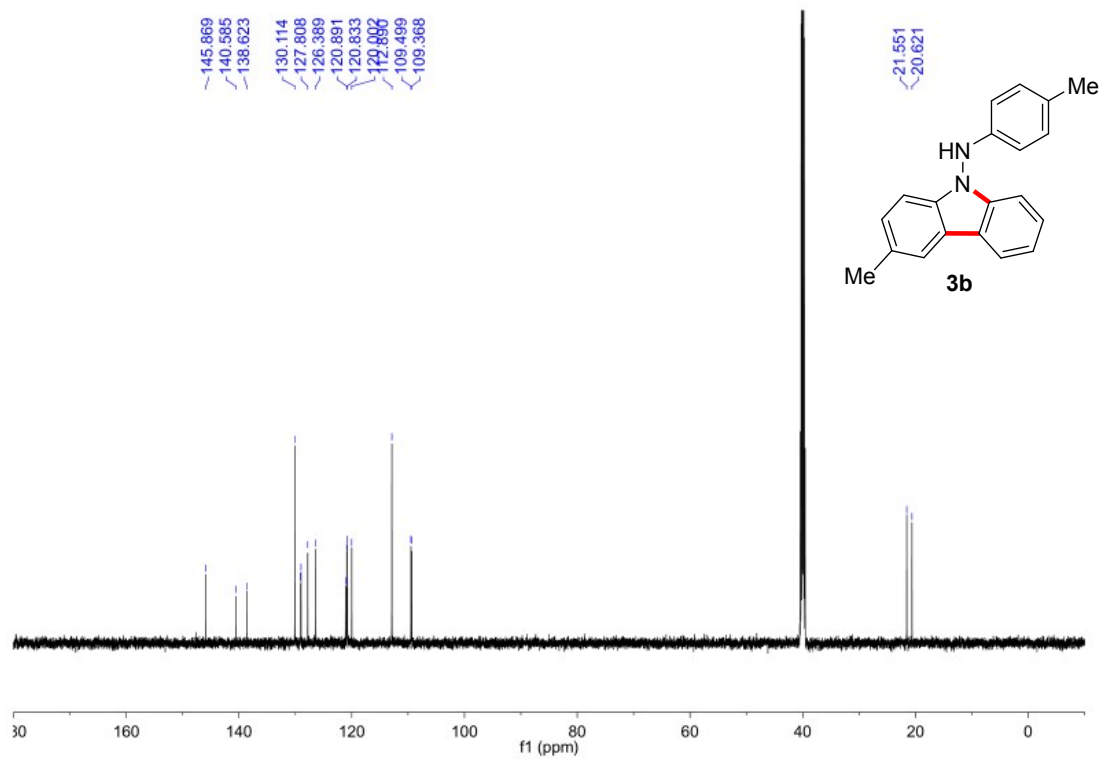

**3c:**  $^1\text{H}$  NMR (600 MHz) and  $^{13}\text{C}$  NMR (150 MHz),  $\text{DMSO-}d_6$

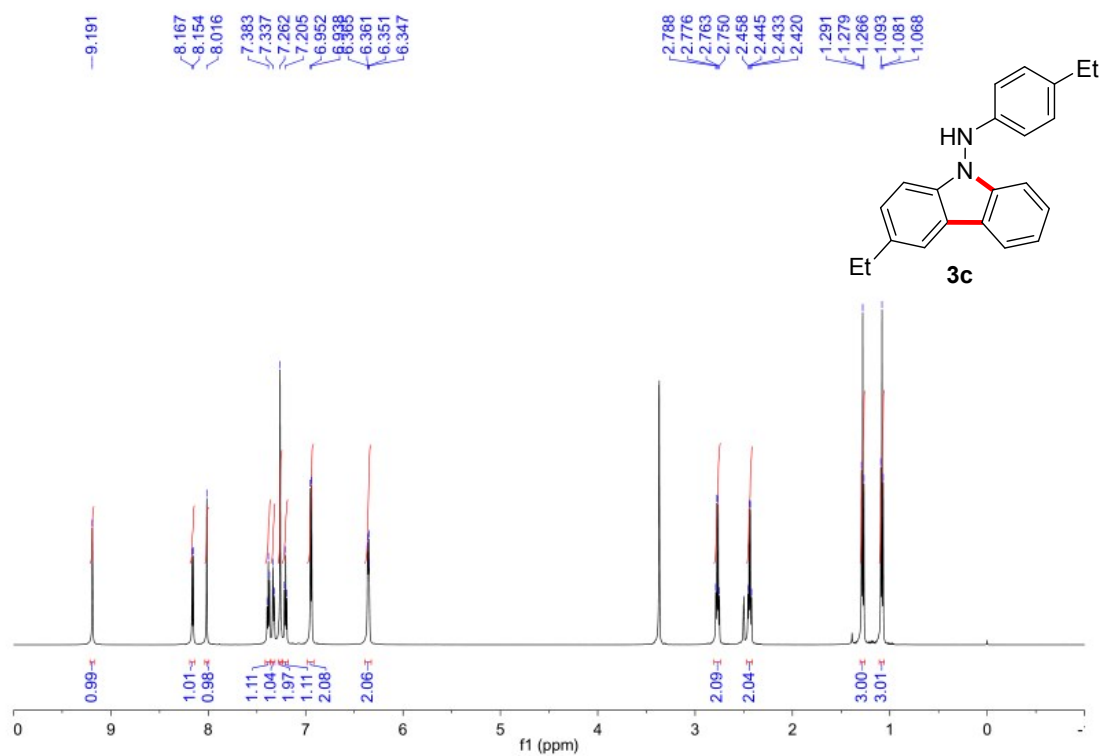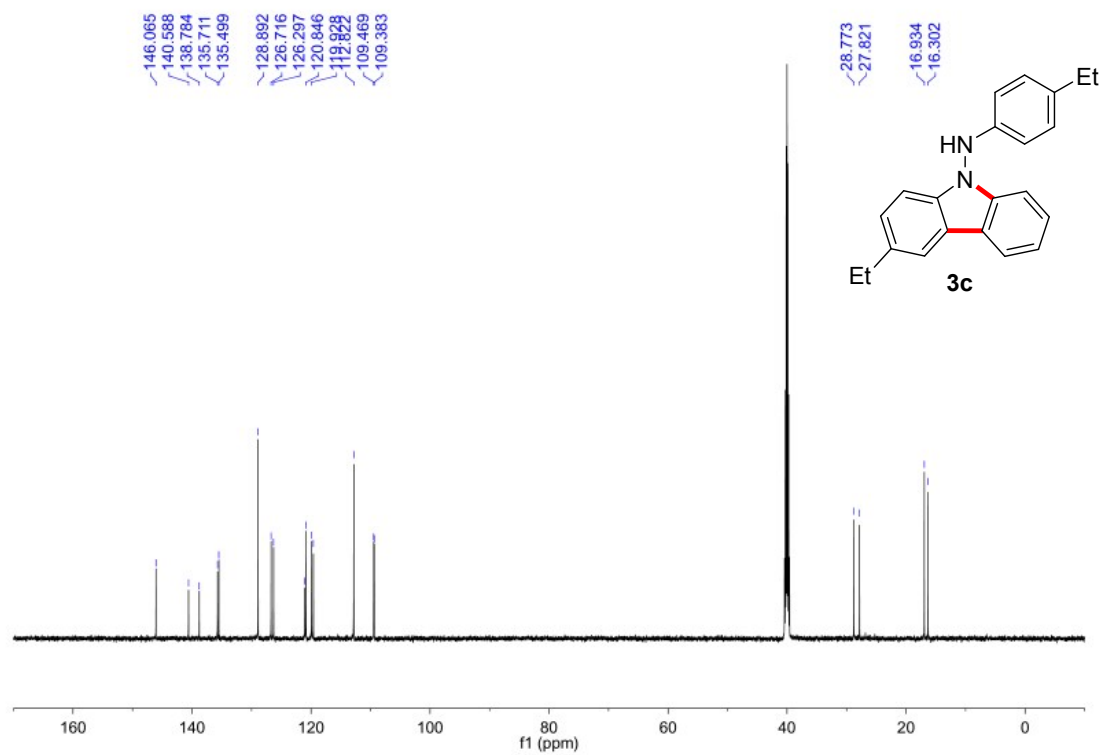

**3d:**  $^1\text{H}$  NMR (600 MHz) and  $^{13}\text{C}$  NMR (150 MHz),  $\text{DMSO-}d_6$

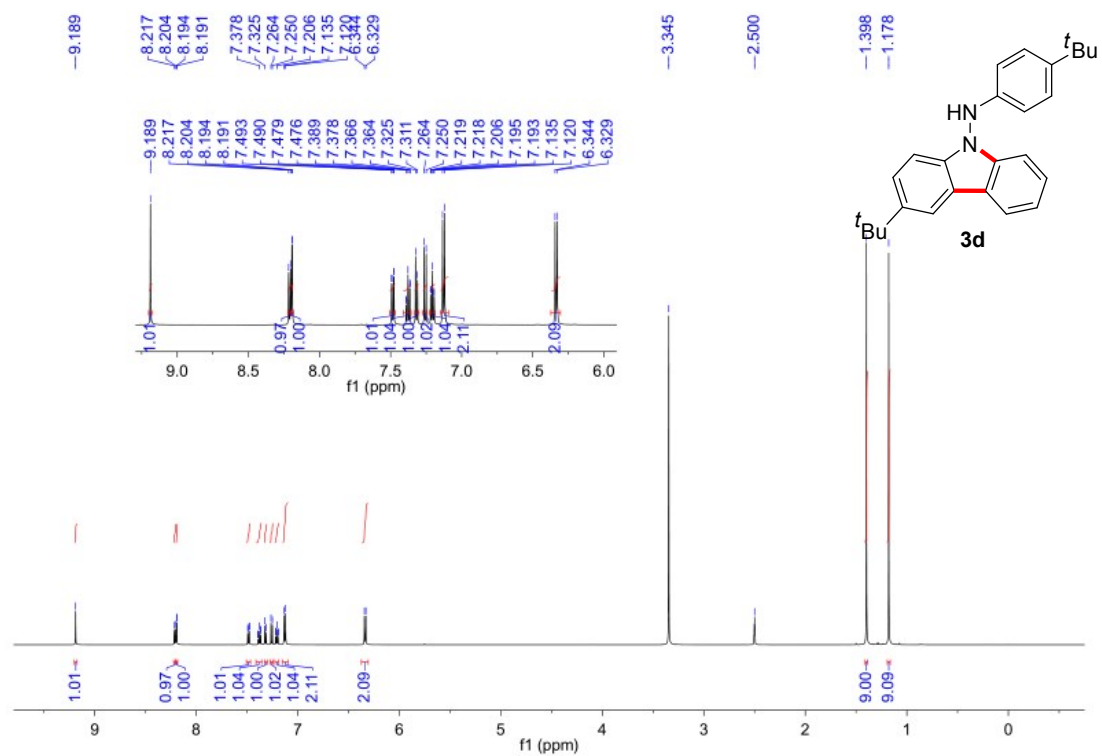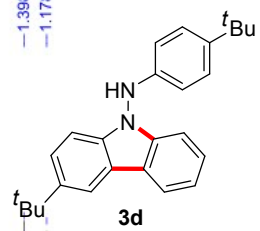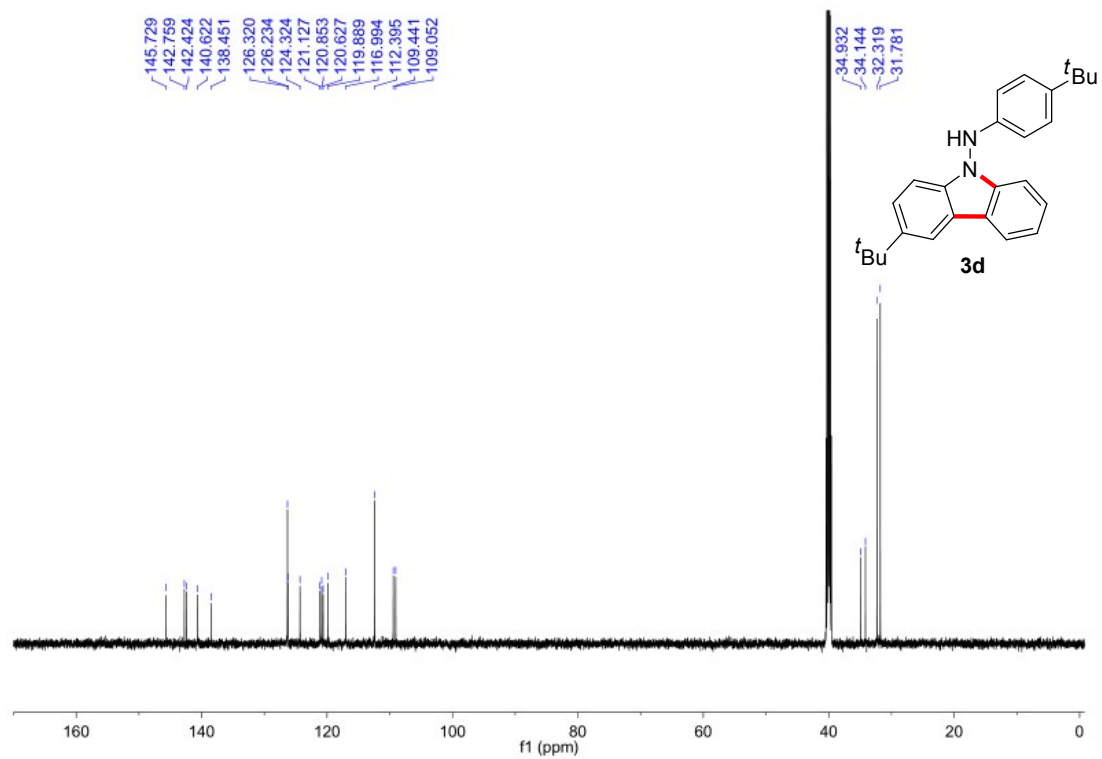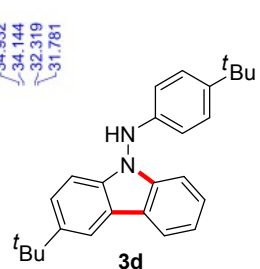

**3e:**  $^1\text{H}$  NMR (600 MHz) and  $^{13}\text{C}$  NMR (150 MHz), acetone- $d_6$

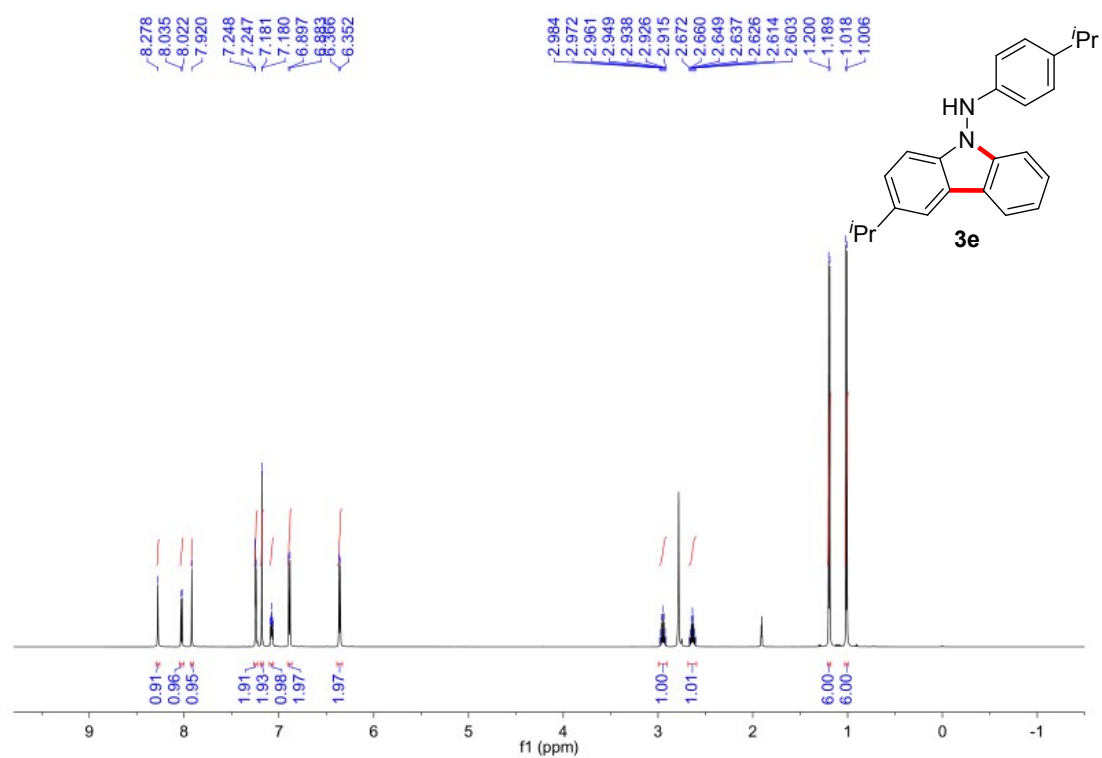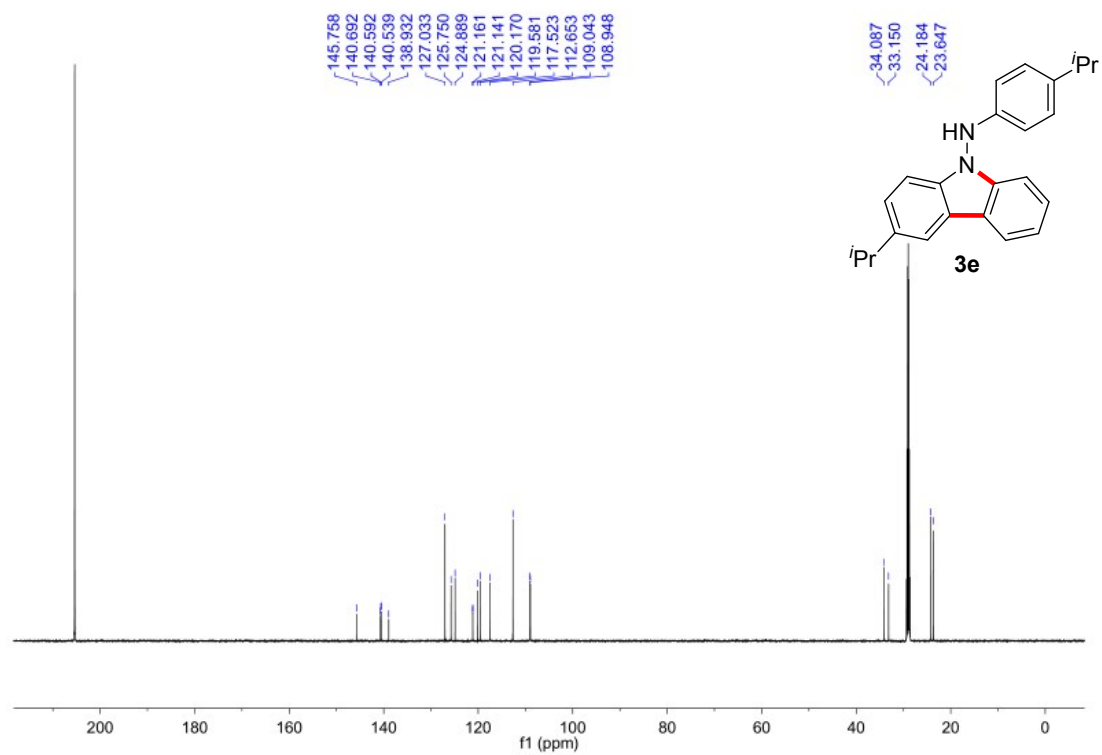

**3f**:  $^1\text{H}$  NMR (600 MHz) and  $^{13}\text{C}$  NMR (150 MHz),  $\text{DMSO-}d_6$

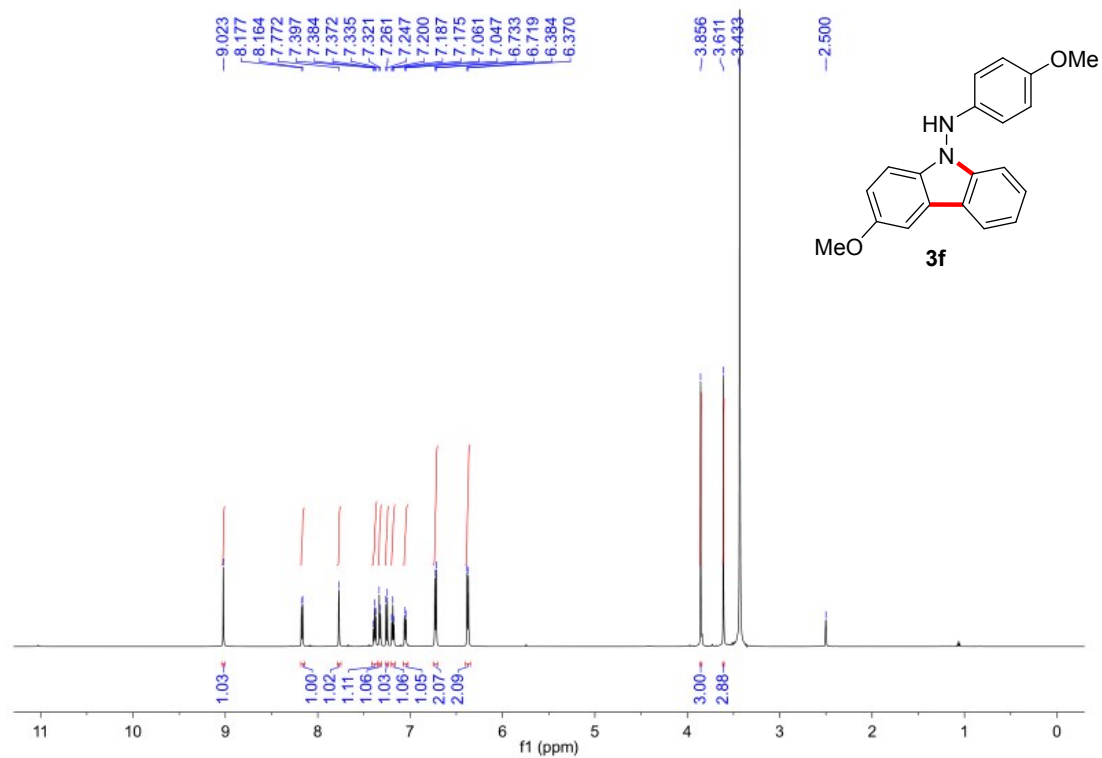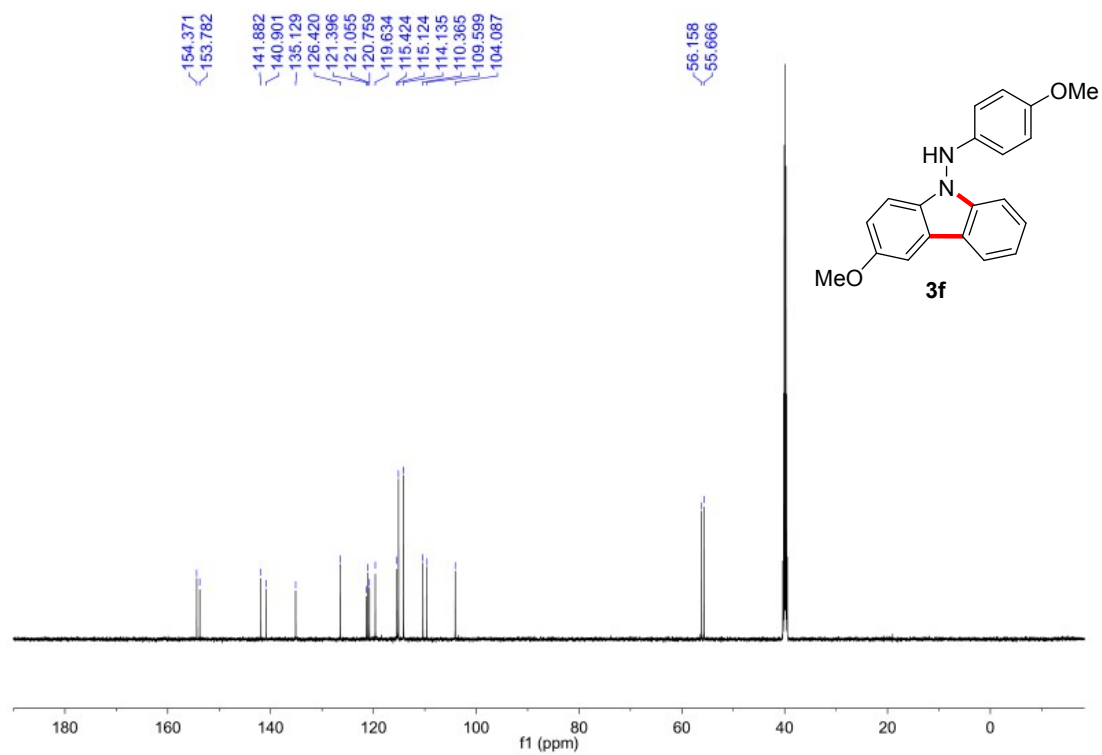

**3g**:  $^1\text{H}$  NMR (600 MHz) and  $^{13}\text{C}$  NMR (150 MHz),  $\text{DMSO-}d_6$

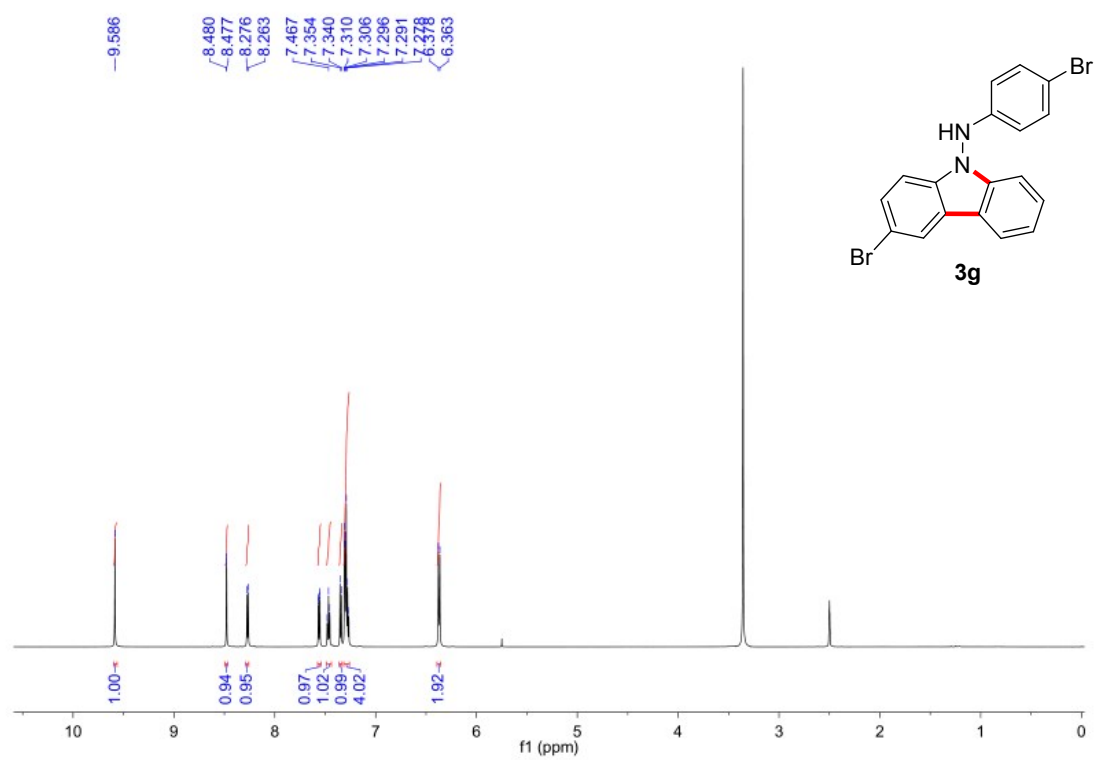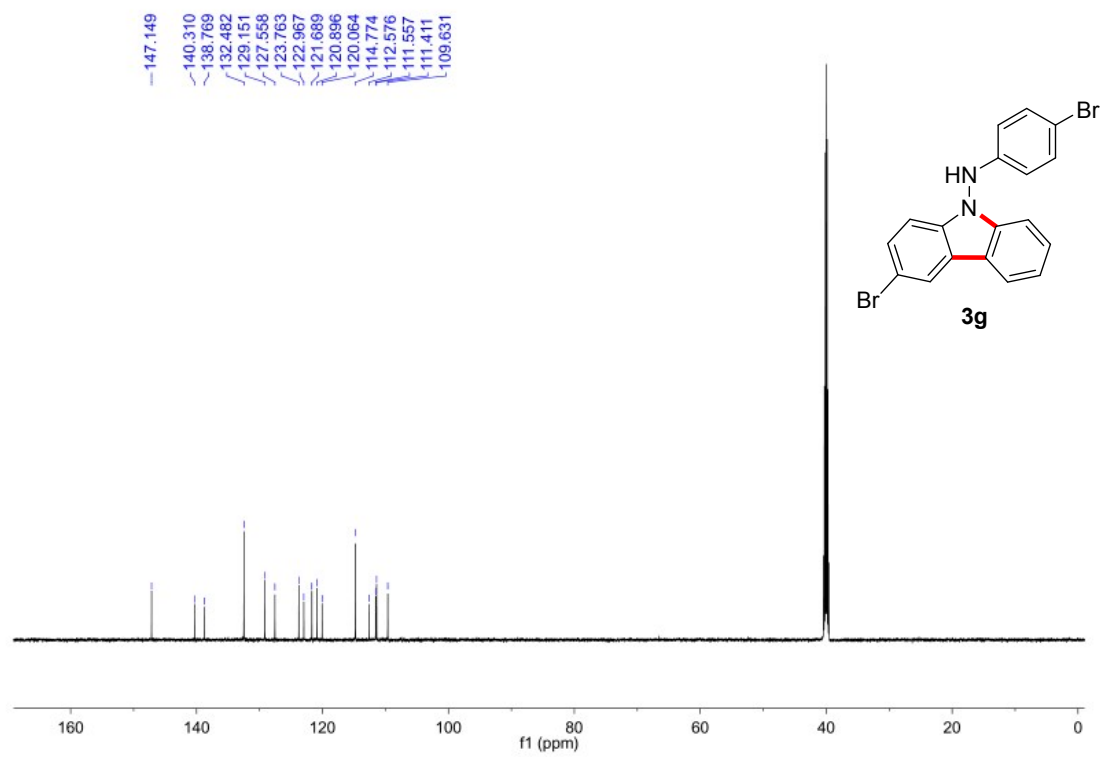

**3h**:  $^1\text{H}$  NMR (600 MHz) and  $^{13}\text{C}$  NMR (150 MHz),  $\text{DMSO-}d_6$

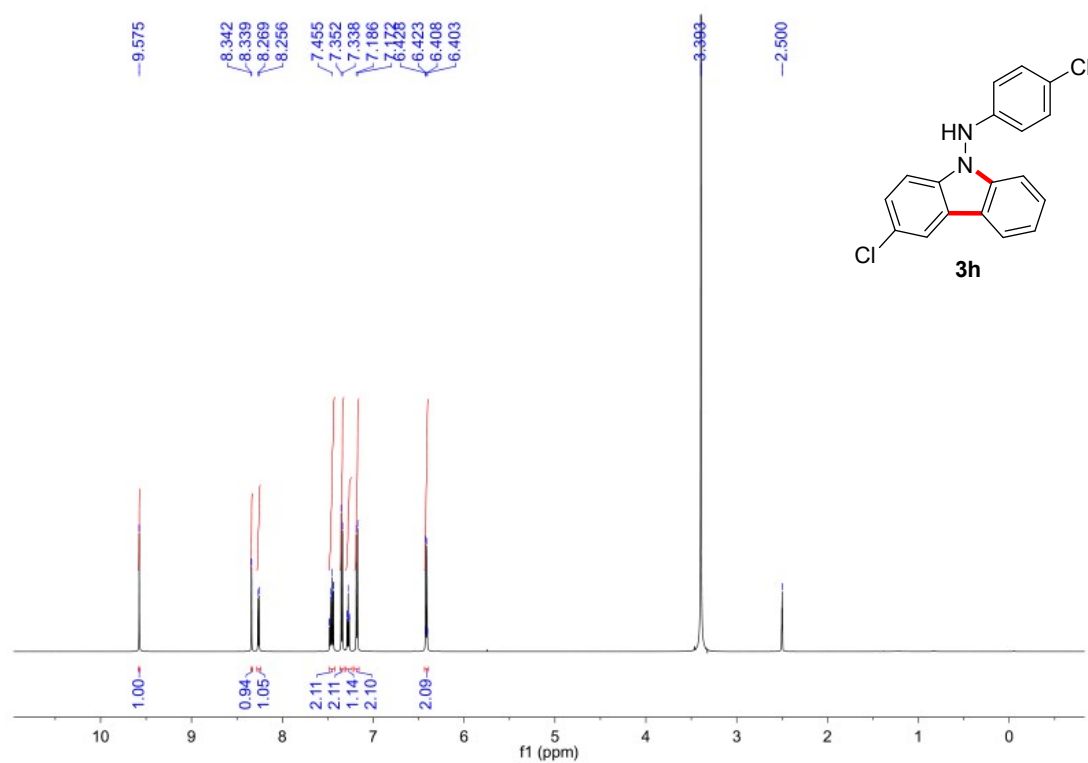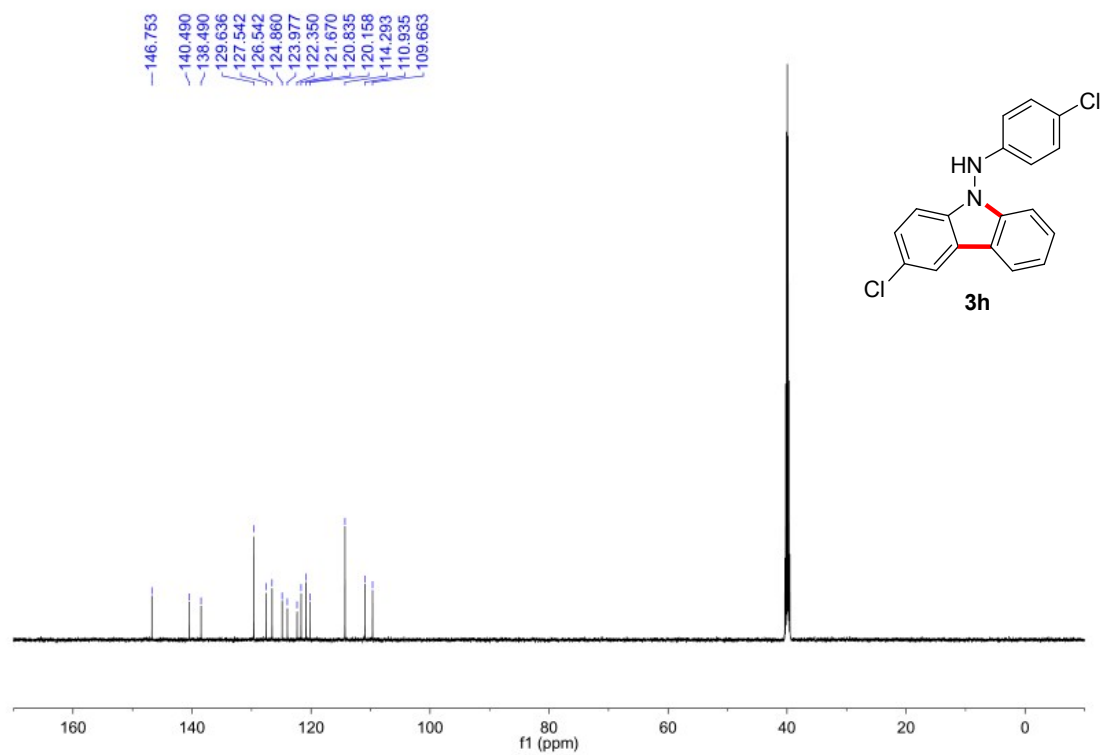



**3i:**  $^1\text{H}$  NMR (600 MHz) and  $^{13}\text{C}$  NMR (150 MHz),  $\text{DMSO-}d_6$

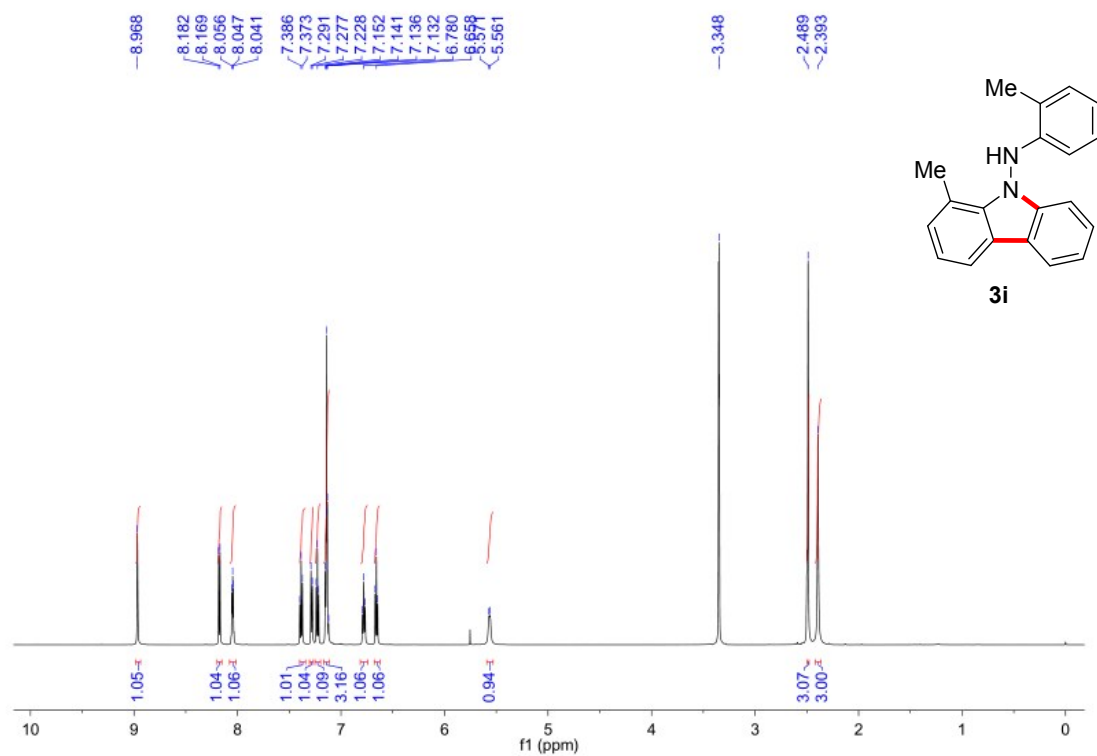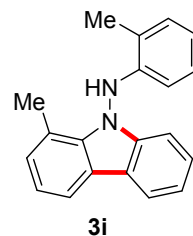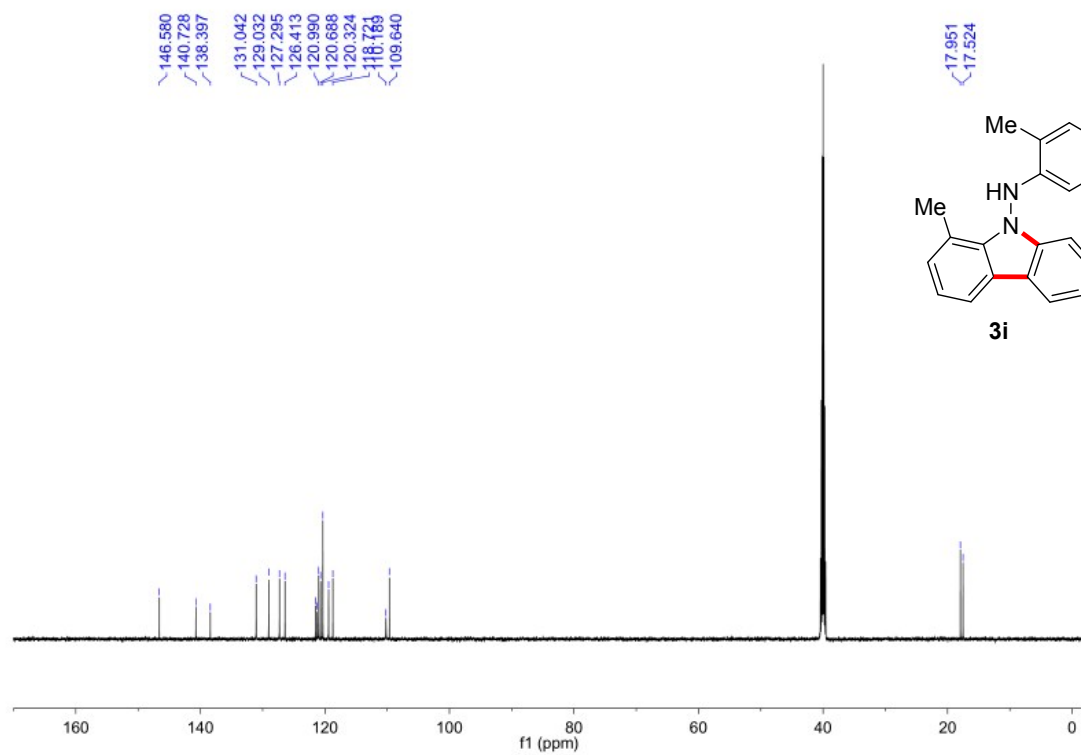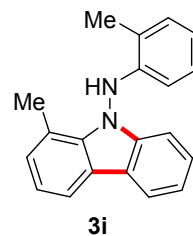

**3j**:  $^1\text{H}$  NMR (600 MHz),  $^{13}\text{C}$  NMR (150 MHz) and  $^{19}\text{F}$  NMR (565 MHz),  $\text{DMSO-}d_6$

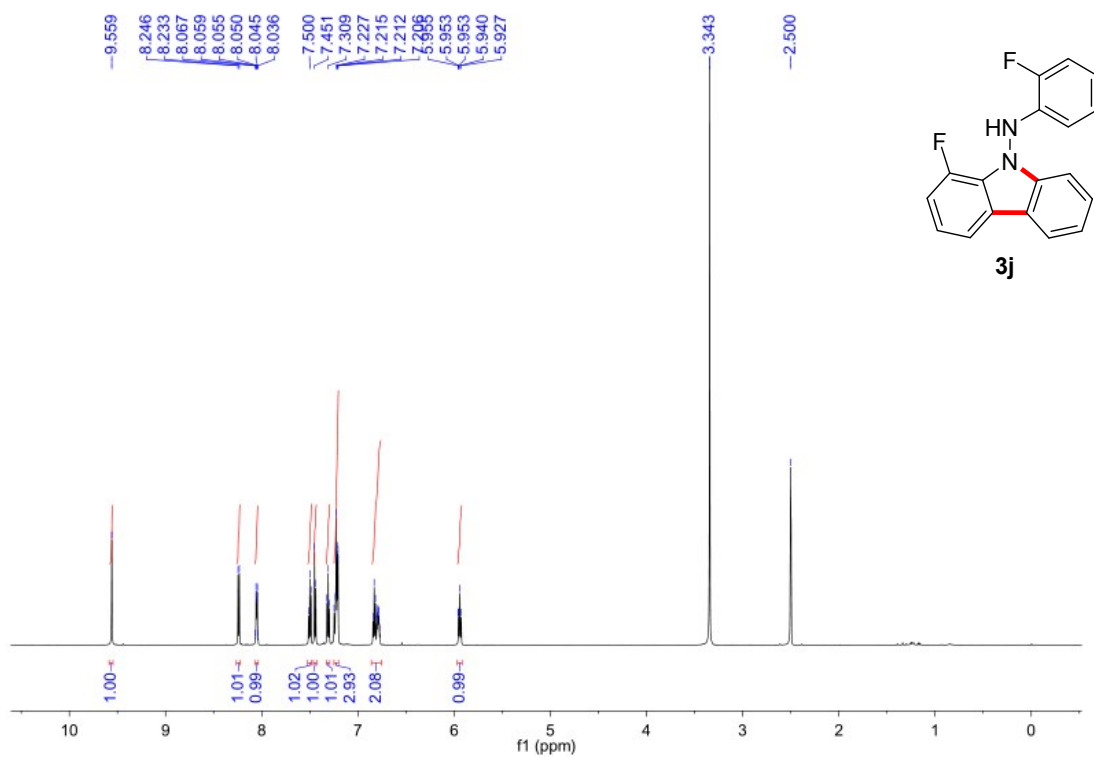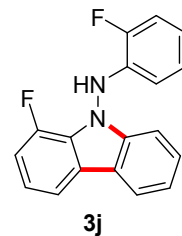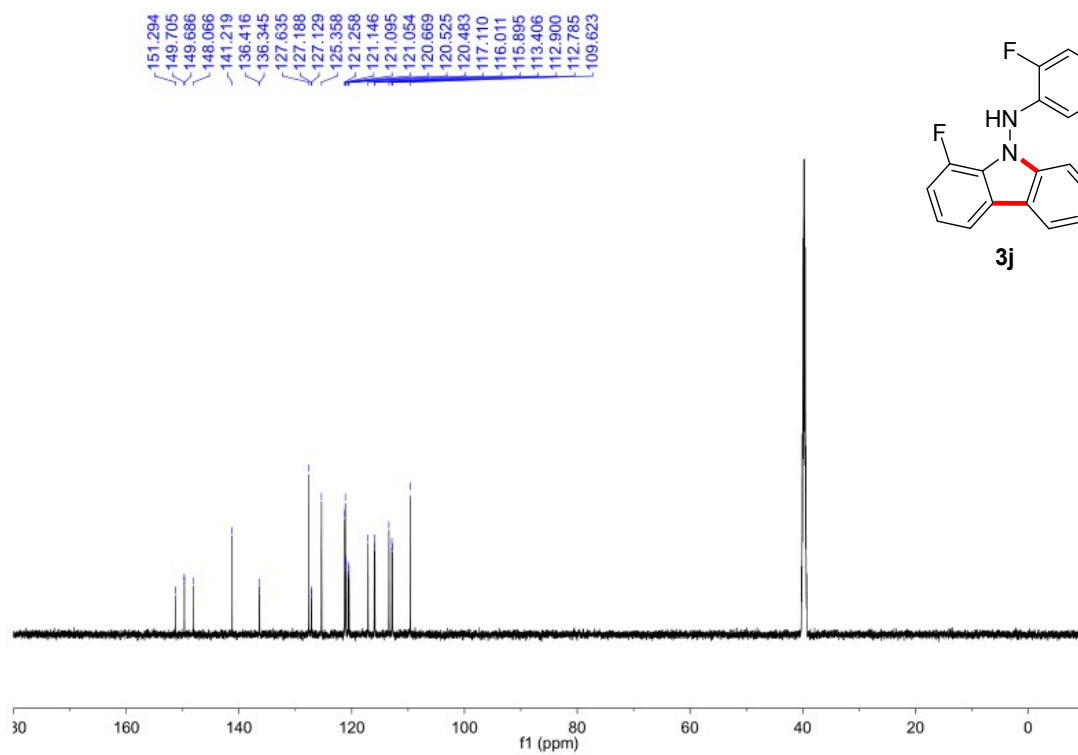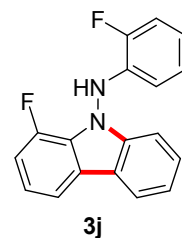

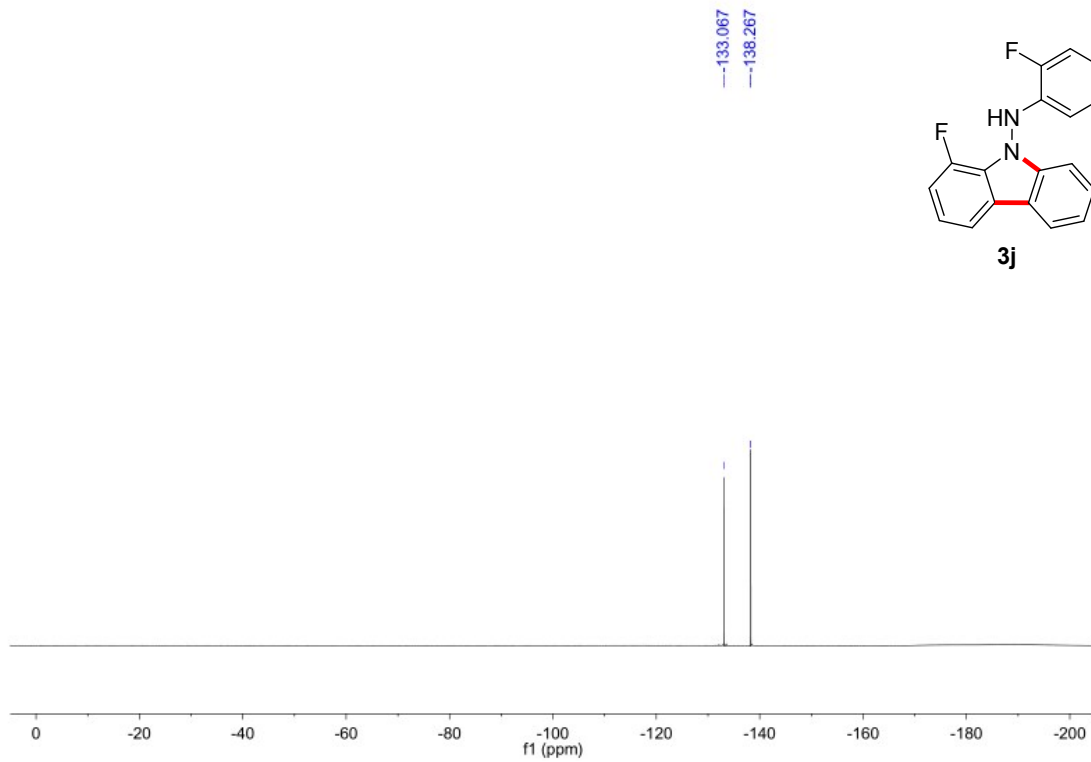

**3k:**  $^1\text{H}$  NMR (600 MHz) and  $^{13}\text{C}$  NMR (150 MHz),  $\text{DMSO-}d_6$

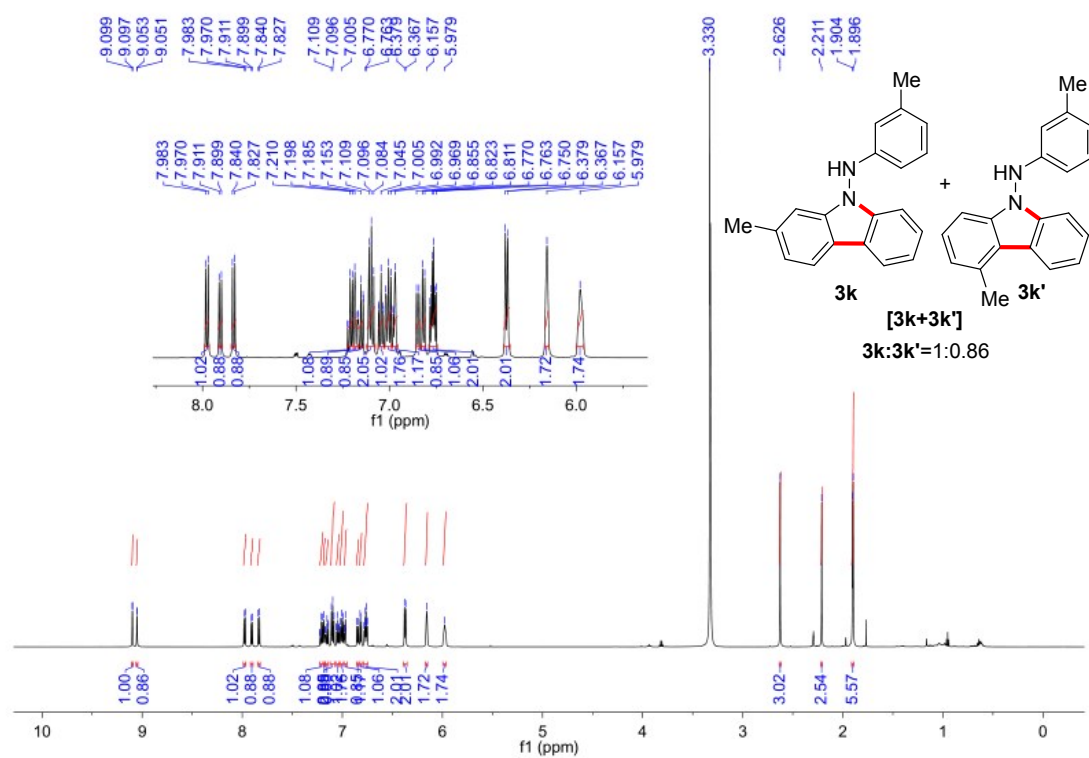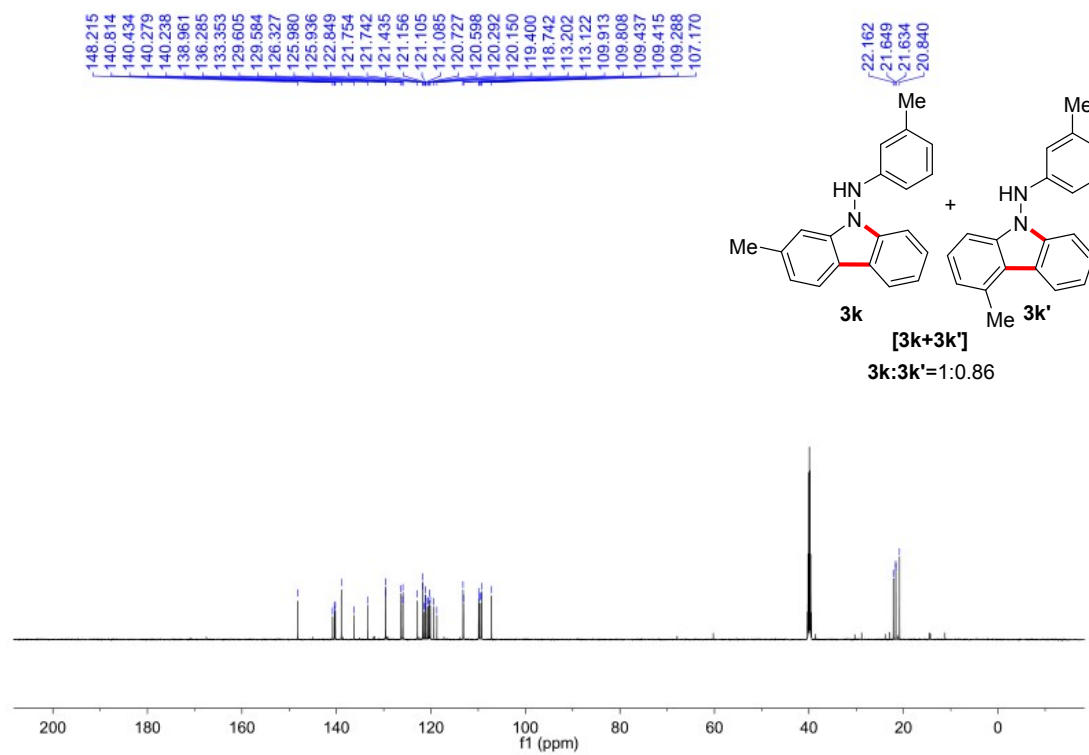

**3I:**  $^1\text{H}$  NMR (600 MHz) and  $^{13}\text{C}$  NMR (150 MHz),  $\text{DMSO-}d_6$

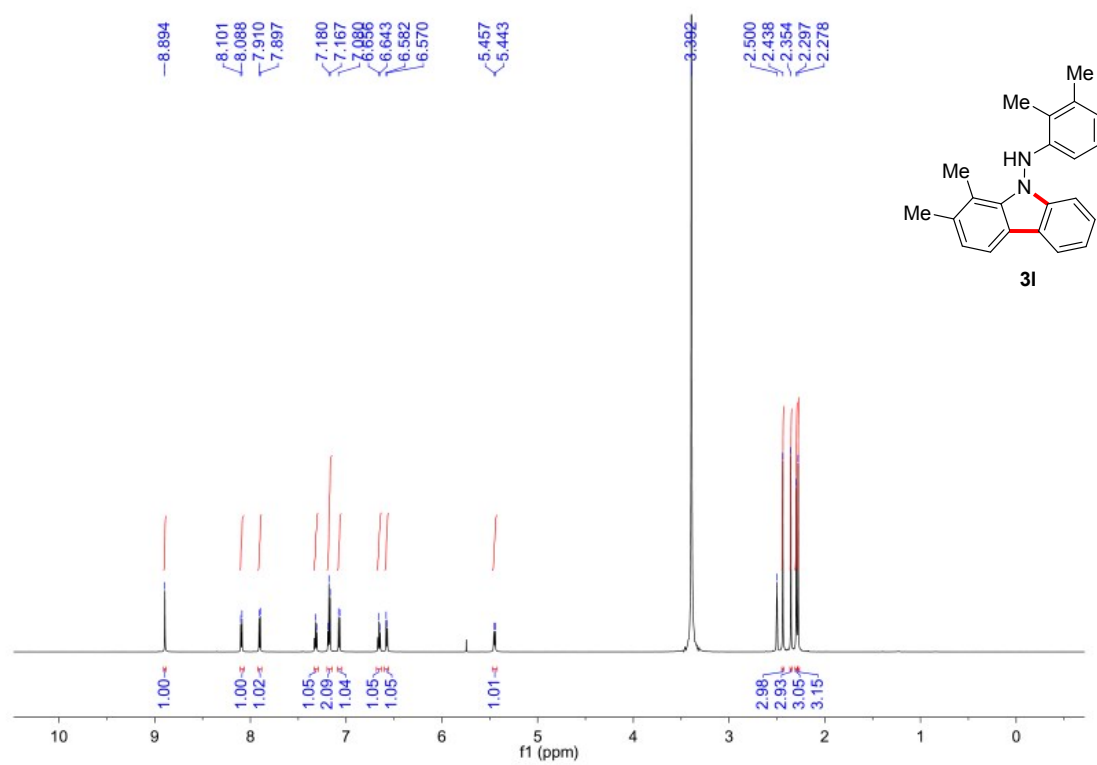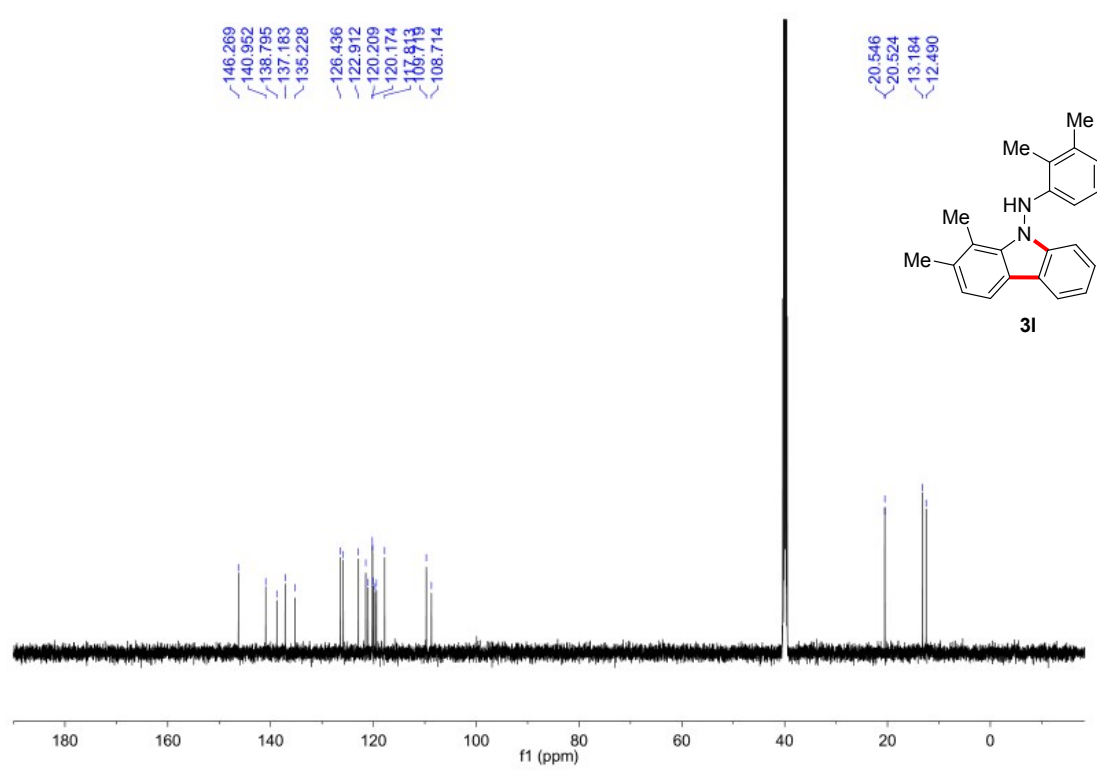

**3m**:  $^1\text{H}$  NMR (600 MHz) and  $^{13}\text{C}$  NMR (150 MHz),  $\text{DMSO-}d_6$

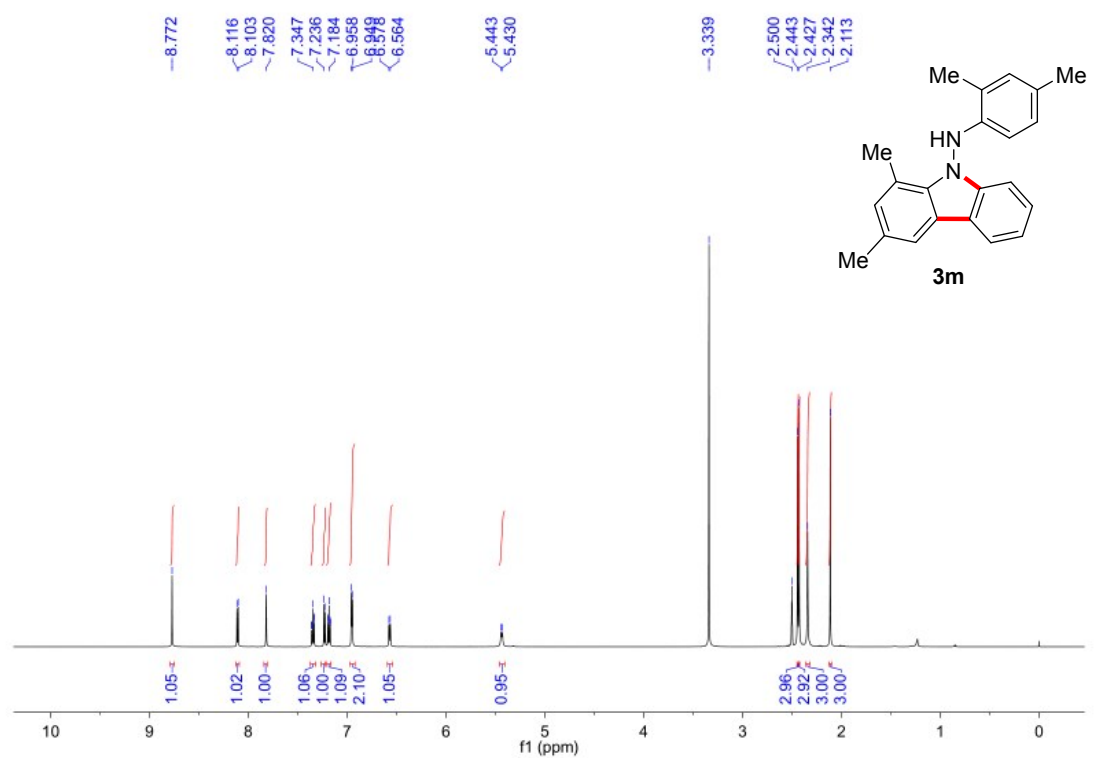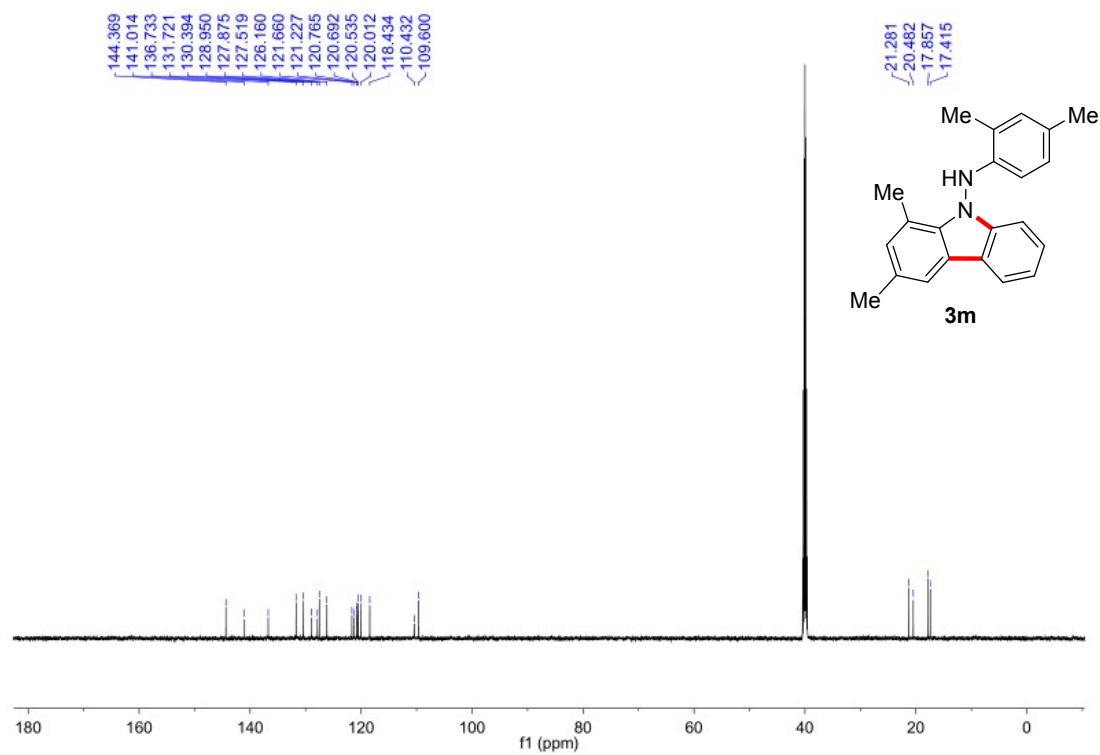

**3n**:  $^1\text{H}$  NMR (600 MHz) and  $^{13}\text{C}$  NMR (150 MHz), acetone- $d_6$

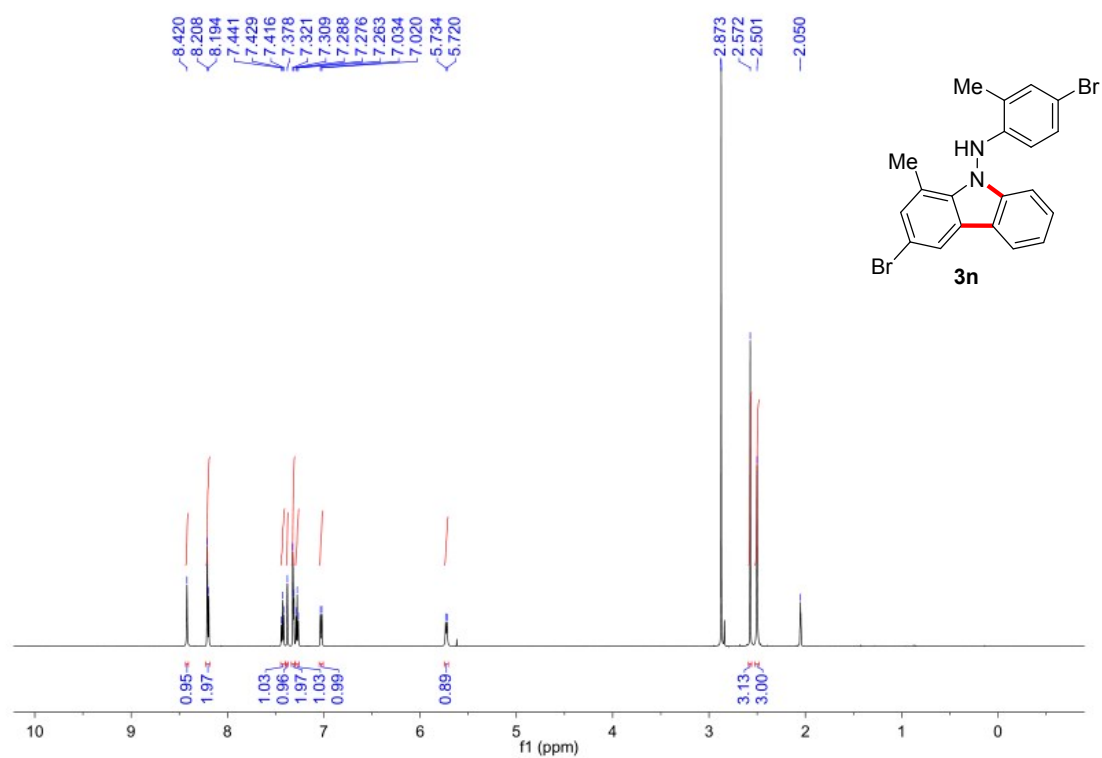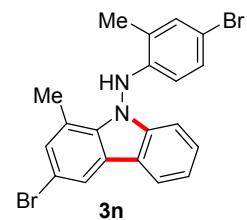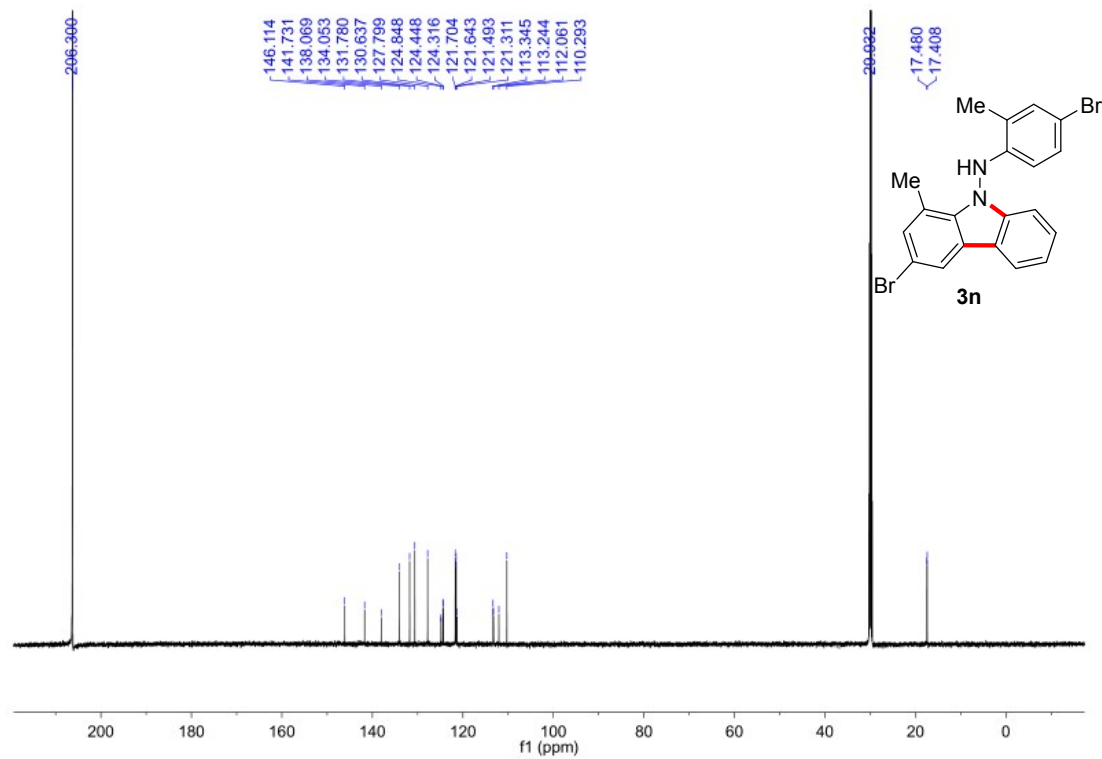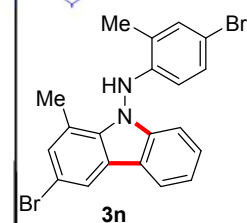

**3o**:  $^1\text{H}$  NMR (600 MHz) and  $^{13}\text{C}$  NMR (150 MHz),  $\text{DMSO-}d_6$

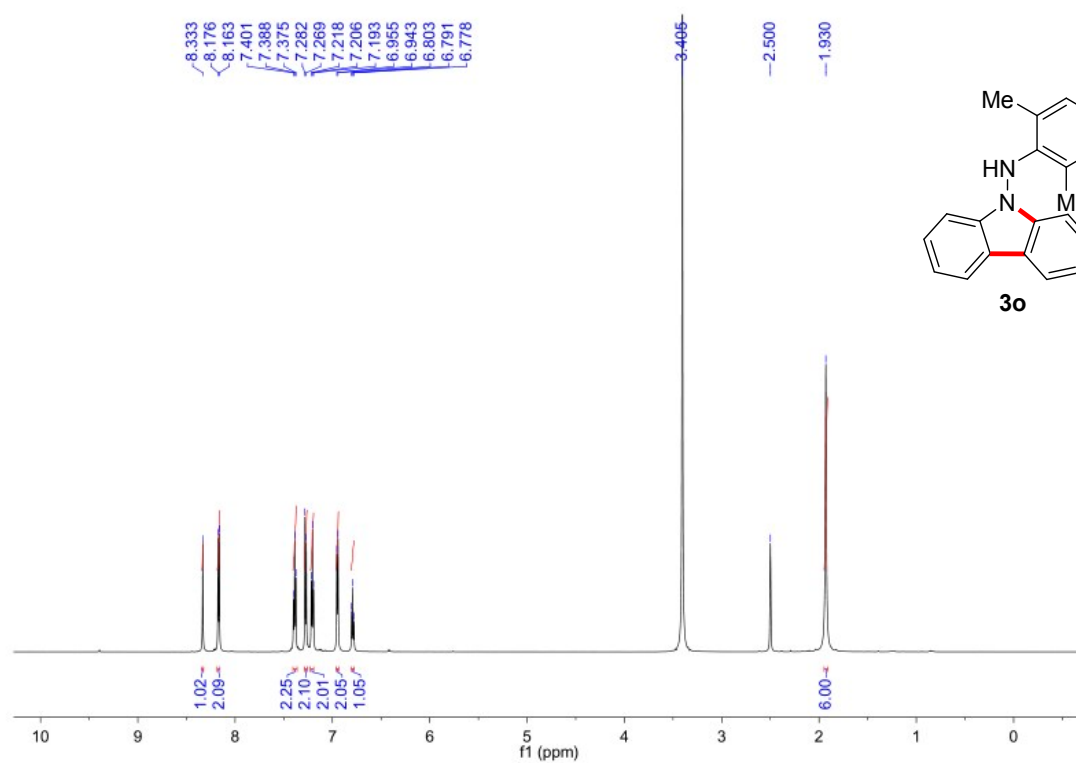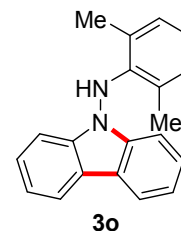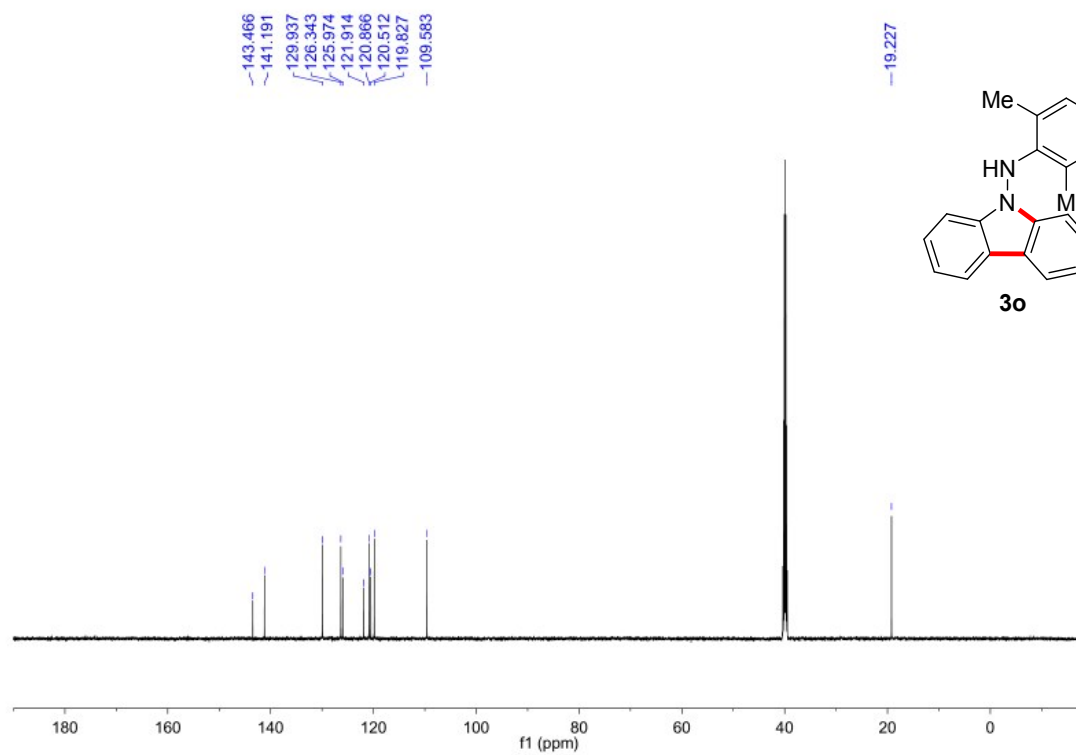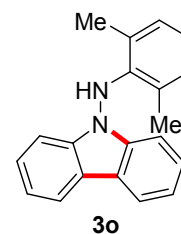



**3p**:  $^1\text{H}$  NMR (600 MHz) and  $^{13}\text{C}$  NMR (150 MHz),  $\text{DMSO-}d_6$

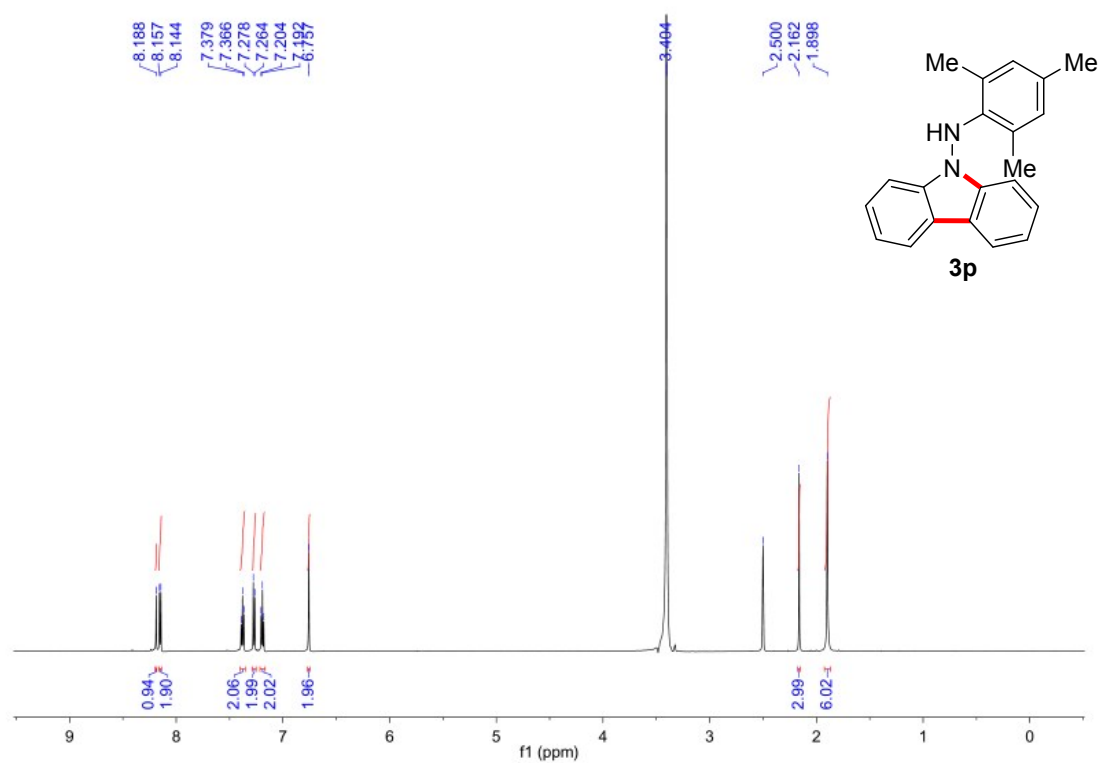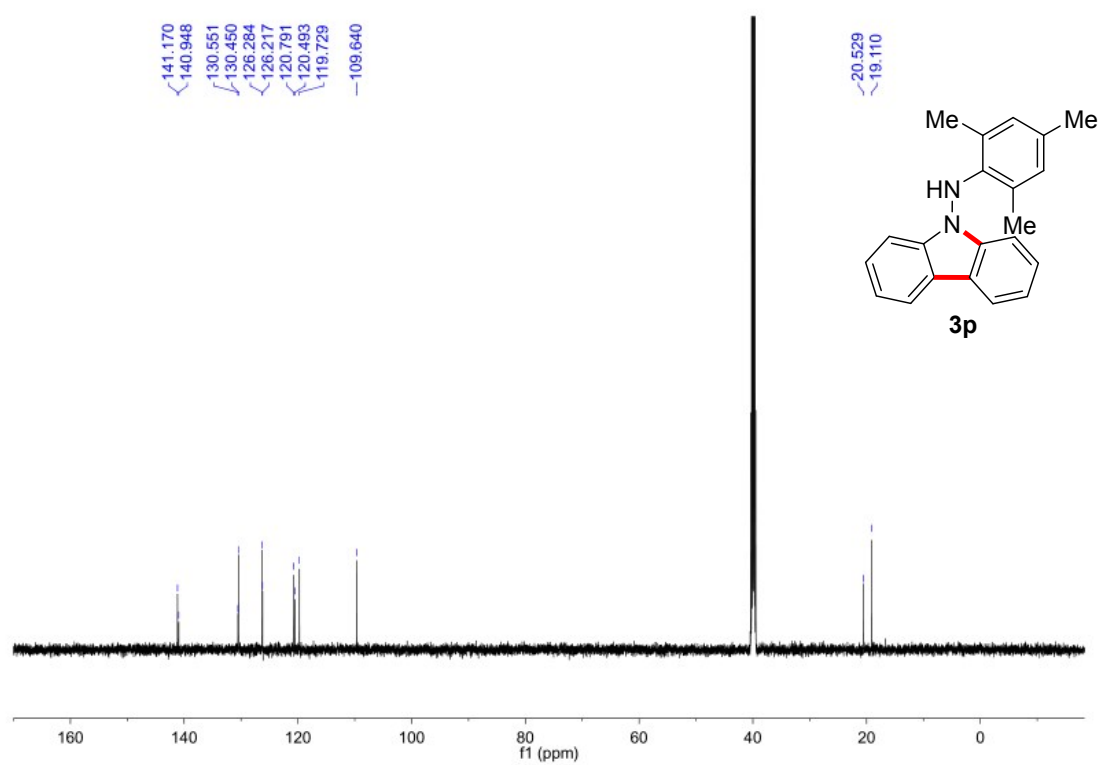

**3q**:  $^1\text{H}$  NMR (600 MHz) and  $^{13}\text{C}$  NMR (150 MHz),  $\text{DMSO-}d_6$

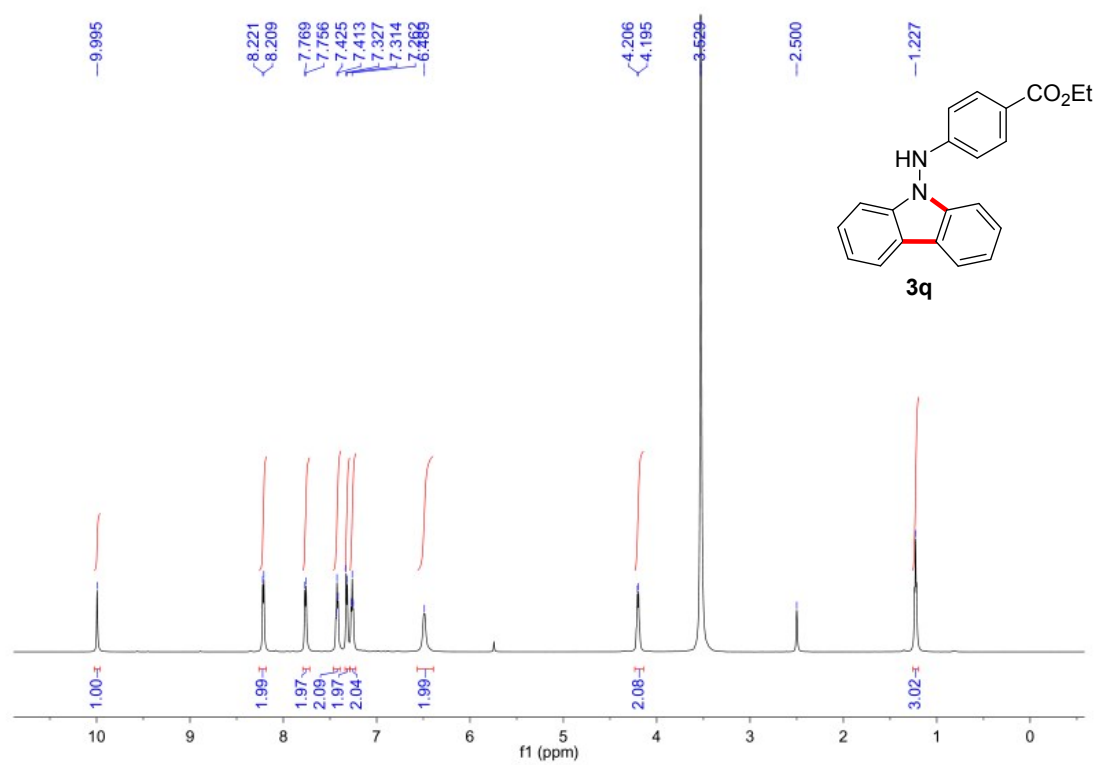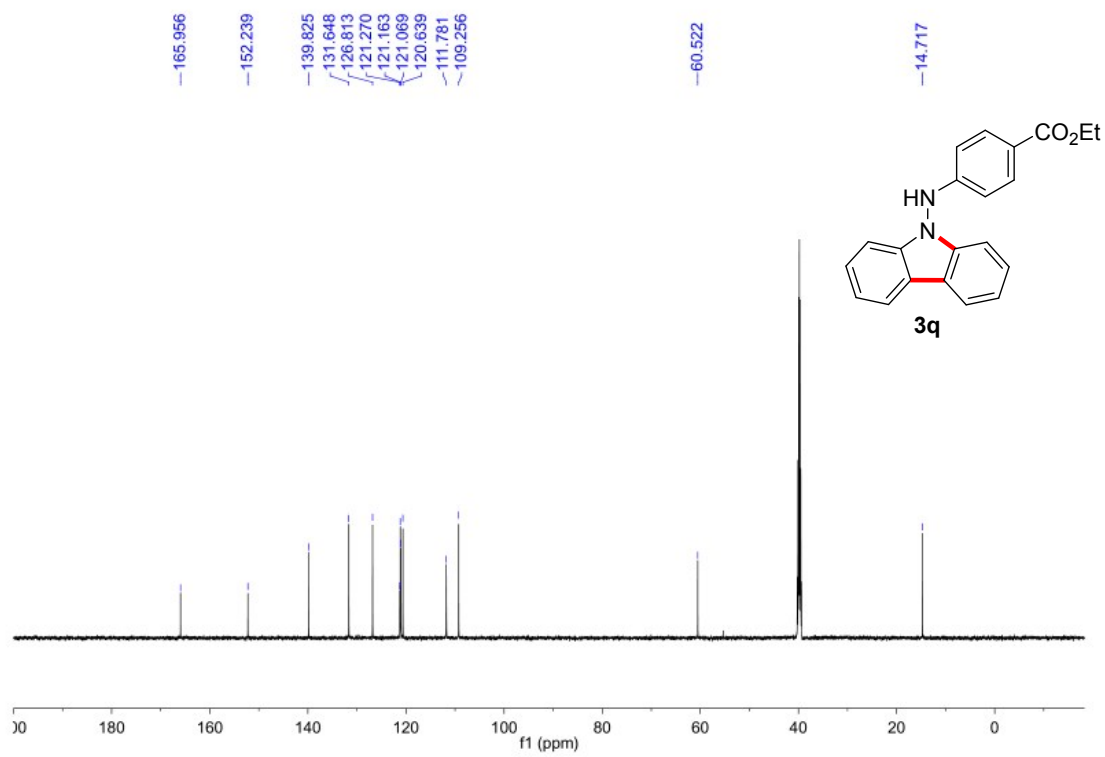

**3r**:  $^1\text{H}$  NMR (600 MHz) and  $^{13}\text{C}$  NMR (150 MHz),  $\text{DMSO-}d_6$

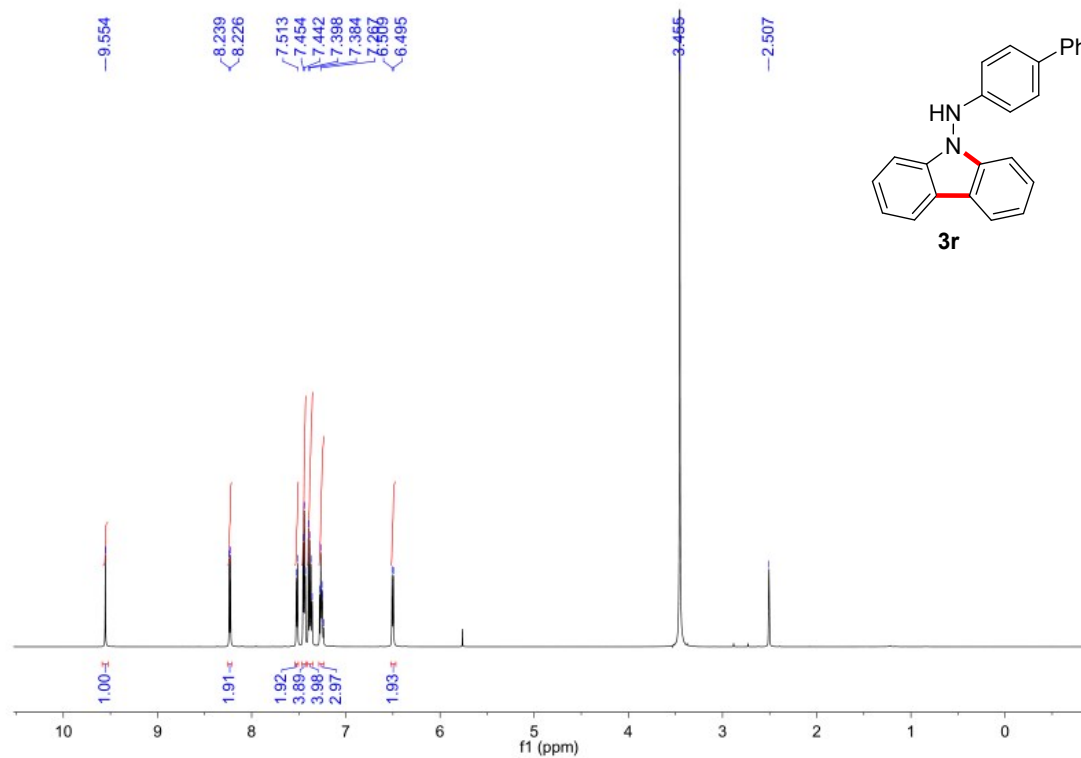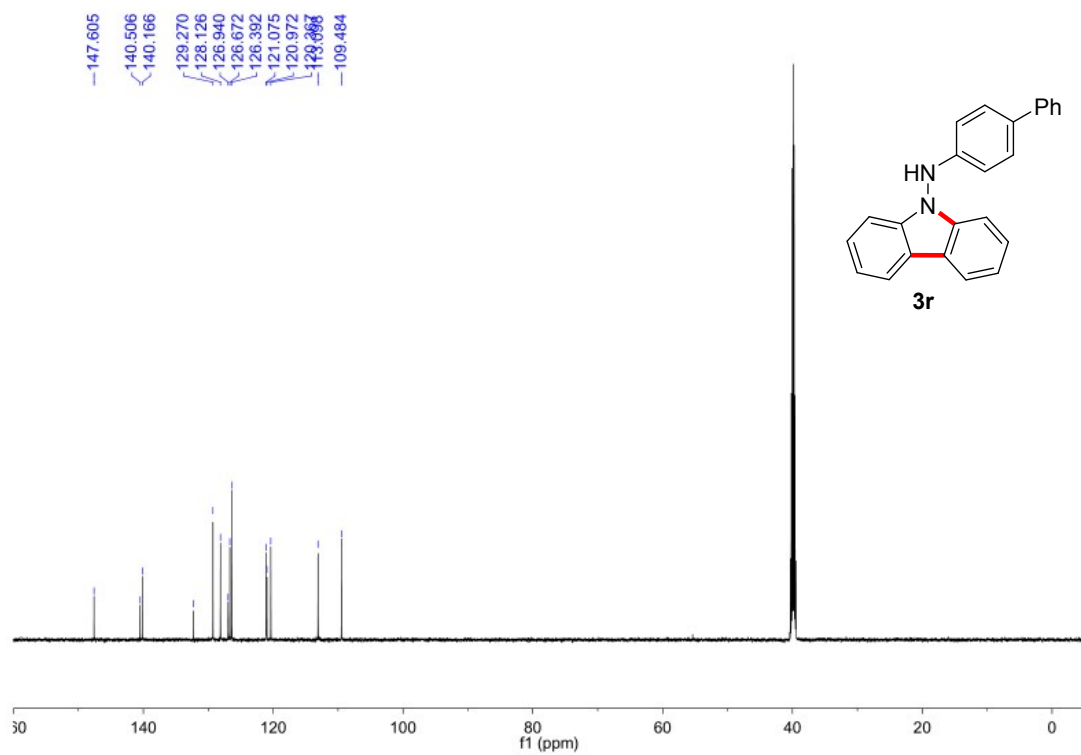

**3s**:  $^1\text{H}$  NMR (600 MHz),  $^{13}\text{C}$  NMR (150 MHz) and  $^{19}\text{F}$  NMR (565 MHz),  $\text{DMSO-}d_6$

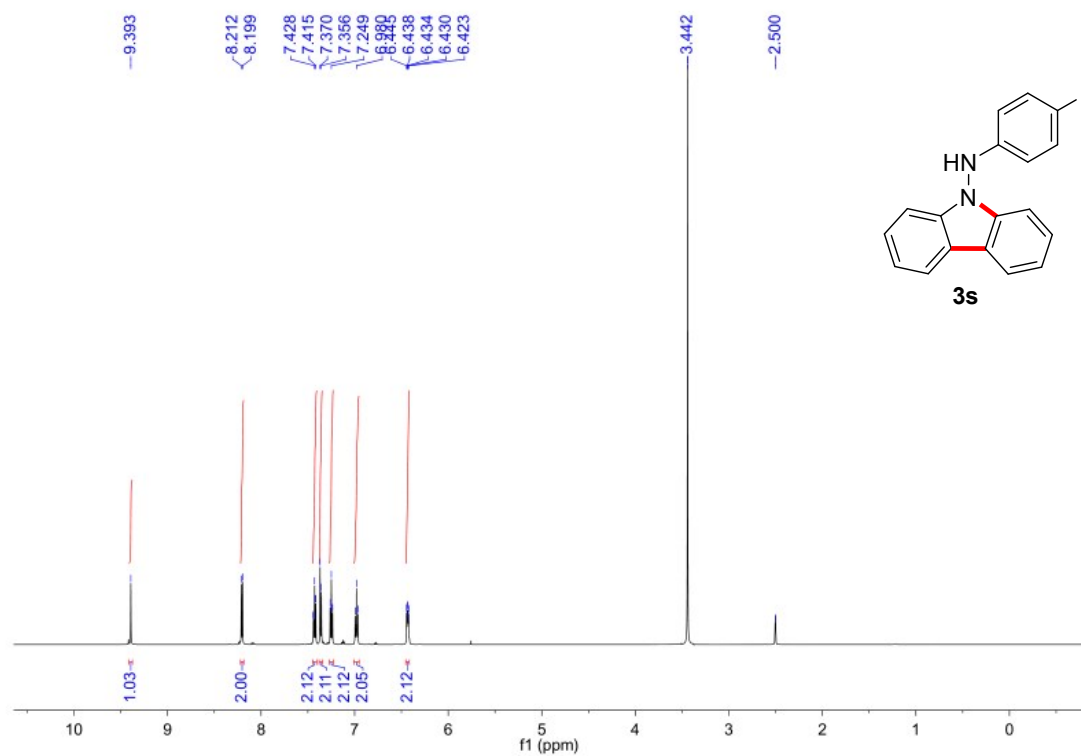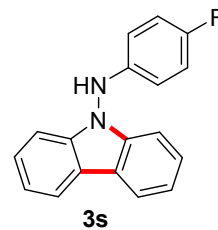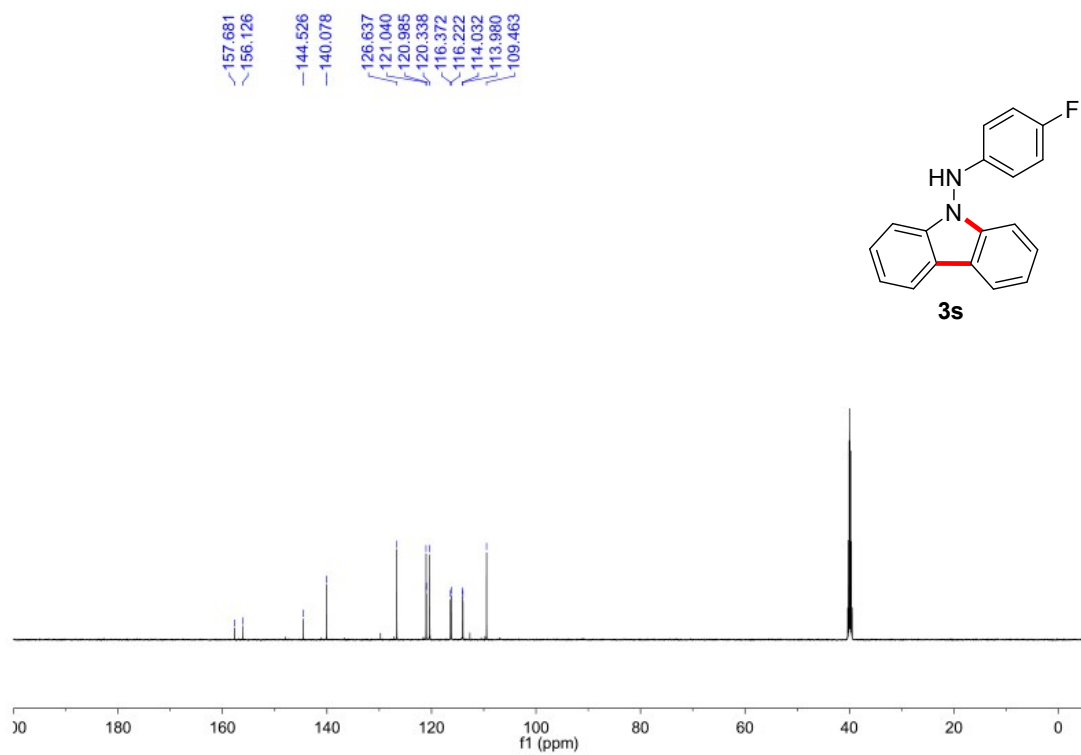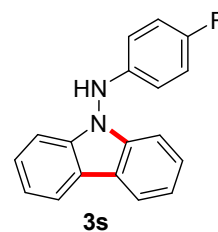

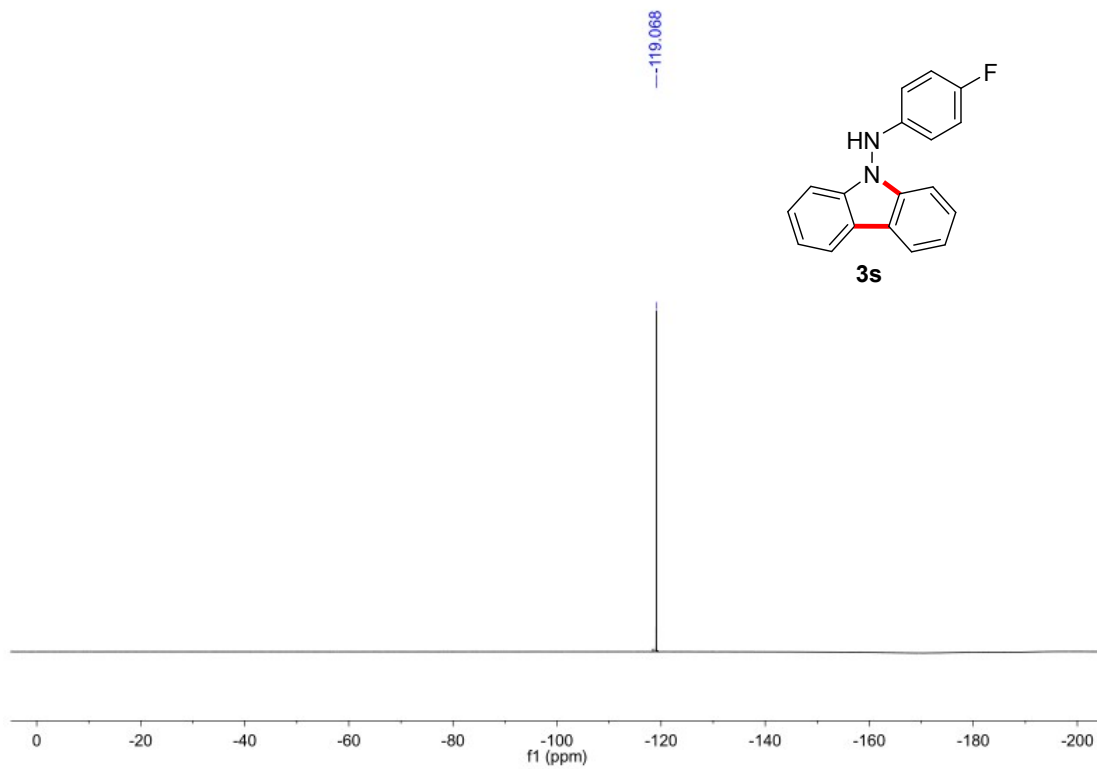

**3t**:  $^1\text{H}$  NMR (600 MHz) and  $^{13}\text{C}$  NMR (150 MHz),  $\text{CDCl}_3$

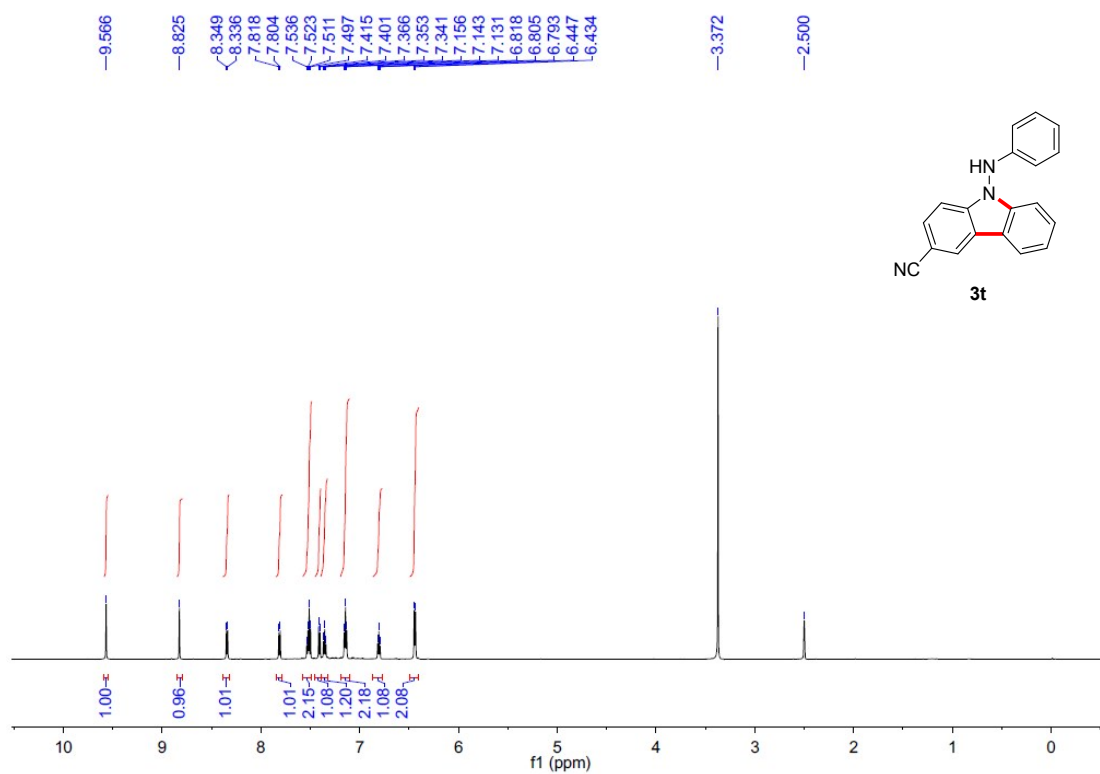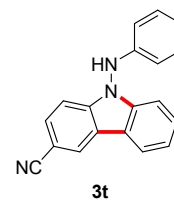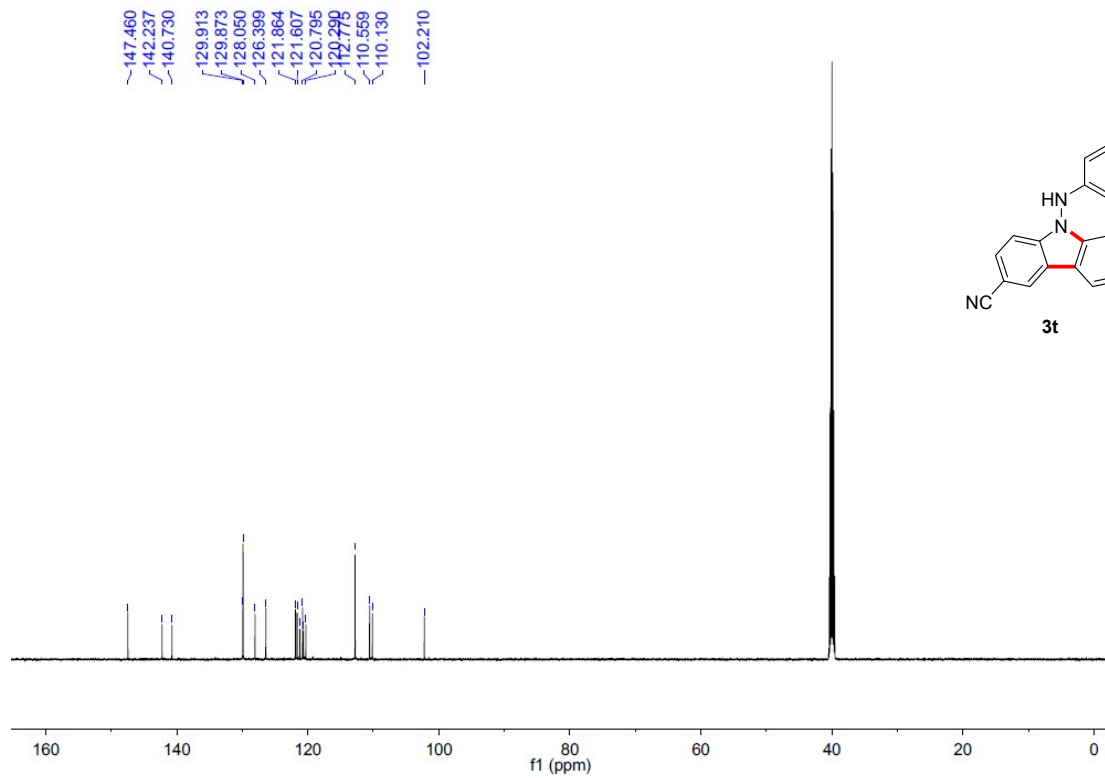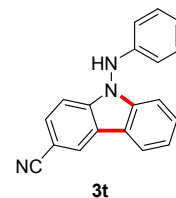

**3u**:  $^1\text{H}$  NMR (600 MHz) and  $^{13}\text{C}$  NMR (150 MHz),  $\text{CDCl}_3$

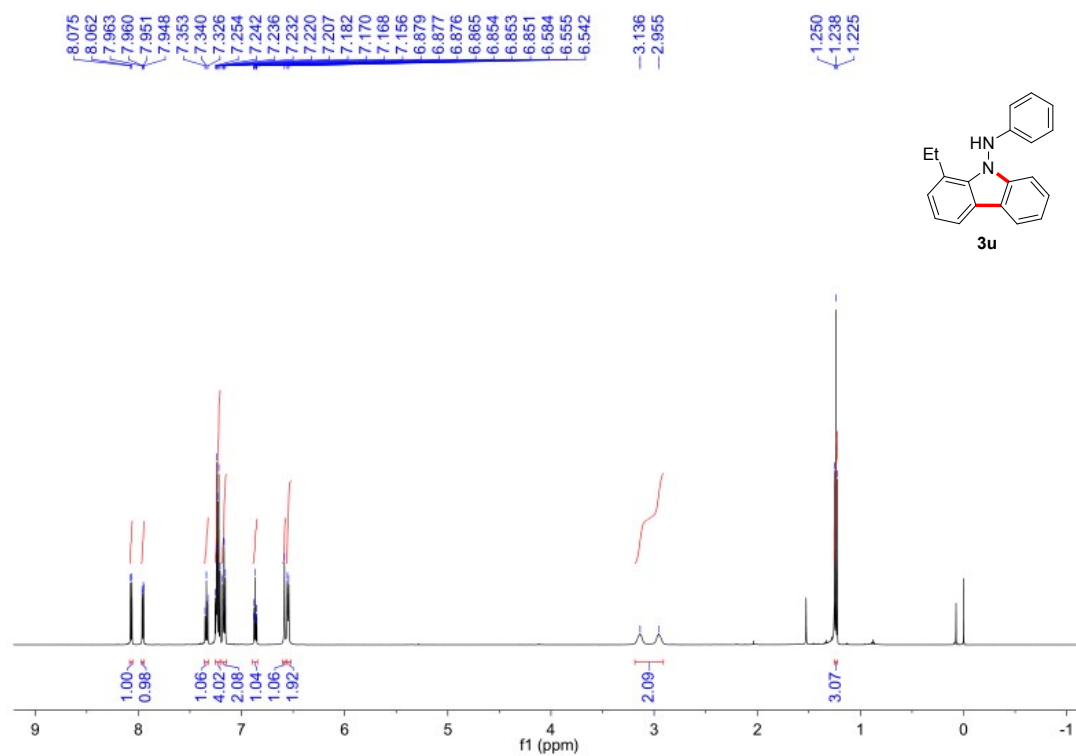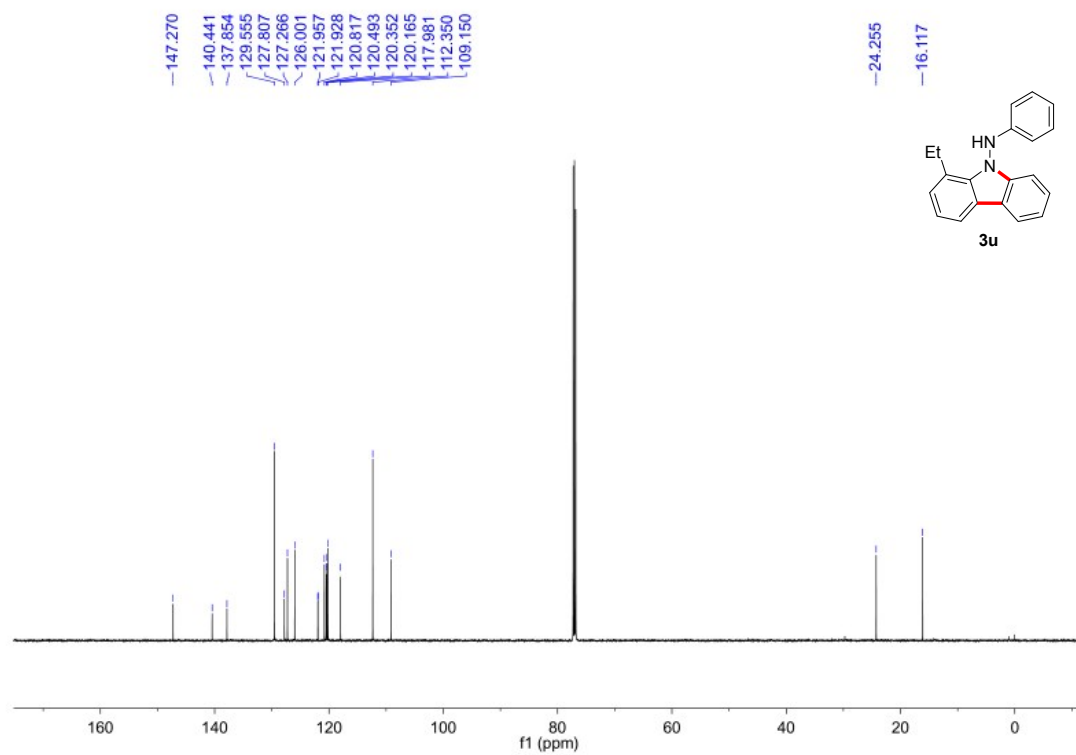

**4a:**  $^1\text{H}$  NMR (600 MHz) and  $^{13}\text{C}$  NMR (150 MHz),  $\text{CDCl}_3$

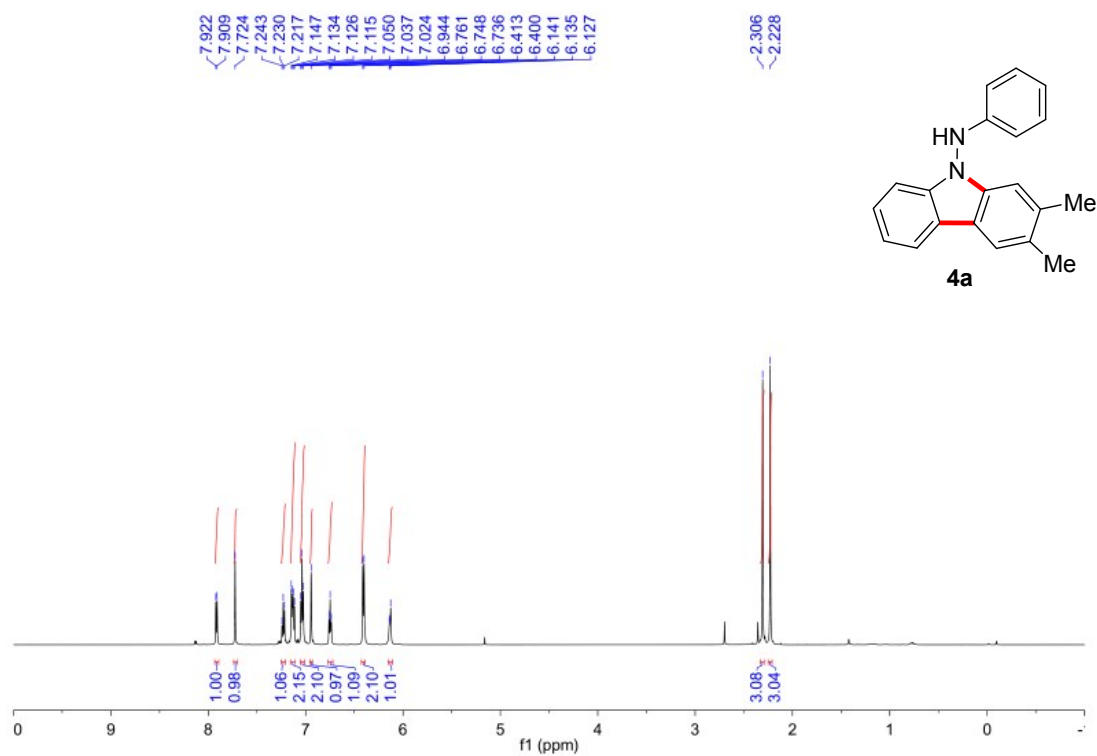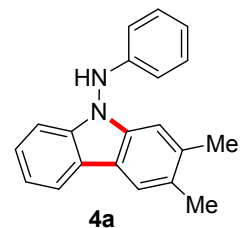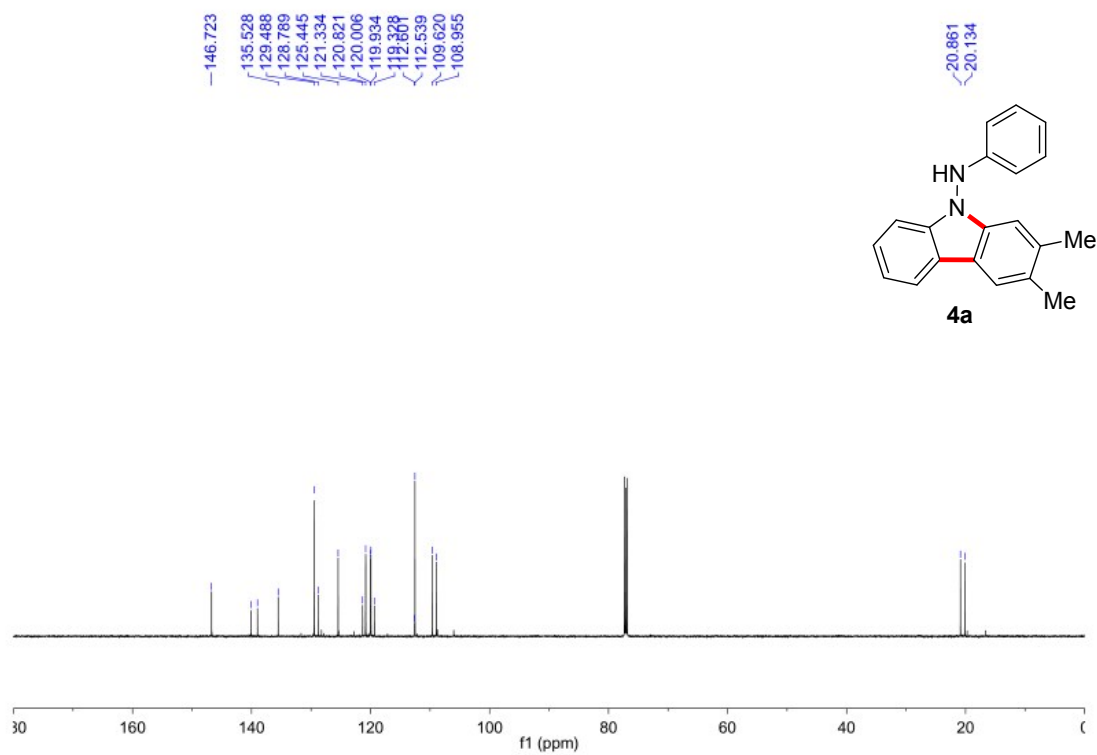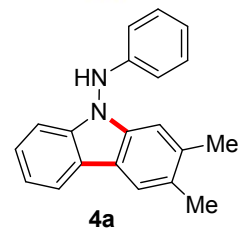



**4b:**  $^1\text{H}$  NMR (600 MHz) and  $^{13}\text{C}$  NMR (150 MHz),  $\text{DMSO-}d_6$

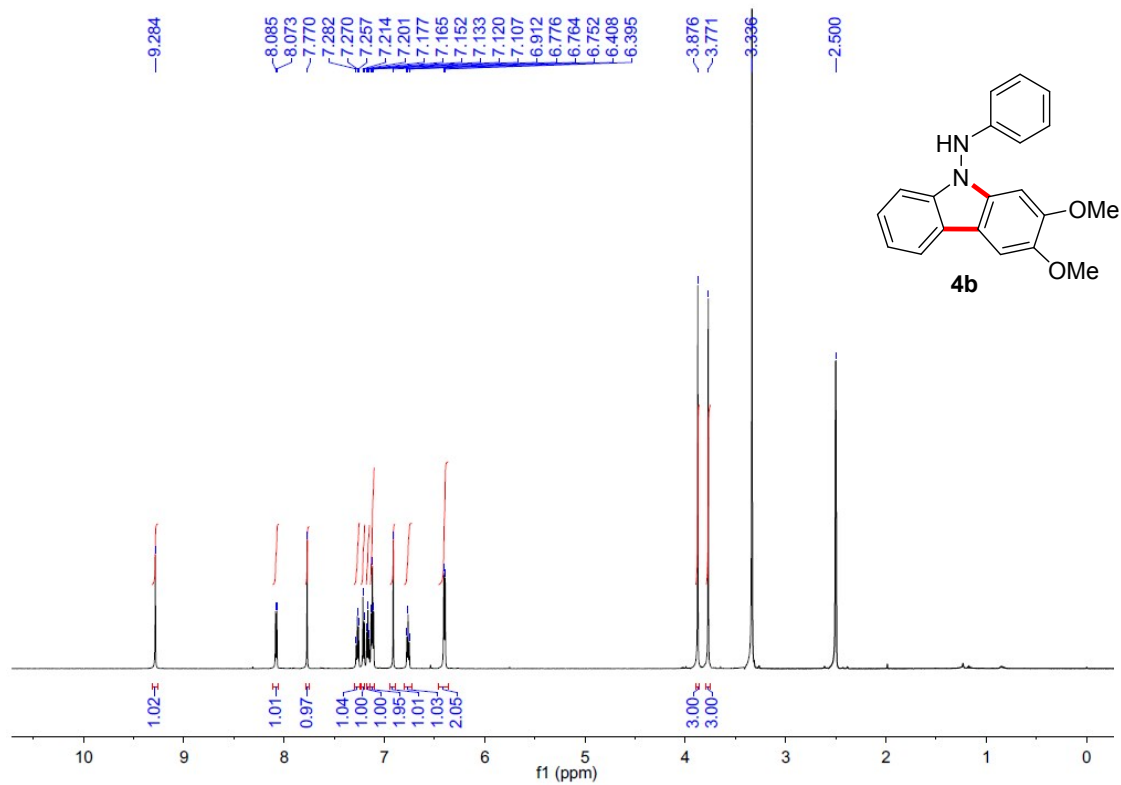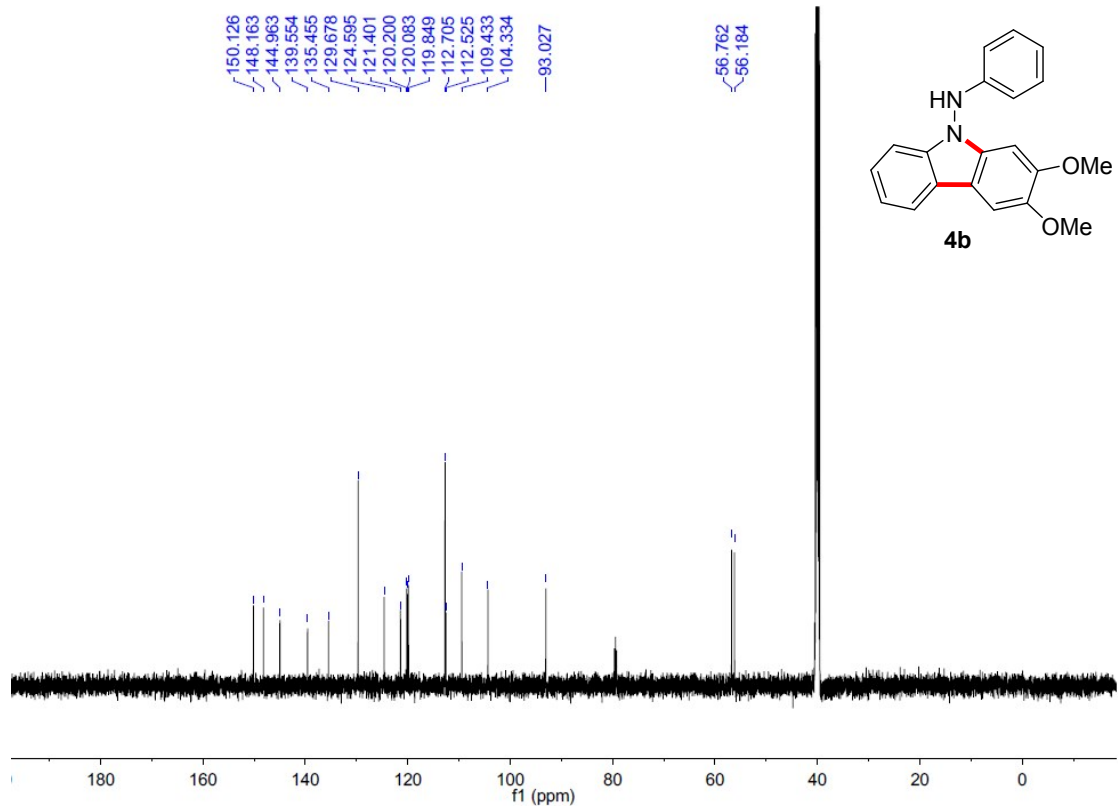

**4c:**  $^1\text{H}$  NMR (600 MHz) and  $^{13}\text{C}$  NMR (150 MHz),  $\text{CDCl}_3$

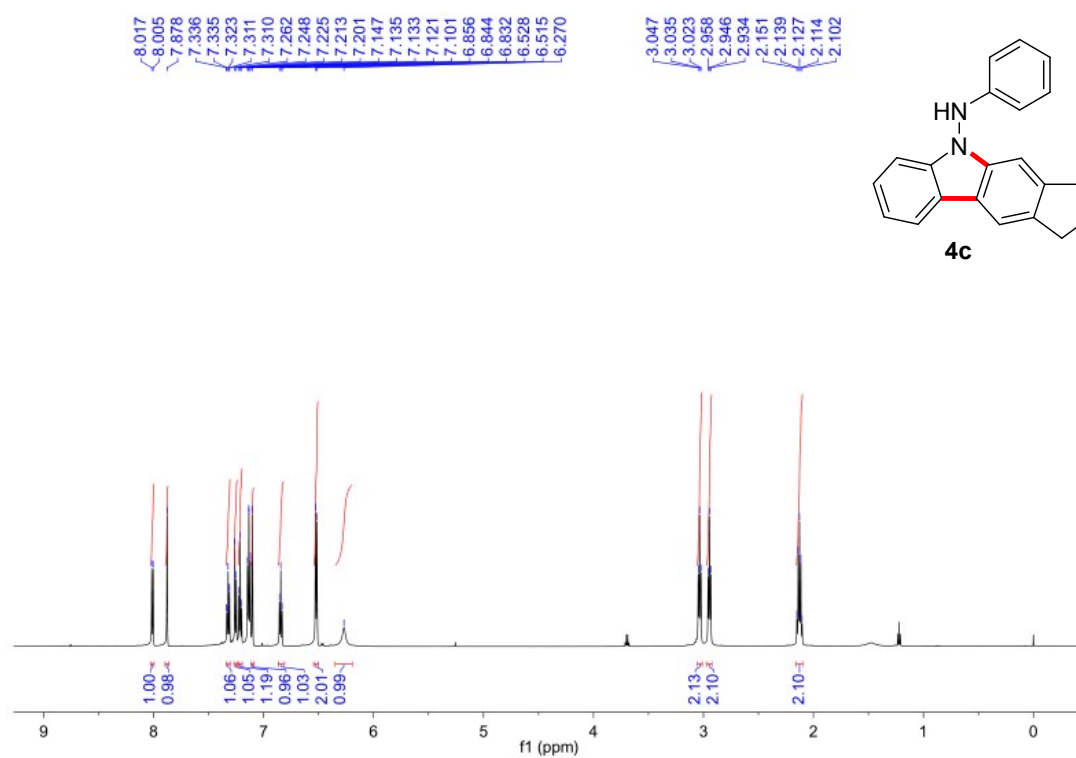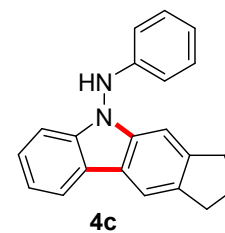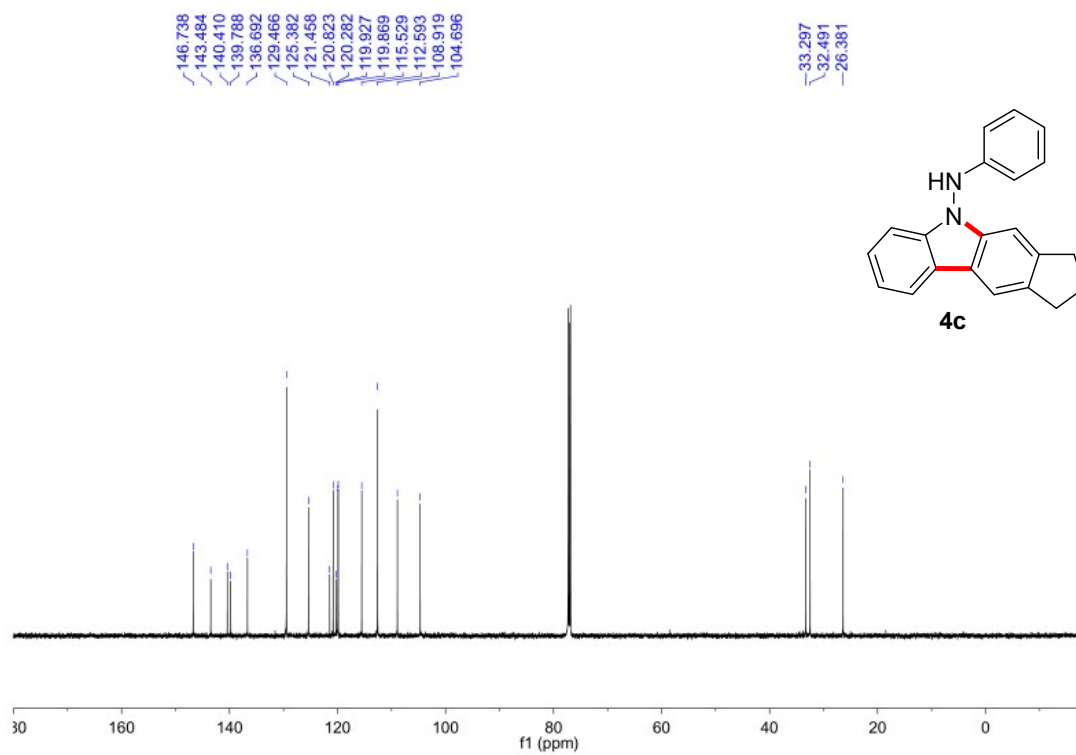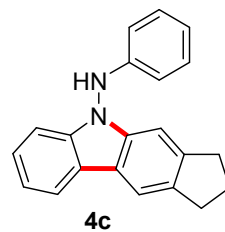

**4d:**  $^1\text{H}$  NMR (600 MHz) and  $^{13}\text{C}$  NMR (150 MHz),  $\text{DMSO-}d_6$

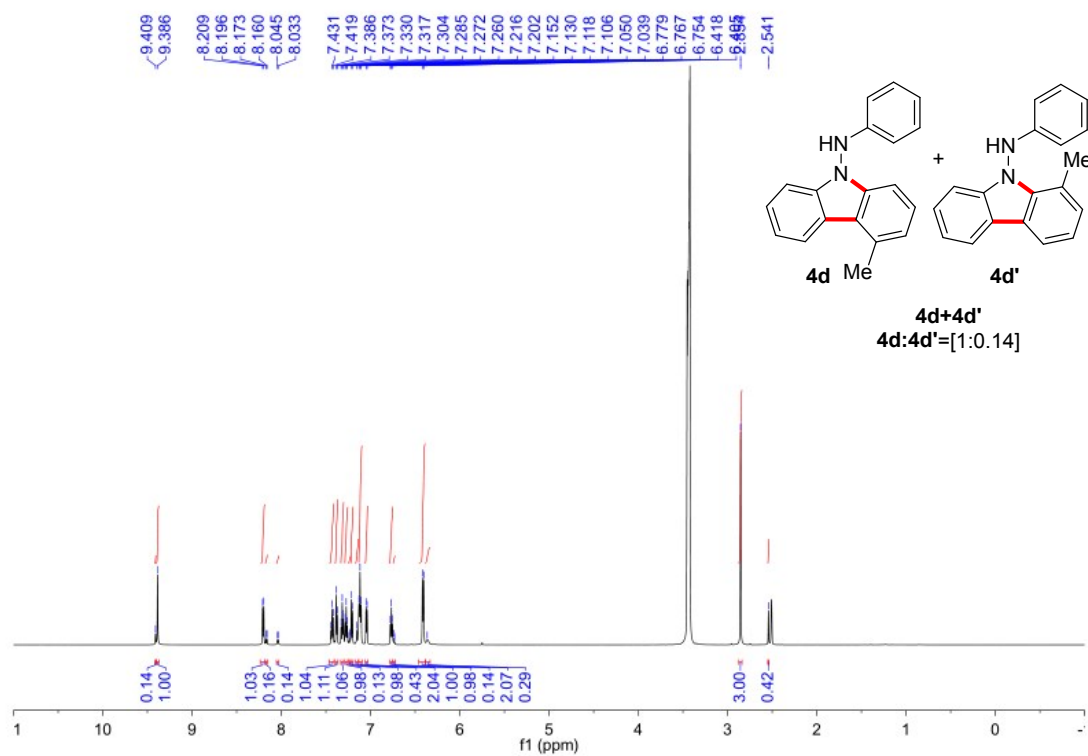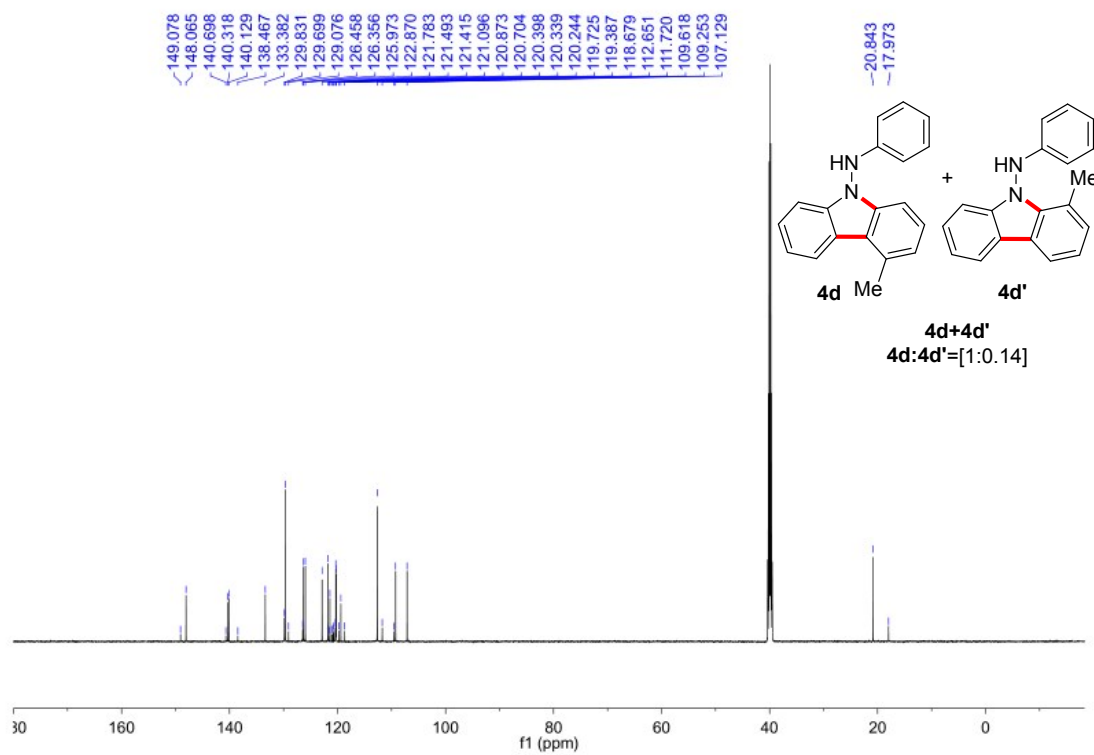

4e:  $^1\text{H}$  NMR (600 MHz) and  $^{13}\text{C}$  NMR (150 MHz),  $\text{CDCl}_3$

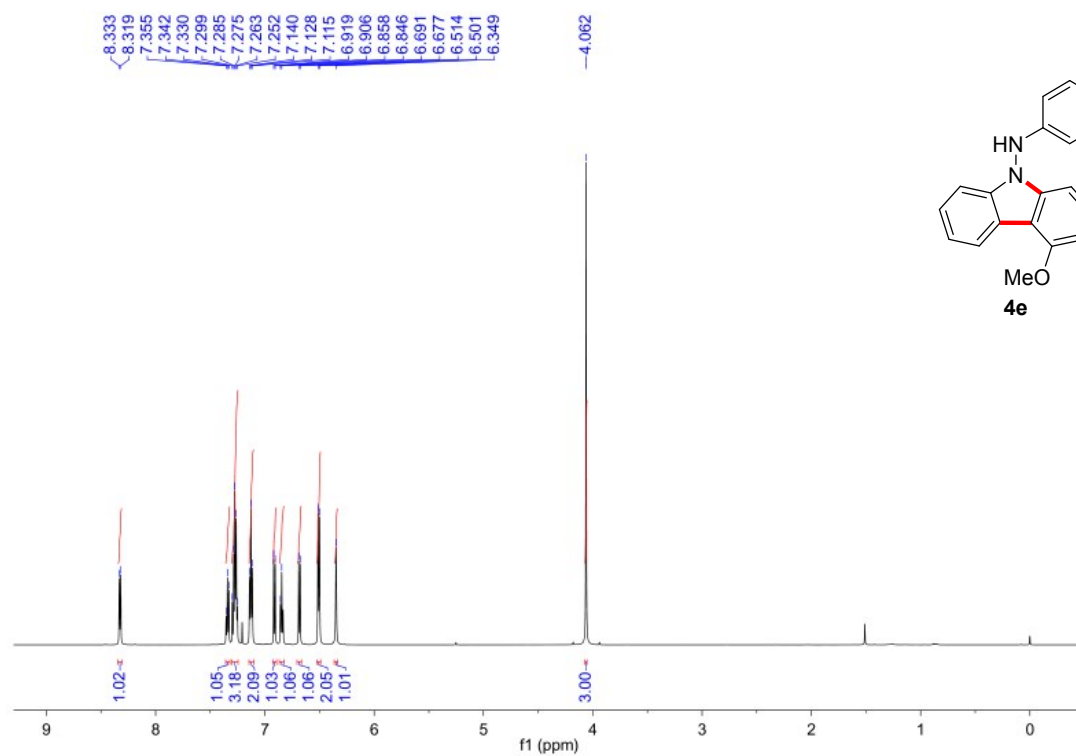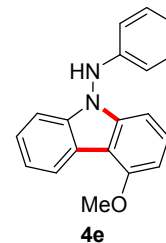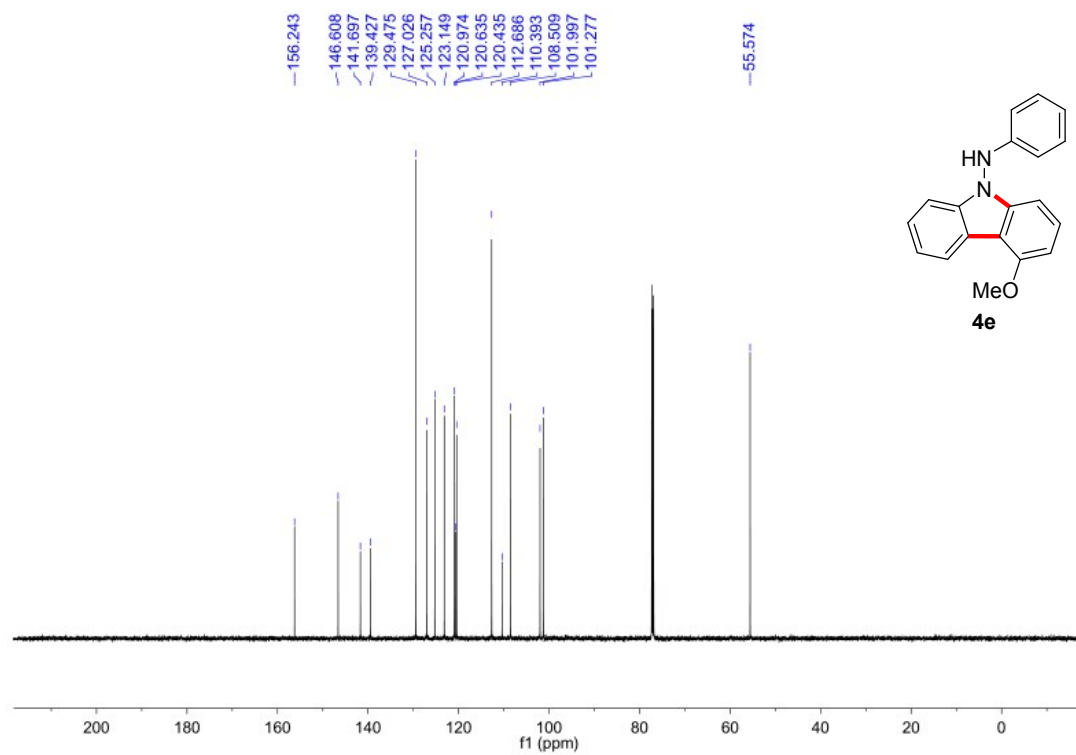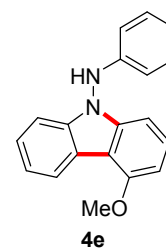

4f:  $^1\text{H}$  NMR (600 MHz) and  $^{13}\text{C}$  NMR (150 MHz),  $\text{CDCl}_3$

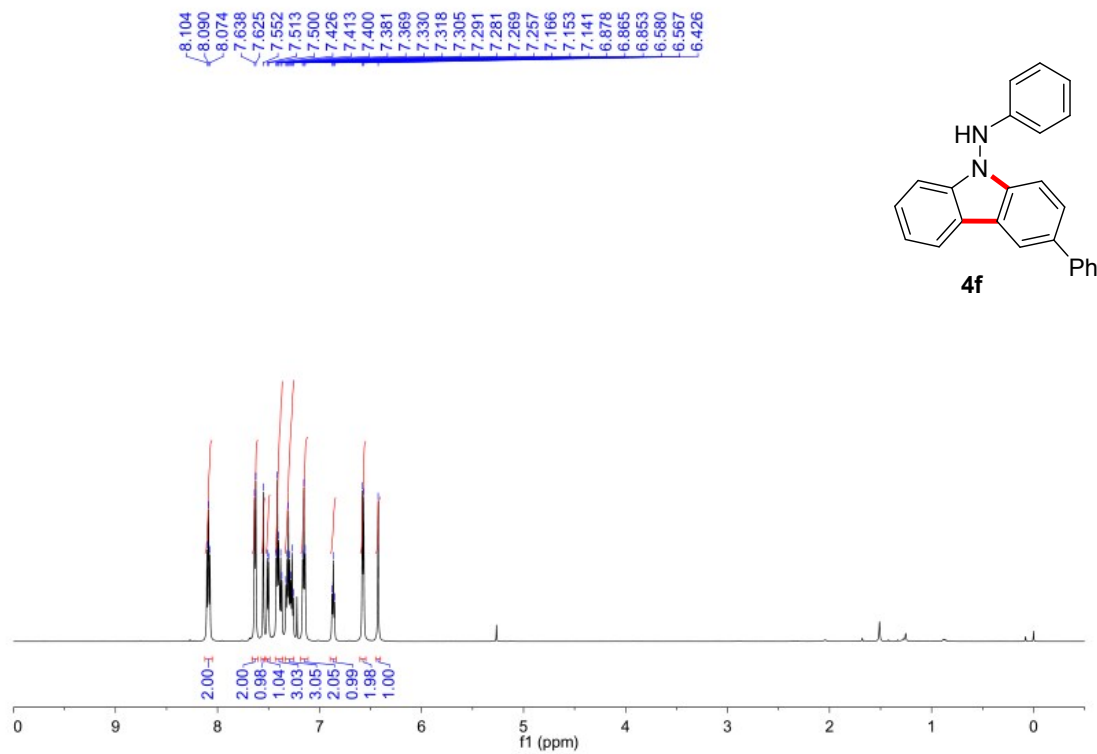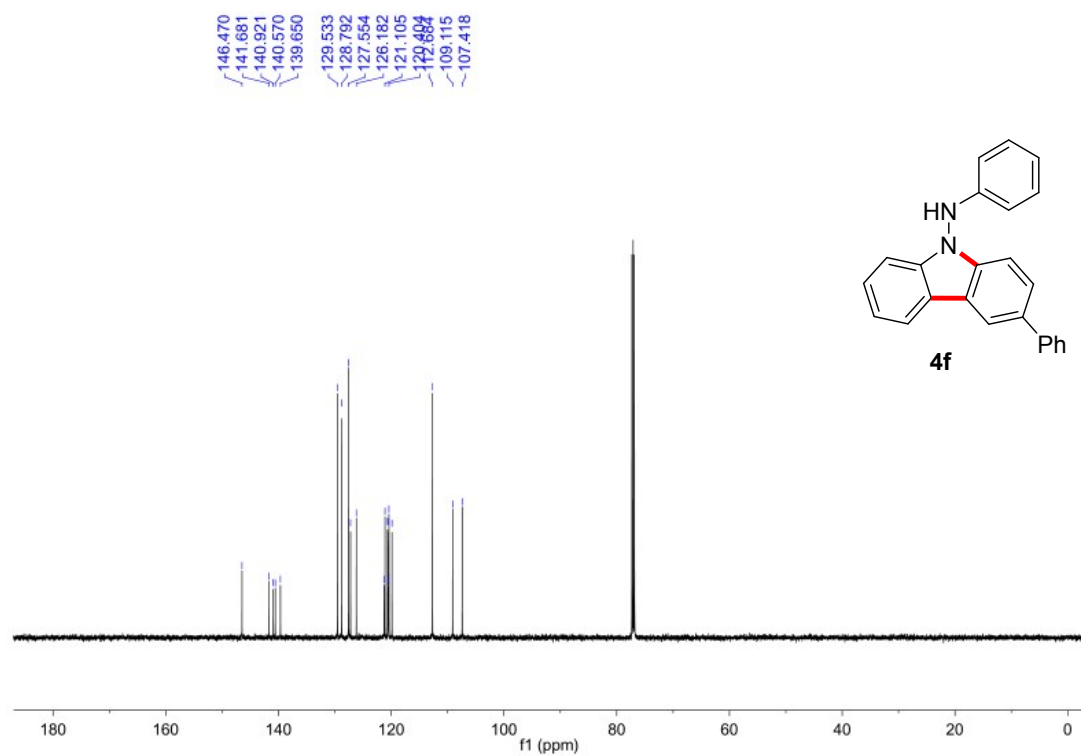

**4g**:  $^1\text{H}$  NMR (600 MHz) and  $^{13}\text{C}$  NMR (150 MHz),  $\text{CDCl}_3$

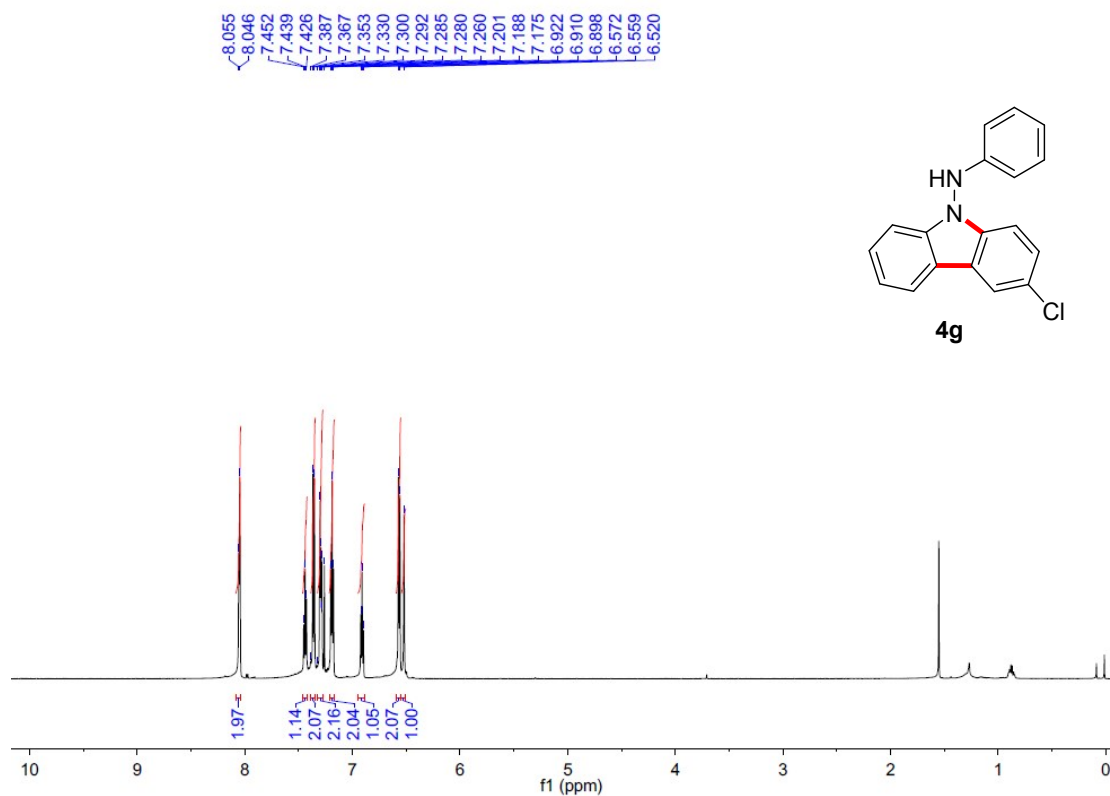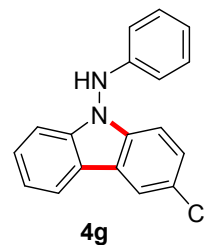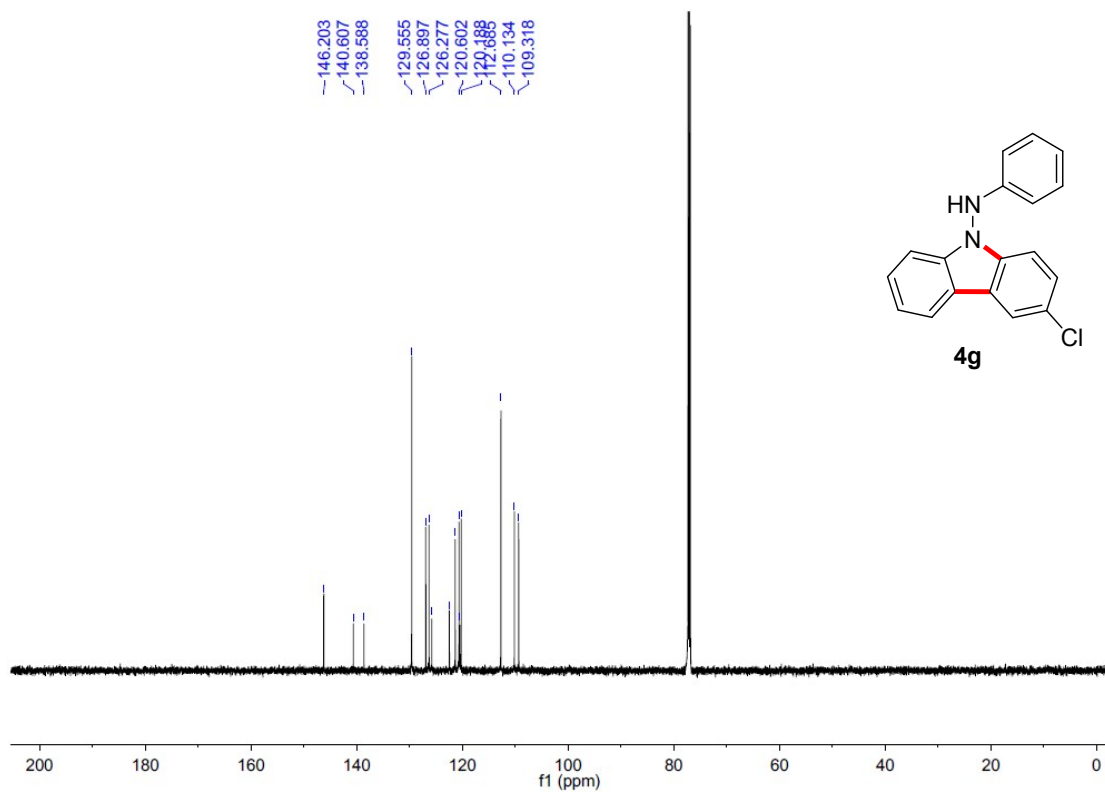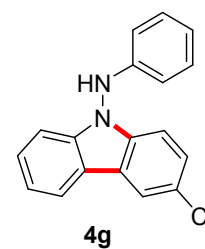

**4h:**  $^1\text{H}$  NMR (600 MHz) and  $^{13}\text{C}$  NMR (150 MHz),  $\text{DMSO-}d_6$

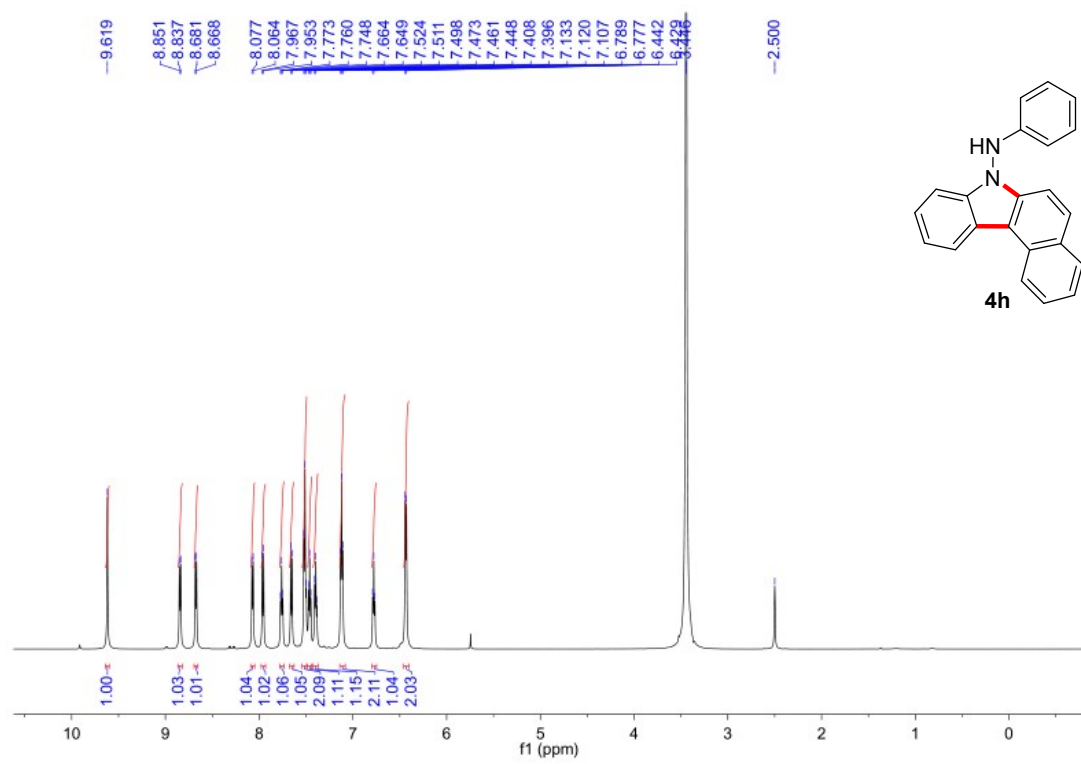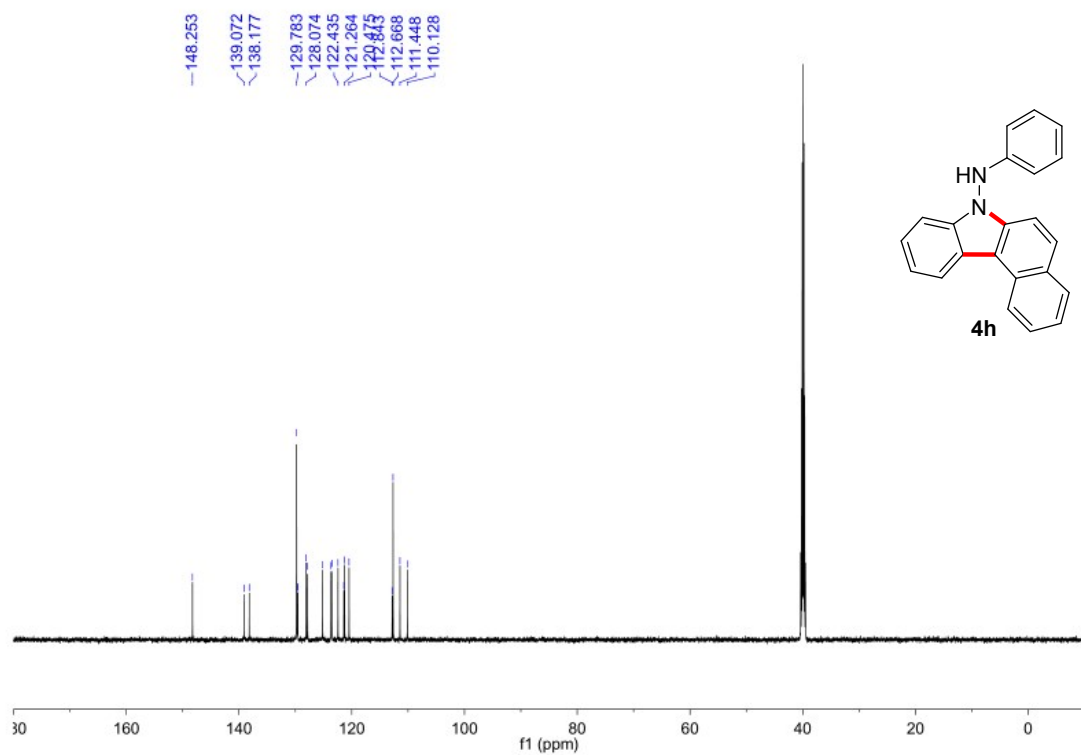

**5a:**  $^1\text{H}$  NMR (600 MHz) and  $^{13}\text{C}$  NMR (150 MHz),  $\text{DMSO-}d_6$

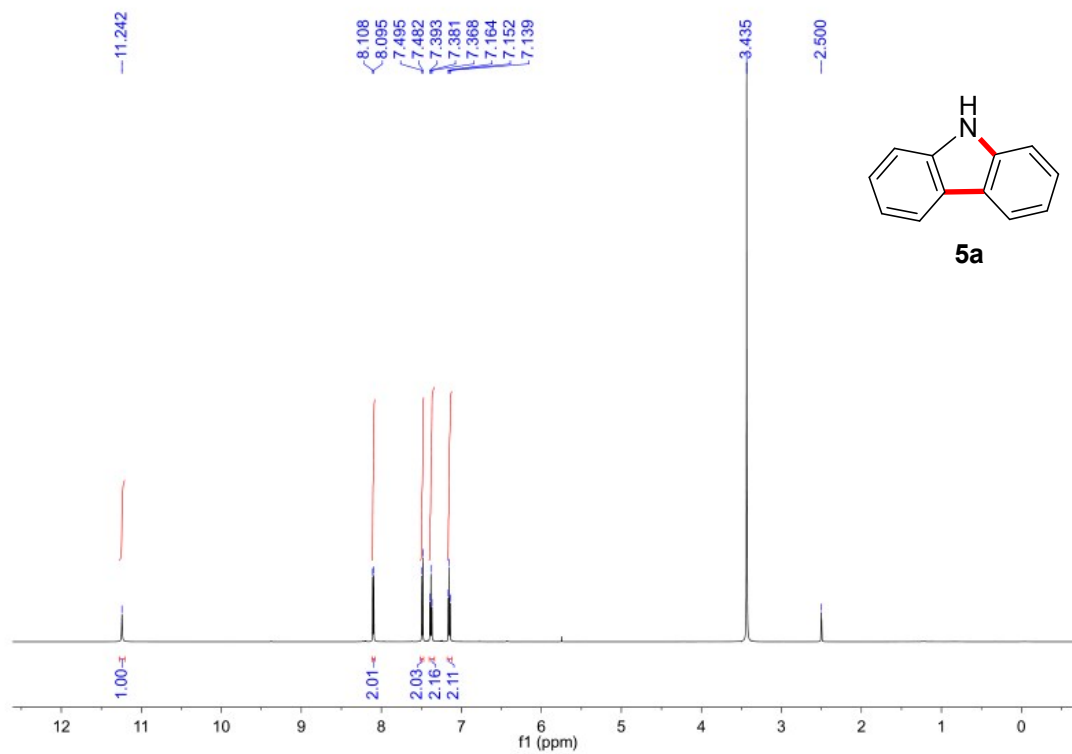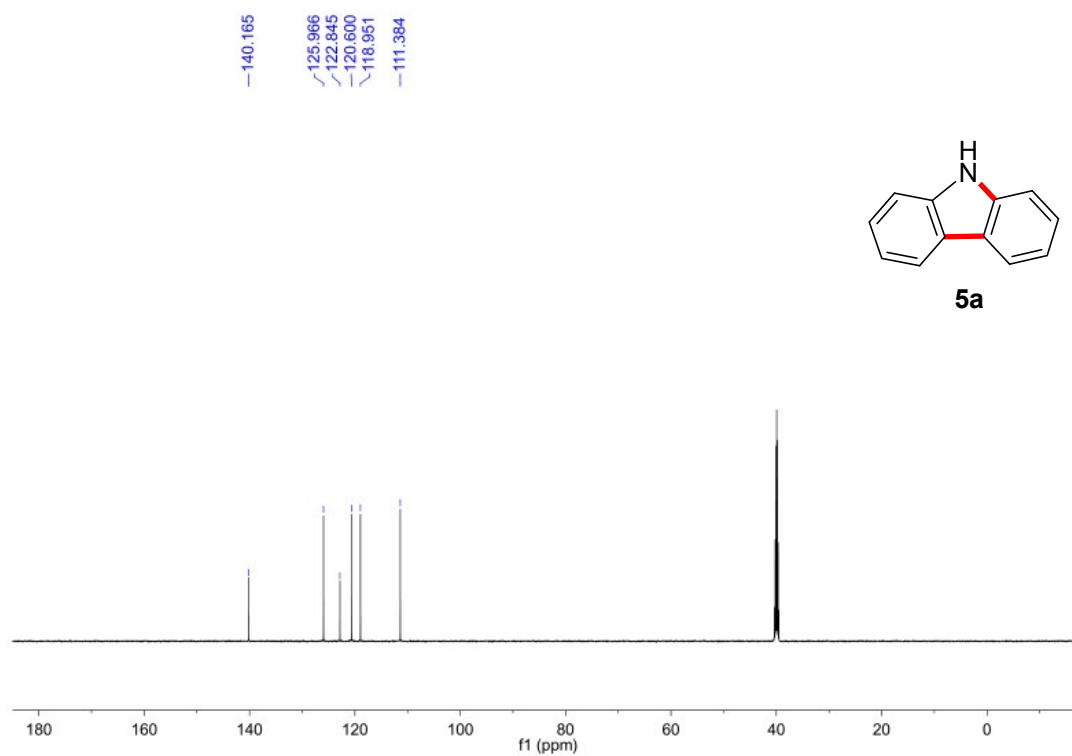



**5b**:  $^1\text{H}$  NMR (600 MHz) and  $^{13}\text{C}$  NMR (150 MHz),  $\text{DMSO-}d_6$

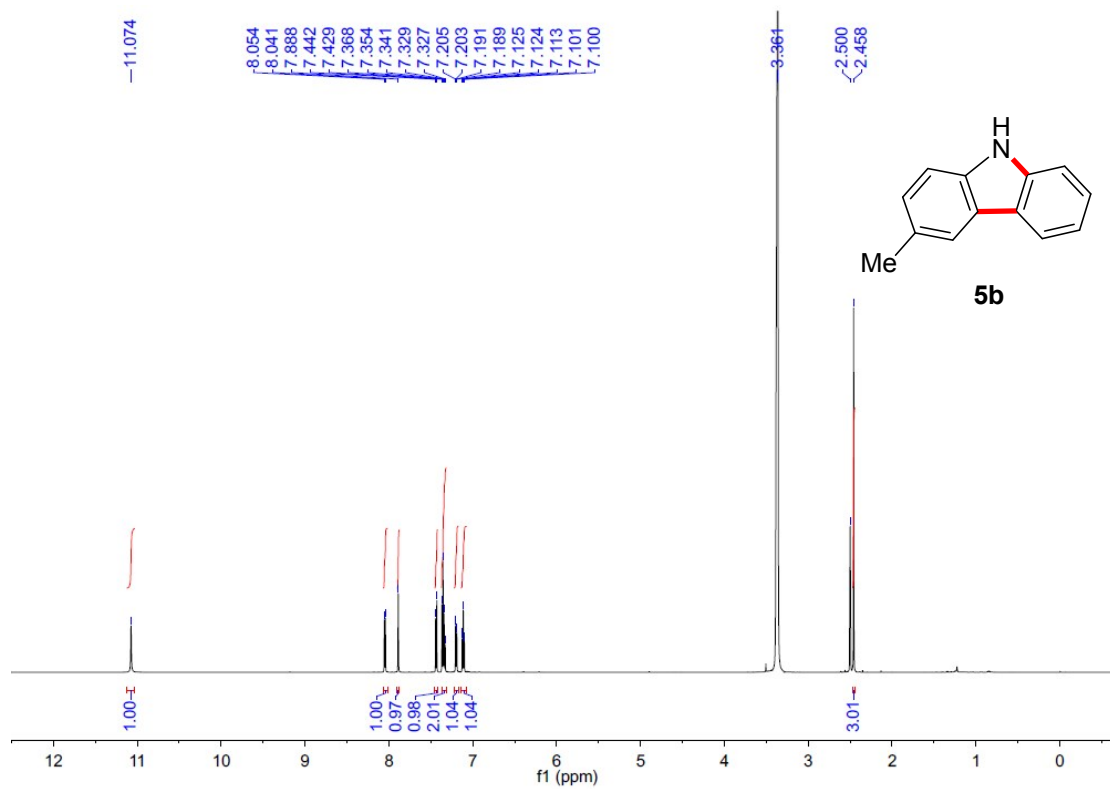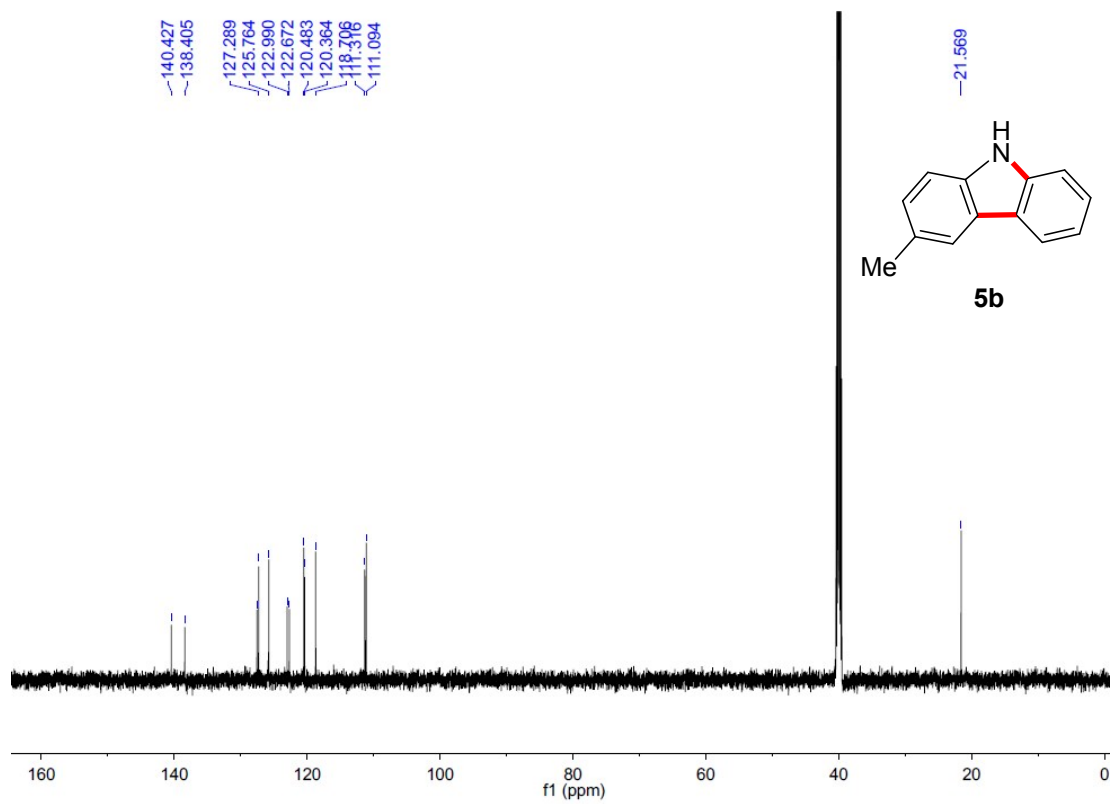

5c:  $^1\text{H}$  NMR (600 MHz) and  $^{13}\text{C}$  NMR (150 MHz),  $\text{CDCl}_3$

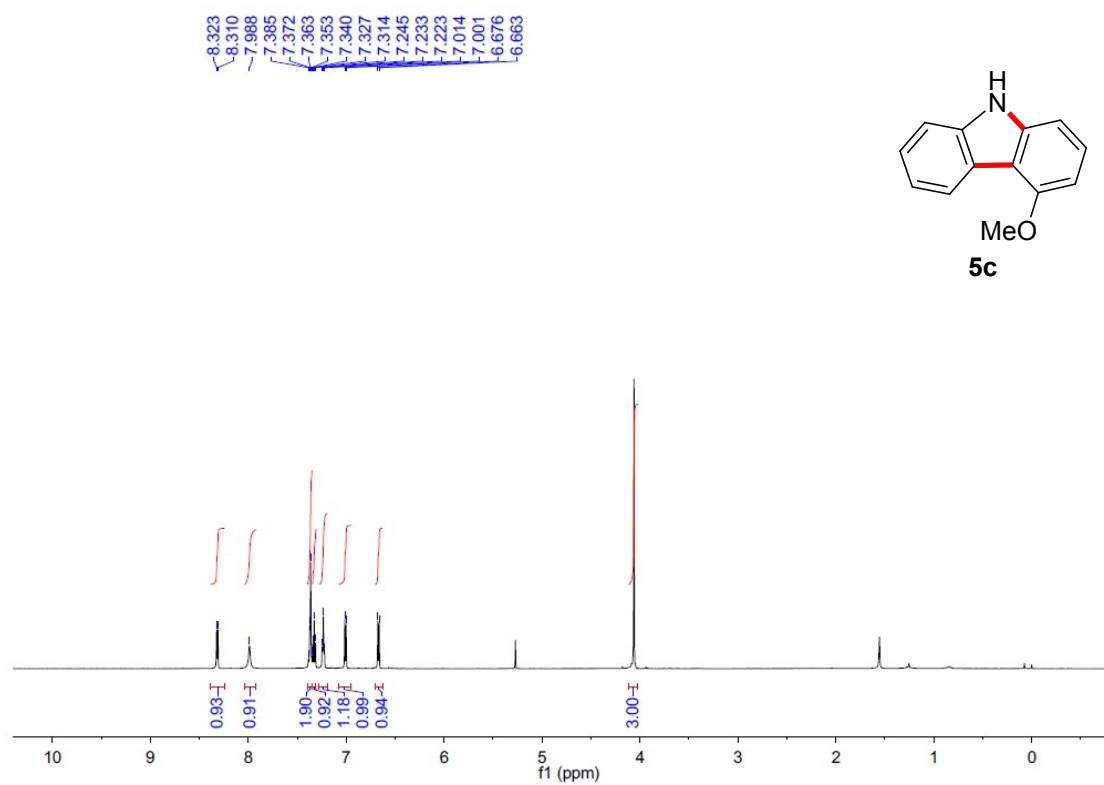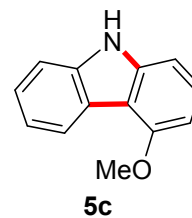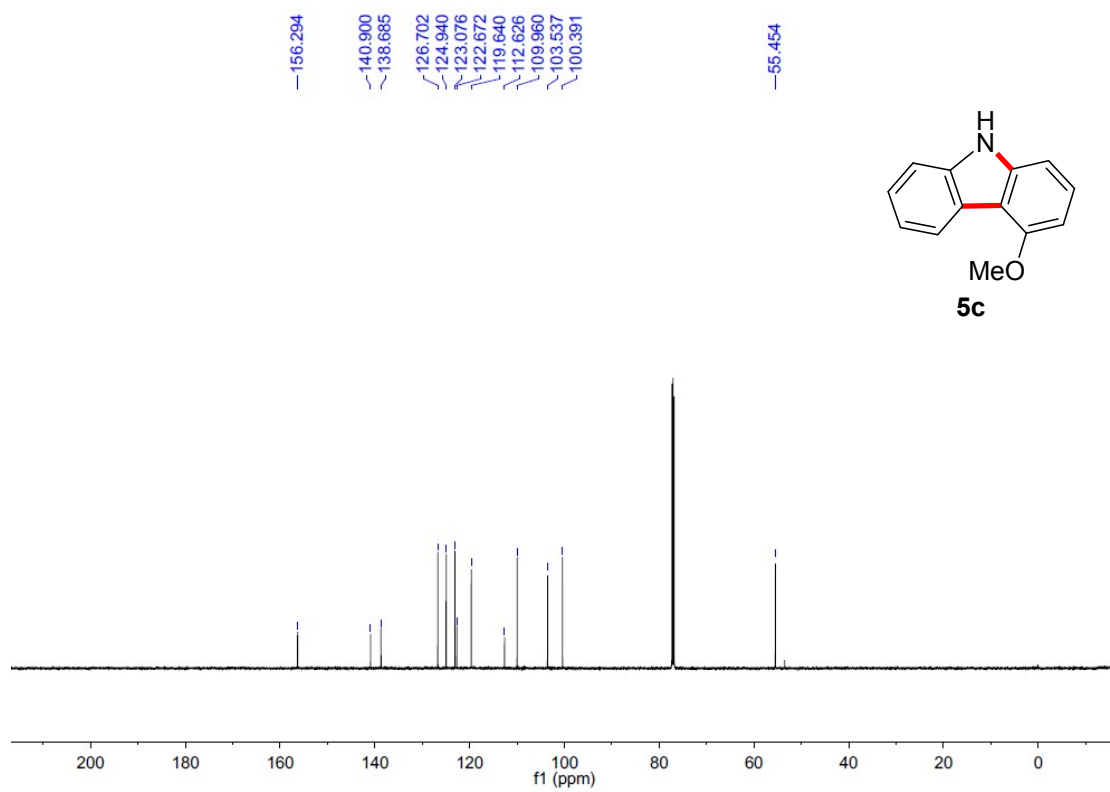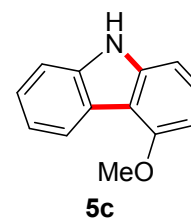

5d:  $^1\text{H}$  NMR (600 MHz) and  $^{13}\text{C}$  NMR (150 MHz),  $\text{DMSO-}d_6$

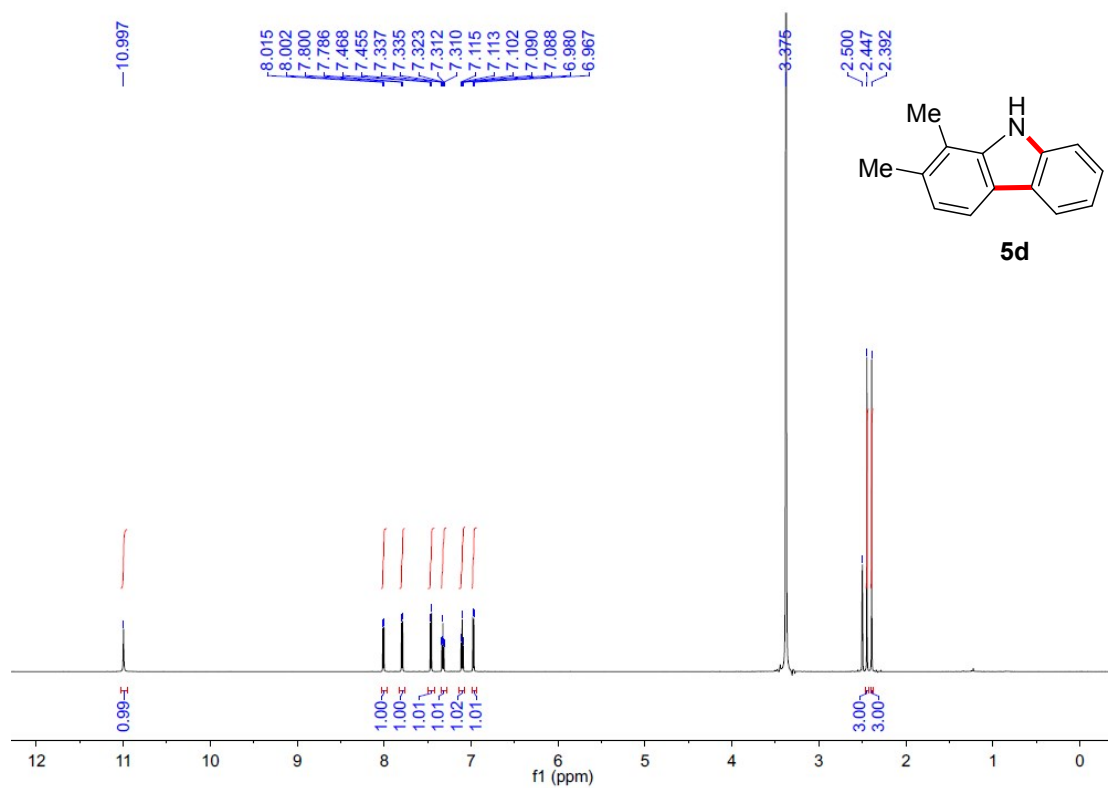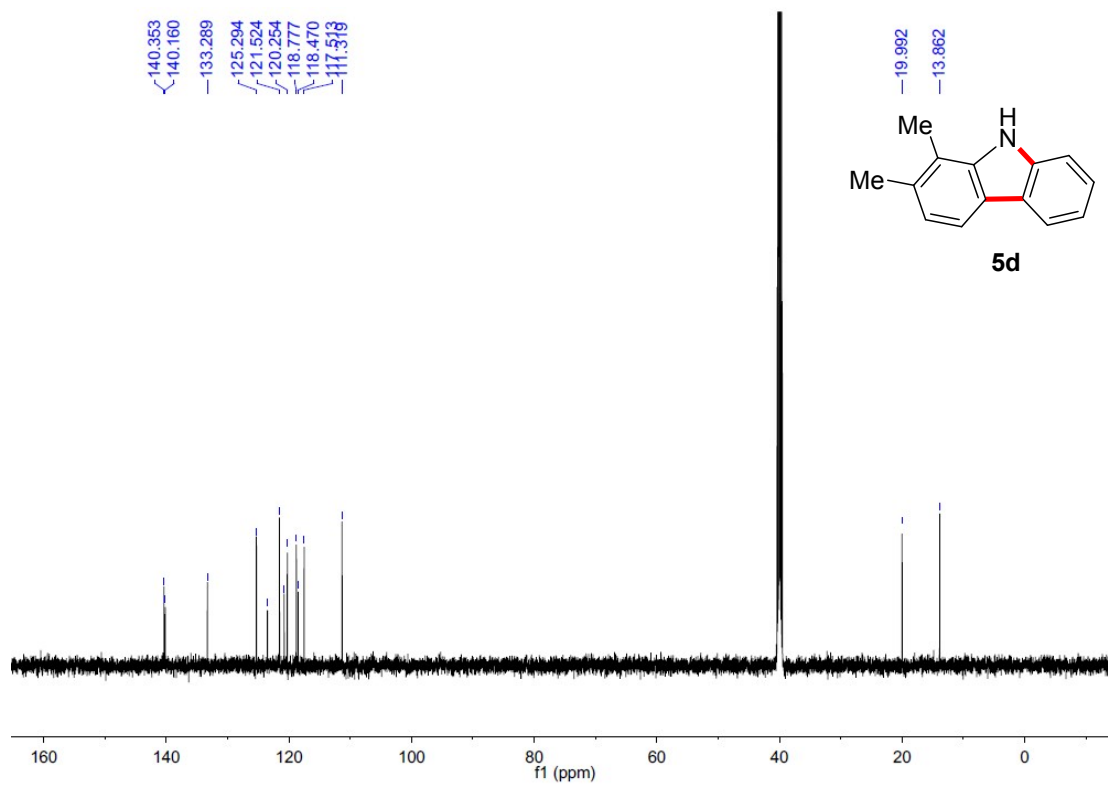

6:  $^1\text{H}$  NMR (600 MHz) and  $^{13}\text{C}$  NMR (150 MHz),  $\text{CDCl}_3$

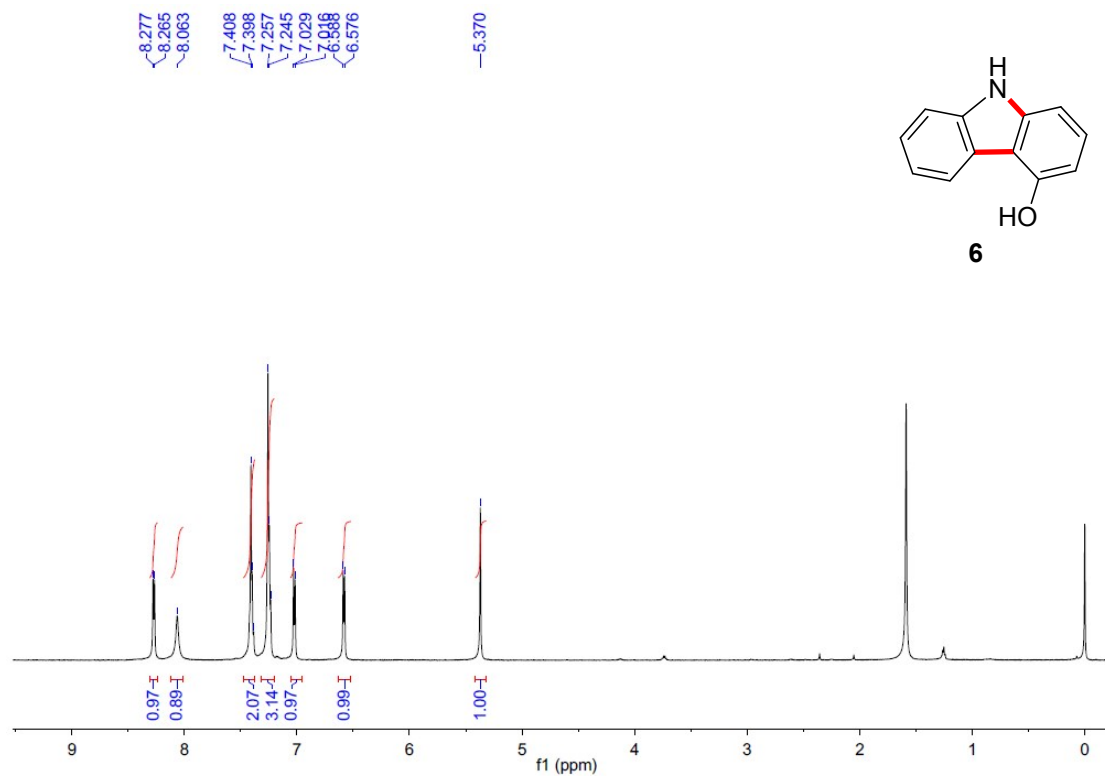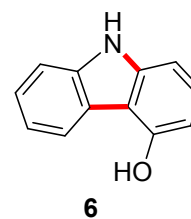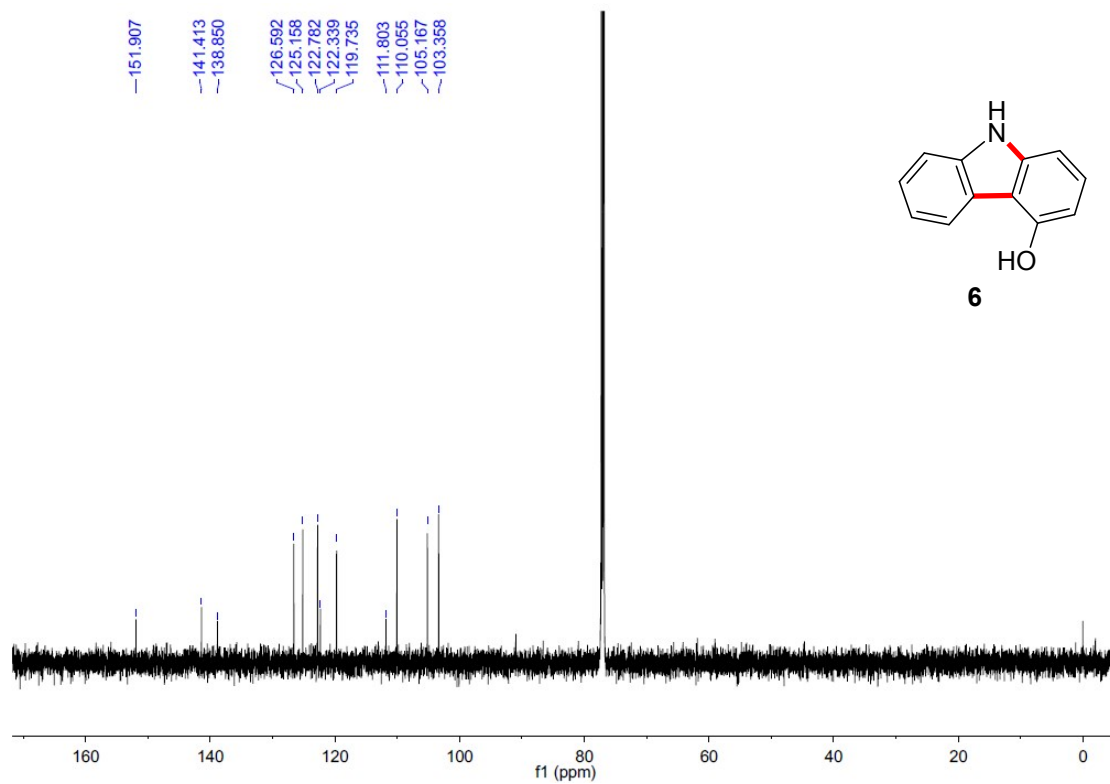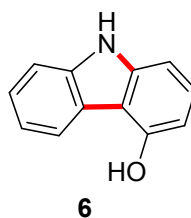

## 9. Crystallographic data for 3s (CCDC: 2059983)

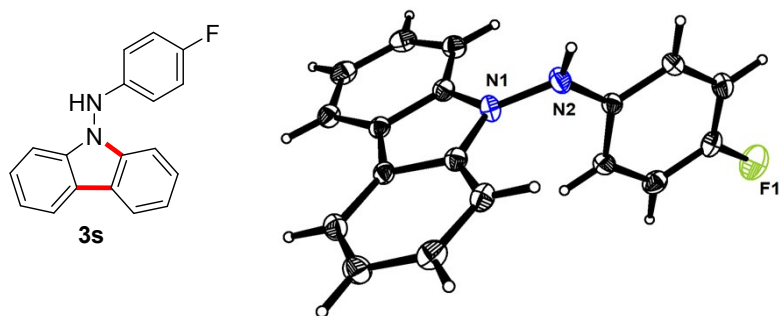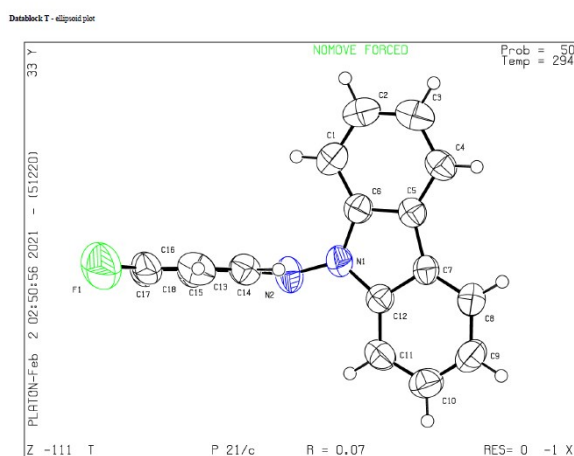

An ellipsoid plot (50% probability) view of the title compound.

The single crystal of **3s** was cultivated from the mixed solvents of ethyl acetate and petroleum ether with a volume ratio of 1:10 via solvent volatilization under air. Single-crystal X-ray diffraction data was collected at room Temperature on a SMART APEXII CCD X diffractometer.

## checkCIF/PLATON report

Structure factors have been supplied for datablock(s) T

THIS REPORT IS FOR GUIDANCE ONLY. IF USED AS PART OF A REVIEW PROCEDURE FOR PUBLICATION, IT SHOULD NOT REPLACE THE EXPERTISE OF AN EXPERIENCED CRYSTALLOGRAPHIC REFEREE.

No syntax errors found.    CIF dictionary    Interpreting this report

### Datablock: T

---

|                 |                |                    |              |
|-----------------|----------------|--------------------|--------------|
| Bond precision: | C-C = 0.0044 A | Wavelength=0.71073 |              |
| Cell:           | a=11.661 (2)   | b=11.744 (2)       | c=10.481 (2) |
|                 | alpha=90       | beta=102.40 (3)    | gamma=90     |
| Temperature:    | 294 K          |                    |              |
|                 | Calculated     | Reported           |              |
| Volume          | 1401.9 (5)     | 1401.9 (5)         |              |
| Space group     | P 21/c         | P 21/c             |              |
| Hall group      | -P 2ybc        | -P 2ybc            |              |
| Moiety formula  | C18 H13 F N2   | C18 H13 F N2       |              |
| Sum formula     | C18 H13 F N2   | C18 H13 F N2       |              |
| Mr              | 276.30         | 276.30             |              |
| Dx, g cm-3      | 1.309          | 1.309              |              |
| Z               | 4              | 4                  |              |
| Mu (mm-1)       | 0.087          | 0.087              |              |
| F000            | 576.0          | 576.0              |              |
| F000'           | 576.25         |                    |              |
| h, k, lmax      | 13, 13, 12     | 13, 13, 12         |              |
| Nref            | 2482           | 2477               |              |
| Tmin, Tmax      | 0.991, 0.994   | 0.989, 0.999       |              |
| Tmin'           | 0.990          |                    |              |

Correction method= # Reported T Limits: Tmin=0.989 Tmax=0.999  
AbsCorr = MULTI-SCAN

Data completeness= 0.998                      Theta(max)= 25.048

R(reflections)= 0.0669( 1702)                  wr2(reflections)= 0.2282( 2477)

S = 1.053                                          Npar= 191

---

The following ALERTS were generated. Each ALERT has the format  
**test-name\_ALERT\_alert-type\_alert-level**.  
Click on the hyperlinks for more details of the test.

## 10. DFT calculations

**Computational methods:** All the calculations were performed with the GAUSSIAN 16 programs.<sup>1</sup> The geometrical optimizations of the reactants, intermediates, transition states (TSs) and products were performed with the density functional exchange correlation (B3LYP) method,<sup>2,3</sup> including the empirical dispersion corrections developed by Grimme et al.<sup>4,5</sup>, and the augmented correlation consistent basis set 6-311+G(d) for all nonmetal atoms.<sup>6</sup> Vibrational frequency calculations at the same level were performed to confirm stationary points as minima (zero imaginary frequency) or transition states (one imaginary frequency). In several cases where the TSs could not be easily confirmed by the animation of their vibrations, intrinsic reaction coordinate (IRC)<sup>7,8</sup> calculations were performed to establish the connection of each TS to its corresponding reactant and product. The relative energies of all optimized structures were refined by performing single-point energy calculations with the PCM solvation model<sup>9,10</sup> using acetonitrile as solvent.

Mechanistic studies are examined thoroughly with DFT calculation, the profile of the reaction pathway is depicted in Figure S2. Firstly, interaction of 2-(trimethylsilyl)phenyl triflates **2a** with CsF in situ generates the benzyne. Then azobenzene **1a** approaches to benzene by nucleophilic attacking via transition state  $\text{TS}_{\text{C-N}}$  with energy barrier of 19.1 kcal/mol, producing intermediate **I<sup>1</sup>**. Further, a sunlight irradiation results into the formation of intermediate **II<sup>3</sup>** with the C1–C2 distance of 3.04 Å, herein, involving two steps: (1) intersystem crossing (ISC) between **I<sup>1</sup>** and **I<sup>3</sup>**, and (2) the transformation from **I<sup>3</sup>** to **II<sup>3</sup>** through a rotation of benzene group. Next, a stable five-membered heterocycle carbazole is quickly obtained through the formation of C1–C2 bond via transition state  $\text{TS}_{\text{C-C}}$  with low energy barrier of only 9.0 kcal/mol. Finally, the H1 transfer from C to N is required for obtaining target product. However, we found that it is very difficult for a direct H1 transfer from C to N. As shown the direct H1 transfer transition state  $\text{TS}'_{\text{N-H}}$  (without H<sub>2</sub>O) in Figure S3, its energy barrier is up to 61.2 kcal/mol due to high deformation cost. Here, an alternative stratagem is proposed to perform the H1 transfer from C to N with H<sub>2</sub>O. We found that, with the assistance of one H<sub>2</sub>O molecule, the energy barrier of the H1 transfer from C to N is observably decreased to be 20.1 kcal/mol.

- (1) Frisch, M. J.; Trucks, G. W.; Schlegel, H. B.; Scuseria, G. E.; Robb, M. A.; Cheeseman, J. R.; Scalmani, G.; Barone, V.; Petersson, G. A.; Nakatsuji, H.; Li, X.; Caricato, M.; Marenich, A. V.; Bloino, J.; Janesko, B. G.; Gomperts, R.; Mennucci, B.; Hratchian, H. P.; Ortiz, J. V.; Izmaylov, A. F.; Sonnenberg, J. L.; Williams-Young, D.; Ding, F.; Lipparini, F.; Egidi, F.; Goings, J.; Peng, B.; Petrone, A.; Henderson, T.; Ranasinghe, D.; Zakrzewski, V. G.; Gao, J.; Rega, N.; Zheng, G.; Liang, W.; Hada, M.; Ehara, M.; Toyota, K.; Fukuda, R.; Hasegawa, J.; Ishida, M.; Nakajima, T.; Honda, Y.; Kitao, O.; Nakai, H.; Vreven, T.; Throssell, K.; Montgomery, J. A Jr.; Peralta, J. E.; Ogliaro, F.; Bearpark, M. J.; Heyd, J. J.; Brothers, E. N.; Kudin, K. N.; Staroverov, V. N.; Keith, T. A.; Kobayashi, R.; Normand, J.; Raghavachari, K.; Rendell, A. P.; Burant, J. C.; Iyengar, S. S.; Tomasi, J.; Cossi, M.; Millam, J. M.; Klene, M.; Adamo, C.; Cammi, R.; Ochterski, J. W.; Martin, R. L.; Morokuma, K.; Farkas, O.; Foresman, J. B.; Fox, D. J. *Gaussian 16; Gaussian, Inc.: Wallingford CT*, 2016.
- (2) Becke, A. D. *J. Chem. Phys.* **1993**, *98*, 5648–5652.
- (3) Lee, C.; Yang W.; Parr, R. G. *Phys. Rev. B* **1988**, *137*, 785–789.
- (4) Grimme, S.; Antony, J.; Ehrlich, S.; Krieg, H. *J. Chem. Phys.* **2010**, *132*, 154104–154119.
- (5) Singla, P.; Riyaz, M.; Singhal, S.; Goel, N. *Phys. Chem. Chem. Phys.* **2016**, *18*, 5597–5604.
- (6) Hehre, W. J.; Ditchfield, R.; Pople, J. A. *J. Chem. Phys.* **1972**, *56*, 2257–2261.
- (7) Fukui, K. *Acc. Chem. Res.* **1981**, *14*, 363–368.
- (8) Fukui, K. *J. Phys. Chem.* **1970**, *74*, 4161–4163.
- (9) Barone, V.; Cossi, M. *J. Phys. Chem. A* **1998**, *102*, 1995–2001.
- (10) Cossi, M.; Rega, N.; Scalmani, G.; Barone, V. *J. Comput. Chem.* **2003**, *24*, 669–681.

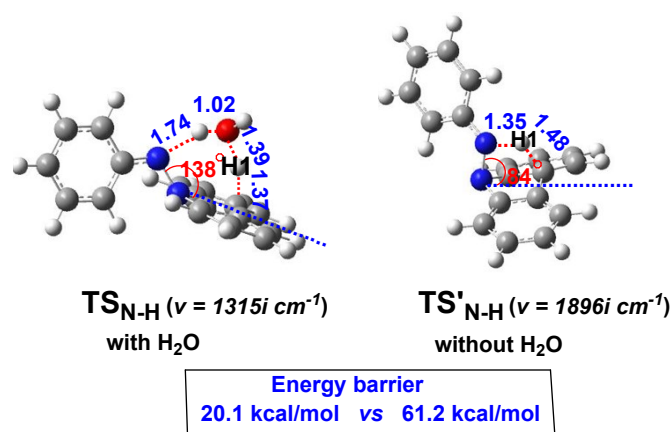

**Figure S2.** Comparison between two the transition states with H<sub>2</sub>O and without H<sub>2</sub>O

#### Atomic coordinates of key transition states and intermediates

TS<sub>C-N</sub> ( $\nu = 160i \text{ cm}^{-1}$ )

|   |                |                 |                 |
|---|----------------|-----------------|-----------------|
| C | 2.296548653095 | -2.358826594022 | -0.641669986485 |
| C | 1.563244054570 | -1.460768656169 | 0.150129419117  |



|   |                 |                 |                 |
|---|-----------------|-----------------|-----------------|
| C | 2.219076846214  | -0.660459238095 | 1.102225610510  |
| C | 3.601015197438  | -0.742083603792 | 1.222926569663  |
| C | 4.335006963124  | -1.603644936863 | 0.402370491795  |
| C | 3.681038800406  | -2.410919807256 | -0.530387927769 |
| H | 1.767713576523  | -2.991984796087 | -1.345115976053 |
| H | 1.645175551871  | -0.009462261688 | 1.747782402182  |
| H | 4.109957753185  | -0.137737131476 | 1.965956188374  |
| H | 5.413526763770  | -1.658271984000 | 0.504282057410  |
| H | 4.248162458473  | -3.089889042961 | -1.157413462541 |
| C | -3.904902646625 | -1.780334967881 | -0.623773006819 |
| C | -4.703563176301 | -0.827331662035 | 0.017239903607  |
| C | -4.109859301115 | 0.218739034363  | 0.721856809317  |
| C | -2.722176886462 | 0.322082159315  | 0.783587820899  |
| C | -1.927160318390 | -0.640903642860 | 0.151748478358  |
| C | -2.520499781837 | -1.696816149949 | -0.556282248003 |
| H | -4.366364086890 | -2.588904957352 | -1.180396782529 |
| H | -5.784311616838 | -0.900448657419 | -0.038958615512 |
| H | -4.725374373161 | 0.958964495757  | 1.220955186382  |
| H | -2.251126089765 | 1.132850366398  | 1.323876583345  |
| H | -1.895531463533 | -2.429939969934 | -1.049514089372 |
| N | 0.169445754311  | -1.505901793408 | -0.018500356896 |
| N | -0.512389889130 | -0.498644467621 | 0.274212787525  |
| C | 0.117053239964  | 1.461770617120  | 0.058018683826  |
| C | 0.155491045286  | 1.618136589369  | -1.309783491983 |
| C | 0.537447564521  | 2.920811398706  | -1.667998223663 |
| C | 0.817237099909  | 3.876746458965  | -0.680615366199 |
| C | 0.725568831653  | 3.556644517594  | 0.680795114150  |
| C | 0.345257725162  | 2.247954742570  | 1.059524847595  |
| H | -0.070132498073 | 0.859438242294  | -2.049694116452 |
| H | 0.612609235389  | 3.178762461124  | -2.719767466627 |
| H | 1.109018937408  | 4.879619669032  | -0.981450480282 |
| H | 0.949177075847  | 4.324091568262  | 1.419793643128  |

## P

|   |               |               |               |
|---|---------------|---------------|---------------|
| C | -2.2816017857 | -2.473859155  | -0.6885702851 |
| C | -1.6672235806 | -1.3241181829 | -0.1513835491 |
| C | -2.4628196514 | -0.3399604665 | 0.4751907347  |
| C | -3.8354926423 | -0.517754778  | 0.5406445814  |
| C | -4.4421925699 | -1.637291178  | -0.0420076986 |
| C | -3.6624892288 | -2.6139526271 | -0.6610209212 |
| H | -1.6515414336 | -3.2379765736 | -1.1283577325 |
| H | -2.0150373742 | 0.5345227686  | 0.9218977312  |
| H | -4.4445799227 | 0.2272366681  | 1.0402448426  |
| H | -5.520073932  | -1.7494714118 | 0.000533026   |

|   |               |               |               |
|---|---------------|---------------|---------------|
| H | -4.1265953545 | -3.4902935915 | -1.0986757773 |
| C | 3.5929721907  | -2.2649407329 | 0.8707124715  |
| C | 4.5786877411  | -1.4338566528 | 0.3342153345  |
| C | 4.2184507732  | -0.2601429685 | -0.3285866601 |
| C | 2.8784907334  | 0.092674013   | -0.4561651832 |
| C | 1.9004969862  | -0.7526588335 | 0.0753947066  |
| C | 2.2499345165  | -1.9311270552 | 0.7423028746  |
| H | 3.8706379896  | -3.1700946517 | 1.3989125478  |
| H | 5.6253202635  | -1.6981156956 | 0.4378715244  |
| H | 4.9812057579  | 0.3833317828  | -0.7520728676 |
| H | 2.5936185592  | 0.9950245549  | -0.9802390285 |
| H | 1.4779987583  | -2.5602578614 | 1.166274658   |
| N | -0.2766056558 | -1.3927575862 | -0.2009010222 |
| N | 0.5064079307  | -0.410295652  | -0.0691515291 |
| C | 0.1472629899  | 1.0248065842  | -0.1449286843 |
| C | 0.5108955497  | 1.8011176725  | 0.9652323341  |
| C | 0.1955234116  | 3.1539848141  | 0.9316795599  |
| C | -0.4220729389 | 3.6748561059  | -0.2126719472 |
| C | -0.7182516913 | 2.8438246731  | -1.2983357671 |
| C | -0.4683560316 | 1.4496070589  | -1.3231917185 |
| H | 1.0053467591  | 1.3680463627  | 1.8302199565  |
| H | 0.4338710026  | 3.7927701711  | 1.7757258317  |
| H | -0.6640589417 | 4.7348354661  | -0.2524895072 |
| H | -1.176251078  | 3.3162318582  | -2.1690411957 |

## **F**

|   |               |               |               |
|---|---------------|---------------|---------------|
| C | -2.5721070624 | -1.839563913  | -1.0137451492 |
| C | -1.6797686331 | -1.1036950865 | -0.2011330346 |
| C | -2.2103860246 | -0.3926119552 | 0.9013564774  |
| C | -3.5764205546 | -0.4119407909 | 1.1564747491  |
| C | -4.4512167481 | -1.1202735874 | 0.3278456469  |
| C | -3.9365964715 | -1.8360274503 | -0.7576916315 |
| H | -2.1668521565 | -2.4035025746 | -1.8471842037 |
| H | -1.549371882  | 0.145801735   | 1.5690593671  |
| H | -3.9628393051 | 0.1276530428  | 2.015486289   |
| H | -5.5164877269 | -1.123554005  | 0.5320436696  |
| H | -4.6034592033 | -2.3989242981 | -1.4029315207 |
| C | 3.4641973698  | -2.3756298953 | 0.7334162806  |
| C | 4.5190622679  | -1.5850944764 | 0.2748888427  |
| C | 4.2452865143  | -0.3486557588 | -0.311329818  |
| C | 2.9331353716  | 0.0991191127  | -0.4409956623 |
| C | 1.8775960637  | -0.6926477851 | 0.028846865   |
| C | 2.1491478293  | -1.9349979465 | 0.6158948564  |

|   |               |               |               |
|---|---------------|---------------|---------------|
| H | 3.6643998625  | -3.3373394643 | 1.194054953   |
| H | 5.5431403461  | -1.9290016536 | 0.3721263054  |
| H | 5.0558063869  | 0.2690713793  | -0.6835145548 |
| H | 2.7328871316  | 1.0515177628  | -0.9160149707 |
| H | 1.3285673057  | -2.5413155203 | 0.978344457   |
| N | -0.3336794317 | -1.2477730529 | -0.4980136584 |
| N | 0.5198123443  | -0.2779510557 | -0.1037841143 |
| C | 0.189992681   | 1.1091863964  | -0.145631677  |
| C | 0.7392626149  | 2.0271047102  | 0.7683820508  |
| C | 0.3917985386  | 3.3743160811  | 0.7011378277  |
| C | -0.5133326802 | 3.8396698833  | -0.2557758771 |
| C | -1.0852568069 | 2.9367477158  | -1.1664565148 |
| C | -0.6977698992 | 1.6250725136  | -1.0705327615 |
| H | 1.4285807047  | 1.6776717252  | 1.5296772685  |
| H | 0.8256172445  | 4.0669871811  | 1.414064321   |
| H | -0.7805582392 | 4.8904169847  | -0.2967037996 |
| H | -1.7948587522 | 3.2737520459  | -1.915445279  |

### **H<sup>3</sup>**

|   |               |               |               |
|---|---------------|---------------|---------------|
| C | -2.4842332807 | -2.0891654147 | 0.8415862338  |
| C | -1.6386218579 | -1.2382901942 | 0.0927957042  |
| C | -2.2118814471 | -0.482332855  | -0.9563632134 |
| C | -3.5738628567 | -0.5715867817 | -1.2220117217 |
| C | -4.4027632476 | -1.3956973614 | -0.4564795971 |
| C | -3.8449440305 | -2.156012636  | 0.5764889496  |
| H | -2.0450169954 | -2.685181824  | 1.6345464717  |
| H | -1.5882297746 | 0.1457294945  | -1.5788948216 |
| H | -3.9923470016 | 0.0052436031  | -2.0408968466 |
| H | -5.4649572993 | -1.4529799541 | -0.6685472021 |
| H | -4.4748889742 | -2.8083384175 | 1.1727885247  |
| C | 0.1034280635  | 3.3285404728  | -0.785164928  |
| C | -0.5968048316 | 3.7835702007  | 0.3326254834  |
| C | -0.9332407584 | 2.8898468803  | 1.3503080591  |
| C | -0.5716180249 | 1.5479507881  | 1.2567602632  |
| C | 0.1247671022  | 1.0981571621  | 0.1330716958  |
| C | 0.4623498947  | 1.9864659367  | -0.890987594  |
| H | 0.3626501944  | 4.0155602311  | -1.5835391028 |
| H | -0.8790720225 | 4.8279863927  | 0.4101865476  |
| H | -1.4707883364 | 3.2382257178  | 2.2257664482  |
| H | -0.8211898212 | 0.8536468103  | 2.0504644247  |
| H | 0.9857199882  | 1.6267170667  | -1.7693405082 |
| N | -0.2917963868 | -1.3088926457 | 0.4075656815  |
| N | 0.5120654235  | -0.2888325304 | 0.042398444   |

|   |              |               |               |
|---|--------------|---------------|---------------|
| C | 1.8863527242 | -0.5906545525 | -0.0486954479 |
| C | 2.3472929224 | -1.9070149595 | -0.2544978183 |
| C | 3.714404362  | -2.1619339509 | -0.3298683947 |
| C | 4.6552249008 | -1.1347006712 | -0.2183898176 |
| C | 4.2153790211 | 0.1851475129  | -0.0233353372 |
| C | 2.8625420524 | 0.3877381373  | 0.0592191087  |
| H | 1.6254265362 | -2.7080342105 | -0.3533830049 |
| H | 4.0499242725 | -3.1813647352 | -0.4883851466 |
| H | 5.7170405268 | -1.3474531008 | -0.2849573473 |
| H | 4.9243599626 | 1.0023413885  | 0.0662858098  |

**TS<sub>C-C</sub> ( $\nu = 384i \text{ cm}^{-1}$ )**

|   |                 |                 |                 |
|---|-----------------|-----------------|-----------------|
| C | 3.061992236744  | -1.524021020325 | 0.831729536053  |
| C | 2.036983993380  | -0.904376189805 | 0.077775193992  |
| C | 2.411033432760  | -0.054385424482 | -0.990598526294 |
| C | 3.754138251508  | 0.176781271848  | -1.264363501501 |
| C | 4.755965223790  | -0.417265324103 | -0.492031025674 |
| C | 4.397930500586  | -1.272841296025 | 0.556034252218  |
| H | 2.778045441065  | -2.192016976375 | 1.637955561979  |
| H | 1.652226824975  | 0.391093454959  | -1.621746496887 |
| H | 4.022936504102  | 0.820361498067  | -2.096102882615 |
| H | 5.801030612336  | -0.227950122879 | -0.712225641451 |
| H | 5.167311424990  | -1.749186140326 | 1.155136173949  |
| C | 0.019453192701  | 3.051904550989  | 1.187543353434  |
| C | -0.965539636350 | 3.648139111485  | 0.391656056135  |
| C | -1.596411443336 | 2.918476330185  | -0.607355898130 |
| C | -1.282863140589 | 1.549696861635  | -0.804564101688 |
| C | -0.282291978747 | 0.967302025299  | 0.028464990131  |
| C | 0.345739119896  | 1.698363993143  | 1.020373116852  |
| H | 0.521017527026  | 3.628981462973  | 1.956487557890  |
| H | -1.214643203488 | 4.694091972476  | 0.536386551988  |
| H | -2.314731369244 | 3.395366099458  | -1.265089959634 |
| H | -1.463768328582 | 1.123571802661  | -1.786035262834 |
| H | 1.057584524029  | 1.221637159298  | 1.683468555558  |
| N | 0.745017985531  | -1.259689255276 | 0.411800699928  |
| N | -0.249915979002 | -0.469883411616 | -0.024568778577 |
| C | -1.567906829218 | -0.990984607809 | -0.018819898012 |
| C | -1.900131128999 | -2.337826278590 | 0.166252284613  |
| C | -3.248993882241 | -2.698573790489 | 0.137094031721  |
| C | -4.252304117159 | -1.750160330746 | -0.079070486520 |
| C | -3.913321123941 | -0.399052188473 | -0.273237354730 |
| C | -2.581225060096 | -0.062438928197 | -0.224996503431 |
| H | -1.124568821176 | -3.075681614865 | 0.330767732877  |

|   |                 |                 |                 |
|---|-----------------|-----------------|-----------------|
| H | -3.518899081330 | -3.739463552279 | 0.282101797980  |
| H | -5.293966398790 | -2.054275872828 | -0.103568735725 |
| H | -4.685684273131 | 0.343535731011  | -0.450504393595 |

### III

|   |               |               |               |
|---|---------------|---------------|---------------|
| C | -3.5174198276 | -0.0361537315 | 0.7587779375  |
| C | -2.2030172328 | -0.0938110743 | 0.2306591589  |
| C | -1.9809305539 | 0.5309258863  | -1.0209619385 |
| C | -3.0119358977 | 1.1950728517  | -1.6824095388 |
| C | -4.2969237207 | 1.2558411802  | -1.1407890116 |
| C | -4.5359418292 | 0.624637897   | 0.0864770668  |
| H | -3.71219474   | -0.5216008614 | 1.7104249519  |
| H | -1.0012039791 | 0.4814142175  | -1.483777456  |
| H | -2.8065596512 | 1.6632481767  | -2.6412178234 |
| H | -5.0949165185 | 1.7731040041  | -1.6627994866 |
| H | -5.5297875602 | 0.6518379896  | 0.5244888115  |
| C | 1.5467436816  | -3.6854873391 | -0.6142745051 |
| C | 2.8357148007  | -3.1111537009 | -0.959258967  |
| C | 3.1930936694  | -1.8756878145 | -0.5550035619 |
| C | 2.2952023538  | -1.1289683632 | 0.3863073092  |
| C | 0.8810288767  | -1.619673876  | 0.3575774825  |
| C | 0.5751114941  | -2.9629977964 | 0.0163430422  |
| H | 1.3321492366  | -4.6983981289 | -0.9369084573 |
| H | 3.5127222904  | -3.7005460161 | -1.5683212697 |
| H | 4.1644243421  | -1.4572720249 | -0.7938670893 |
| H | 2.6886852129  | -1.3861183194 | 1.394655656   |
| H | -0.4240596557 | -3.3512230036 | 0.1661557685  |
| N | -1.273524746  | -0.8258026769 | 0.9447193023  |
| N | 0.0262163602  | -0.6277686054 | 0.6005026857  |
| C | 0.2686436229  | 1.8865411002  | 0.9490341774  |
| C | 0.7562272288  | 0.6187116913  | 0.6618669931  |
| C | 2.1129864097  | 0.3692262215  | 0.4409372146  |
| C | 3.0239401717  | 1.416130648   | 0.4641723013  |
| C | 2.5464198355  | 2.7091697166  | 0.6981564187  |
| C | 1.189543829   | 2.9358376307  | 0.9520190637  |
| H | -0.7784639819 | 2.0580003507  | 1.1585029217  |
| H | 4.0833253461  | 1.2401368239  | 0.3108308897  |
| H | 3.2382948866  | 3.544298027   | 0.6982318222  |
| H | 0.8436321459  | 3.9430583193  | 1.1569122301  |

### TS<sub>N-H</sub> ( $\nu = 1315i \text{ cm}^{-1}$ )

|   |                |                 |                 |
|---|----------------|-----------------|-----------------|
| C | 2.605933143934 | -0.221521361828 | -1.124245581833 |
| C | 2.219720376422 | -0.514629409772 | 0.208239091525  |
| C | 3.261869345412 | -0.794703000128 | 1.132964460654  |

|   |                 |                 |                 |
|---|-----------------|-----------------|-----------------|
| C | 4.594175078347  | -0.774596461784 | 0.745490734667  |
| C | 4.961658000228  | -0.477040816467 | -0.573717187700 |
| C | 3.948879346206  | -0.204245766961 | -1.495374105277 |
| H | 1.840545516311  | -0.016362244311 | -1.865127902365 |
| H | 2.994845199945  | -1.026210816693 | 2.160254628708  |
| H | 5.361264322270  | -0.993352027604 | 1.483723477600  |
| H | 6.004917046588  | -0.461407204995 | -0.870808465386 |
| H | 4.204743686229  | 0.024590874226  | -2.526770961178 |
| C | -2.464789384024 | -2.981845107435 | -0.394697305215 |
| C | -3.672186919805 | -2.223860134705 | -0.360643713345 |
| C | -3.644285390530 | -0.856870623468 | -0.271078603303 |
| C | -2.370301683161 | -0.204553908298 | -0.138374251268 |
| C | -1.168007420888 | -0.987139635716 | -0.331681814963 |
| C | -1.219248200326 | -2.389666088993 | -0.368602539789 |
| H | -2.532570085653 | -4.062773950700 | -0.455741911706 |
| H | -4.620975289764 | -2.745365722093 | -0.415211808782 |
| H | -4.560516396286 | -0.277108723815 | -0.259649688853 |
| H | -2.011177766536 | -0.306174329268 | 1.177675223171  |
| H | -0.308220897505 | -2.973238411271 | -0.415238156379 |
| N | 0.930927298367  | -0.571842288972 | 0.670849021085  |
| N | -0.074814771428 | -0.172709005140 | -0.252790964745 |
| C | -0.531227229117 | 1.173885511265  | -0.291294529049 |
| C | 0.225119153385  | 2.341826476497  | -0.272517796830 |
| C | -0.464274307210 | 3.552931825126  | -0.314314941958 |
| C | -1.866202668436 | 3.593175519249  | -0.354295756221 |
| C | -2.616069647781 | 2.417973335575  | -0.326703187958 |
| C | -1.938115681831 | 1.201140295769  | -0.291781040199 |
| H | 1.307124708493  | 2.310602881944  | -0.237246917456 |
| H | 0.095789232658  | 4.482026939330  | -0.319303325232 |
| H | -2.372164454771 | 4.551589672396  | -0.398172702317 |
| H | -3.700351889430 | 2.454883356212  | -0.330199090178 |
| O | -1.189565182534 | -0.384462083329 | 2.295555265376  |
| H | -0.225021925825 | -0.469667852815 | 1.967819440891  |
| H | -1.259796781956 | 0.387581208972  | 2.872859785805  |

**TS<sub>N-H</sub>** ( $\nu = 1896i \text{ cm}^{-1}$ )

|   |                |                |                 |
|---|----------------|----------------|-----------------|
| C | 2.683028522136 | 0.368357824154 | -0.966625582451 |
| C | 1.961626025330 | 0.453626591724 | 0.249466116558  |
| C | 2.671493421429 | 0.405151281077 | 1.477072857643  |
| C | 4.049250036790 | 0.265877915493 | 1.480866517231  |
| C | 4.755021783873 | 0.181615543628 | 0.274173900465  |
| C | 4.063156202354 | 0.238137979333 | -0.941753086450 |
| H | 2.146498910568 | 0.425506622591 | -1.904090008682 |
| H | 2.116666410008 | 0.477383061517 | 2.406220385914  |

|   |                 |                 |                 |
|---|-----------------|-----------------|-----------------|
| H | 4.582157233296  | 0.226194634552  | 2.424839994740  |
| H | 5.834515820130  | 0.078724141139  | 0.281346957534  |
| H | 4.610690389292  | 0.183359979991  | -1.876824187736 |
| C | -0.542180245130 | -3.279084096082 | -0.798936735786 |
| C | -1.399038727892 | -3.305032941844 | 0.348876263520  |
| C | -1.842970436851 | -2.169188450609 | 0.973340971222  |
| C | -1.408185667365 | -0.873170996779 | 0.463367585043  |
| C | -0.562945583548 | -0.902978381330 | -0.763469989077 |
| C | -0.109097305005 | -2.047347446444 | -1.346166411429 |
| H | -0.234182950490 | -4.211386403641 | -1.257014998209 |
| H | -1.711876156411 | -4.272909672524 | 0.730379044595  |
| H | -2.501190405779 | -2.230923314088 | 1.833830545797  |
| H | -0.234796475141 | -0.164131825281 | 1.020028977100  |
| H | 0.558046259880  | -2.018485468660 | -2.201386609257 |
| N | 0.606789556980  | 0.629948702441  | 0.326993396808  |
| N | -0.163618805947 | 0.483761029404  | -0.928246657270 |
| C | -1.388616364699 | 1.191910583518  | -0.553120990503 |
| C | -1.750318669412 | 2.481622271370  | -0.888780666403 |
| C | -2.937753331065 | 2.982008144940  | -0.339471705181 |
| C | -3.704243454792 | 2.201751298806  | 0.537685259035  |
| C | -3.320363308055 | 0.905621632498  | 0.888668554768  |
| C | -2.151723215858 | 0.385162258306  | 0.327159154357  |
| H | -1.140952565851 | 3.079726672879  | -1.557602405811 |
| H | -3.267907680490 | 3.982923470931  | -0.595186242384 |
| H | -4.620493041938 | 2.613659725193  | 0.948566420494  |
| H | -3.926699180348 | 0.318338631796  | 1.570393373806  |

## 11. HRMS analysis reports for new compounds

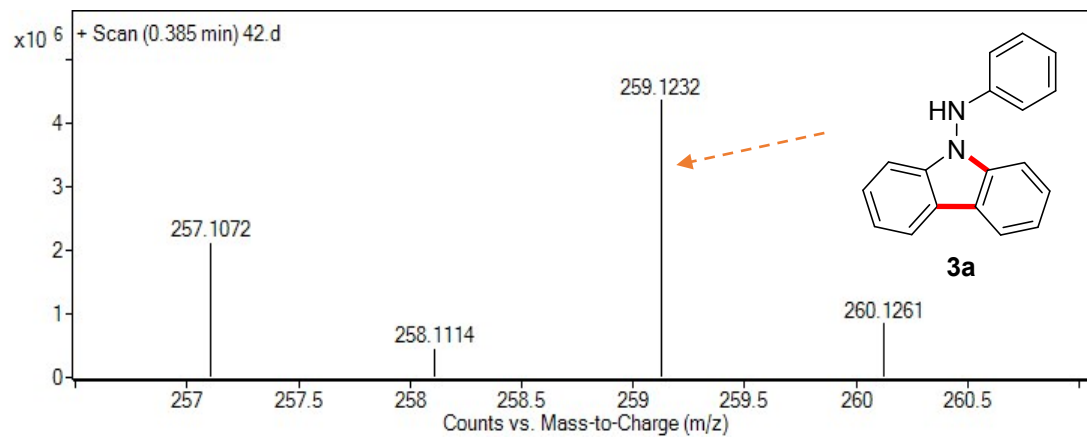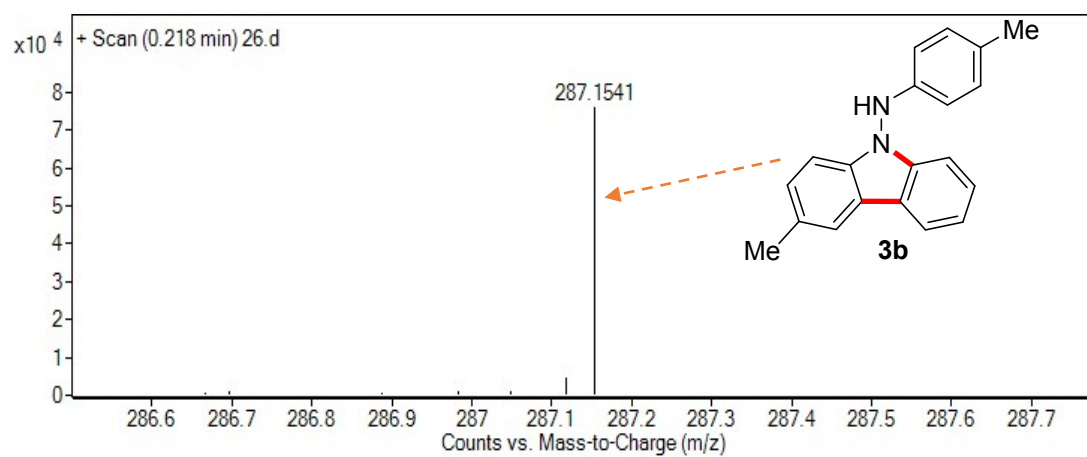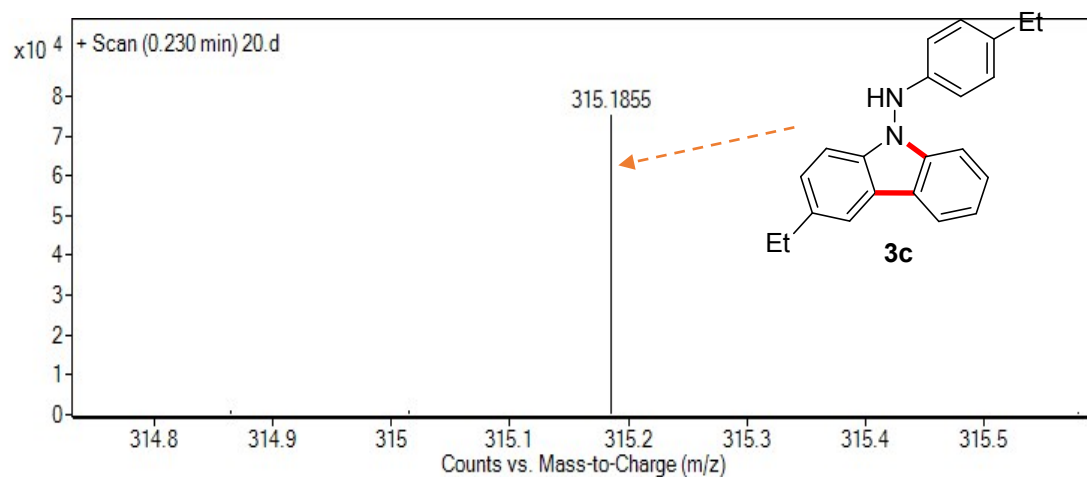



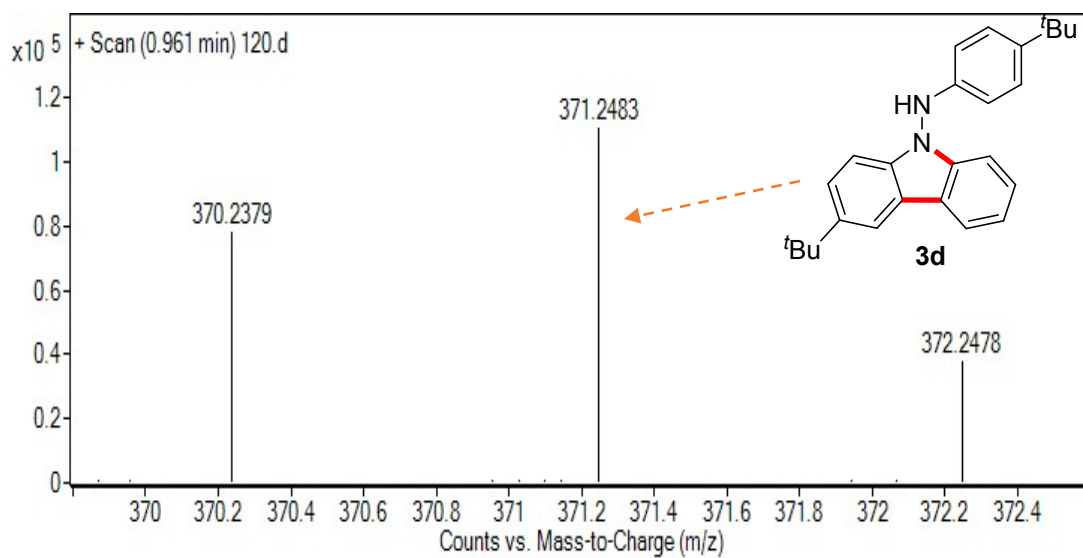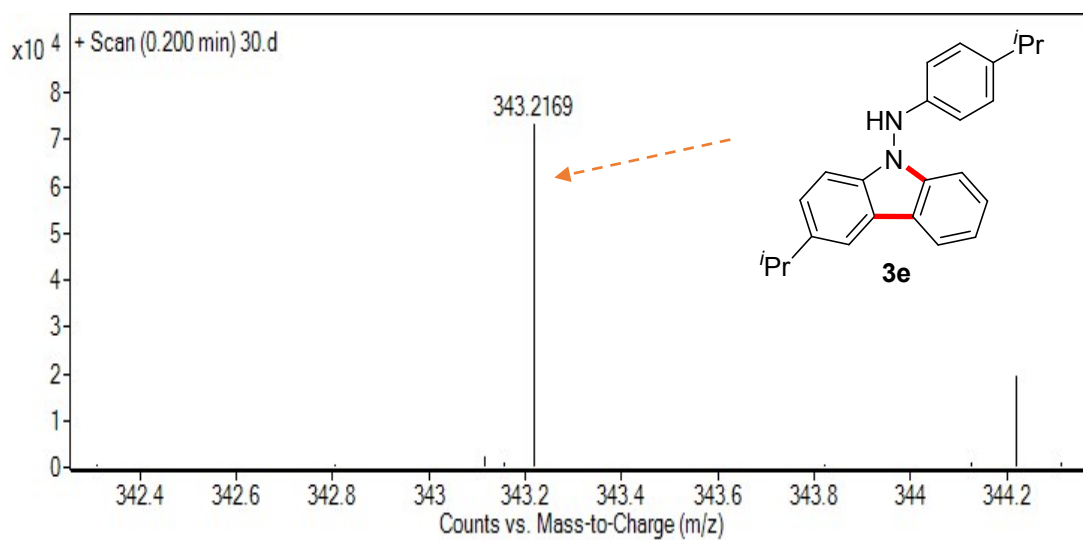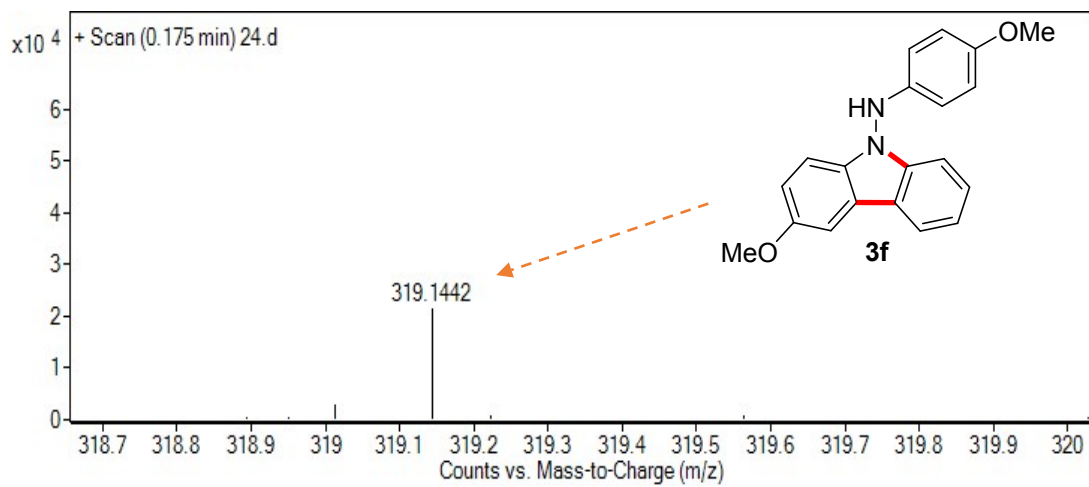

Operation Mode: ESI Positive Ion Mode

Elemental composition search on mass 414.94

m/z= 409.94-419.94

| m/z      | Theo. Mass | Delta (ppm) | RDB equiv. | Composition                                                                  |
|----------|------------|-------------|------------|------------------------------------------------------------------------------|
| 414.9439 | 414.9440   | -0.29       | 12.5       | C <sub>18</sub> H <sub>13</sub> N <sub>2</sub> Br <sub>2</sub>               |
|          | 414.9434   | 1.04        | 15.0       | C <sub>16</sub> H <sub>6</sub> O <sub>6</sub> N <sub>3</sub> Br              |
|          | 414.9448   | -2.20       | 14.5       | C <sub>18</sub> H <sub>8</sub> O <sub>7</sub> Br                             |
|          | 414.9421   | 4.27        | 15.5       | C <sub>14</sub> H <sub>4</sub> O <sub>5</sub> N <sub>6</sub> Br              |
|          | 414.9459   | -4.75       | -0.5       | C <sub>6</sub> H <sub>17</sub> O <sub>7</sub> N <sub>4</sub> Br <sub>2</sub> |

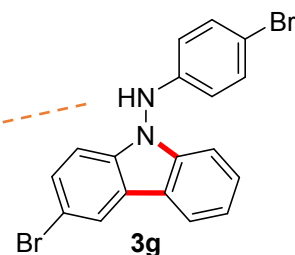

2\_20200624134315#10 RT: 0.08 AV: 1 NL: 6.89E6  
T: FTMS + p ESI Full ms [100.0000-1000.0000]

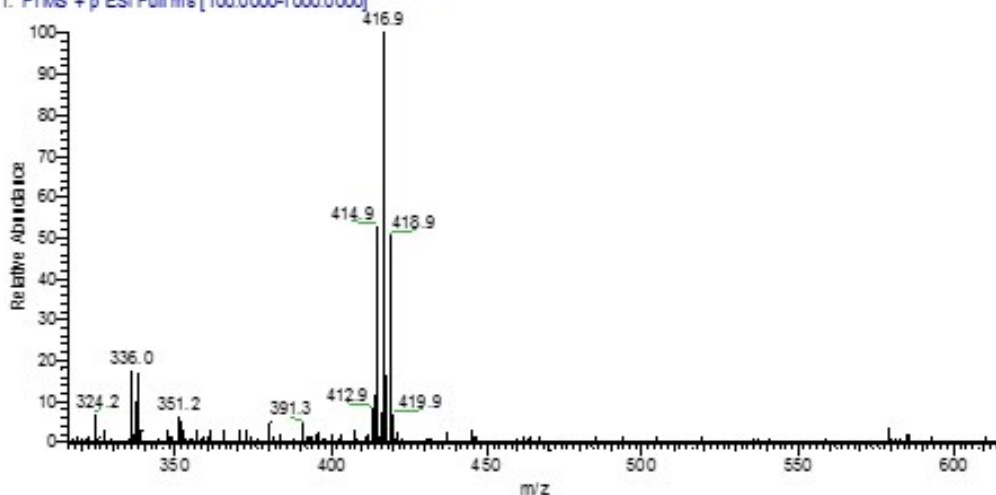

Operation Mode: ESI Positive Ion Mode

Elemental composition search on mass 327.0451

m/z= 322.0451-332.0451

| m/z      | Theo. Mass | Delta (ppm) | RDB equiv. | Composition                                                    |
|----------|------------|-------------|------------|----------------------------------------------------------------|
| 327.0451 | 327.0450   | 0.21        | 12.5       | C <sub>18</sub> H <sub>13</sub> N <sub>2</sub> Cl <sub>2</sub> |
|          | 327.0445   | 1.70        | 17.0       | C <sub>21</sub> H <sub>10</sub> ONCl                           |
|          | 327.0441   | 3.19        | 21.5       | C <sub>24</sub> H <sub>7</sub> O <sub>2</sub>                  |

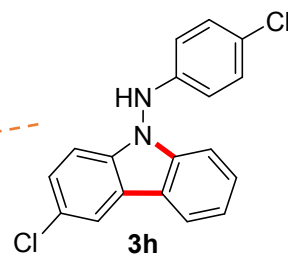

lhj\_20210428170632 #19 RT: 0.16 AV: 1 NL: 4.78E7  
T: FTMS + p ESI Full ms [100.0000-1000.0000]

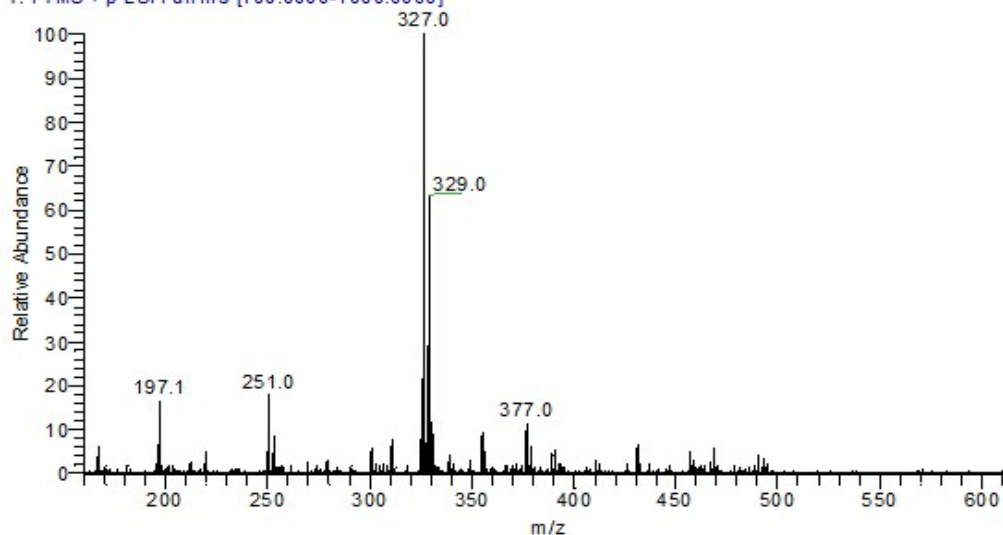

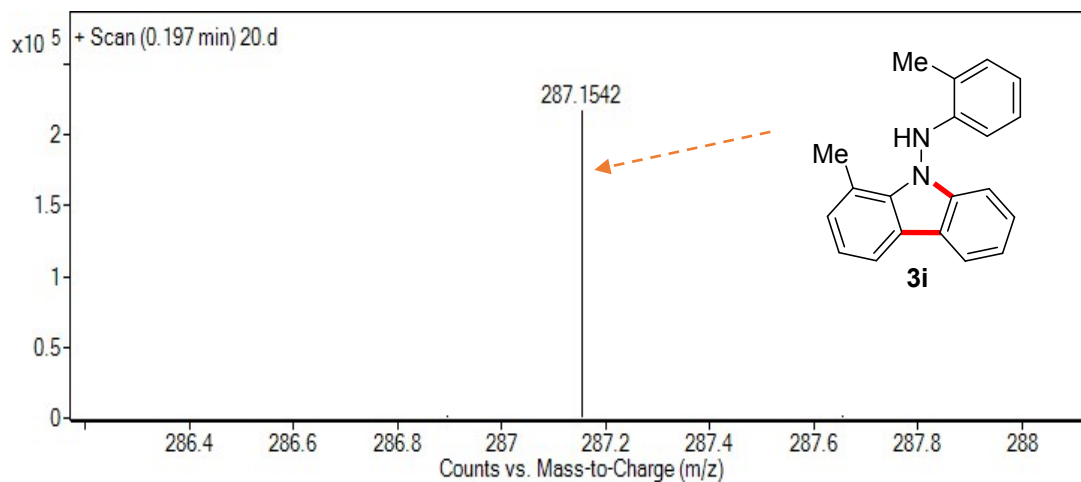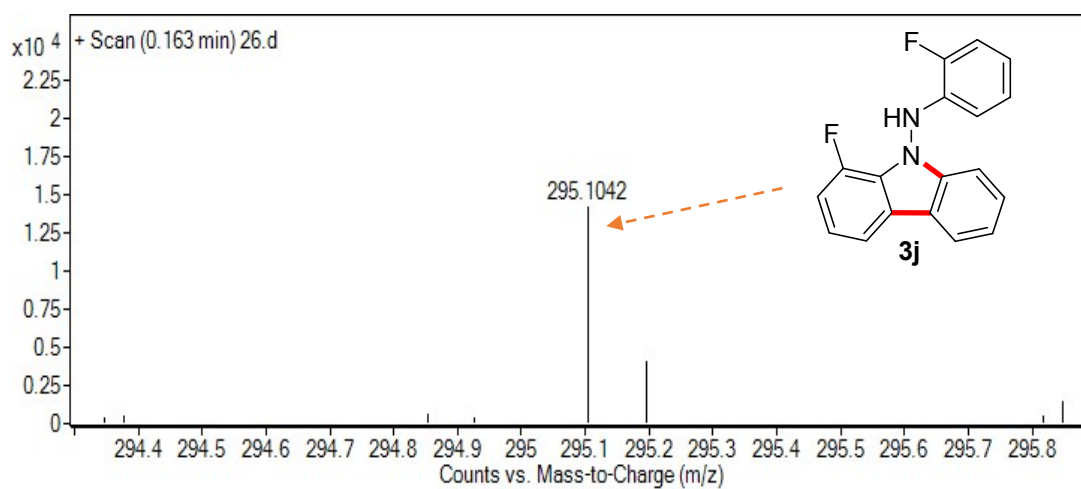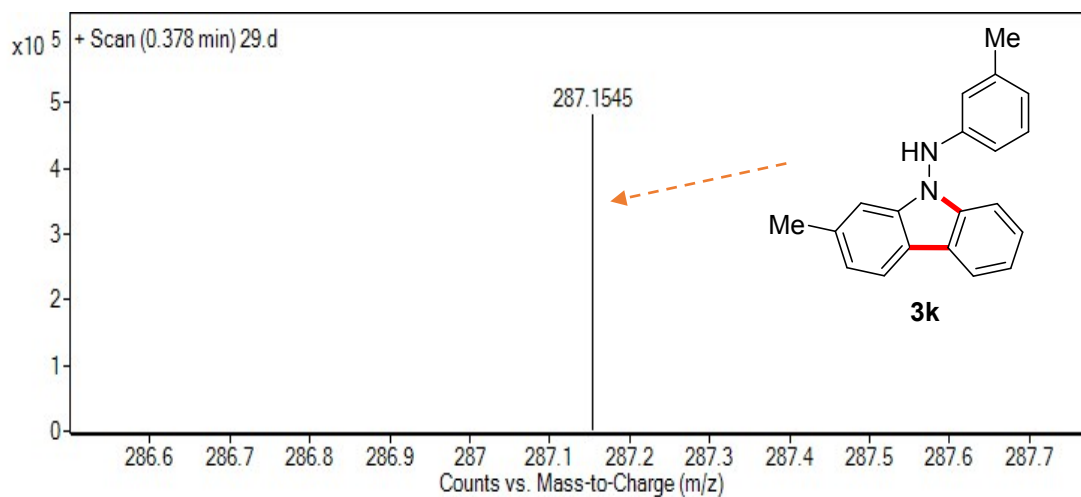

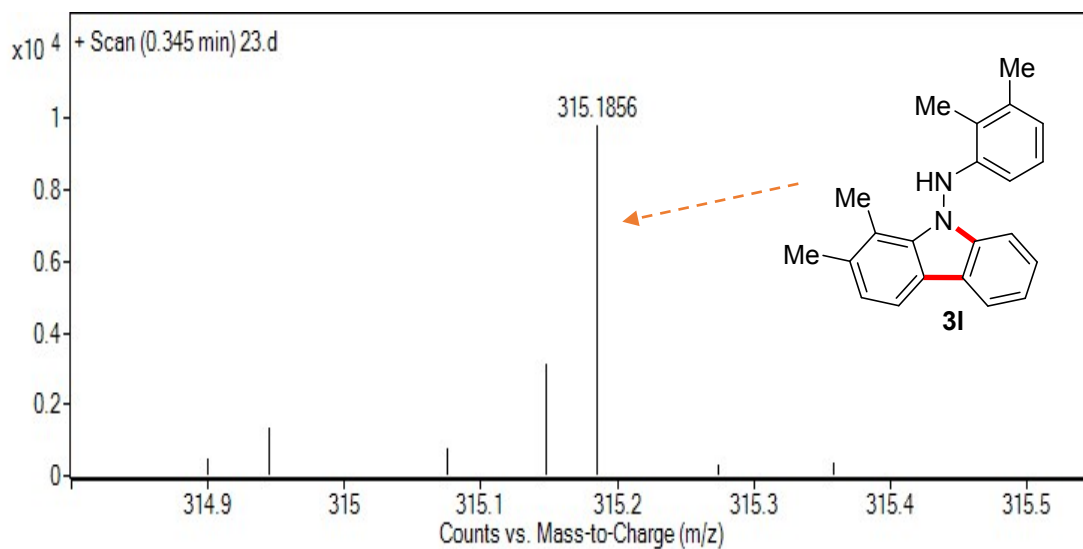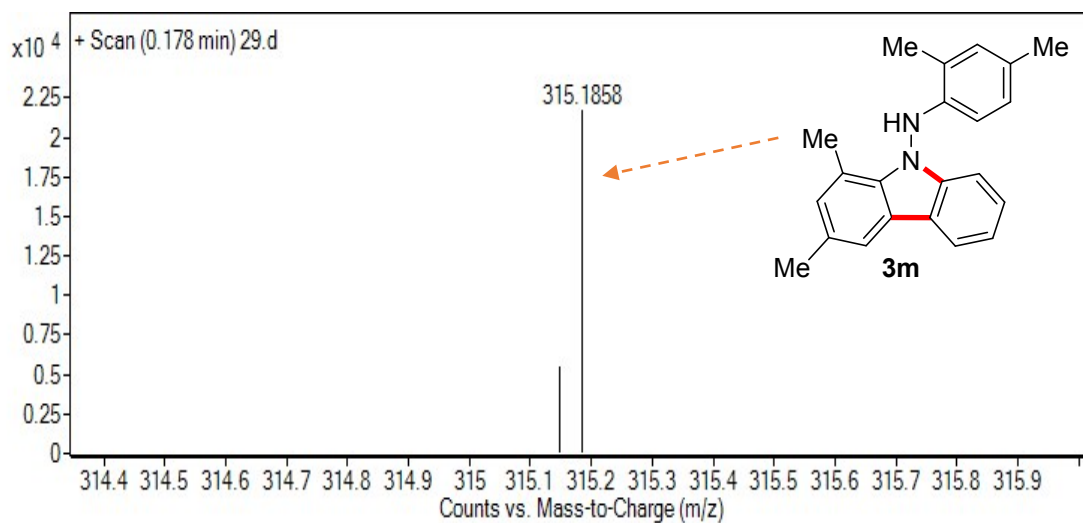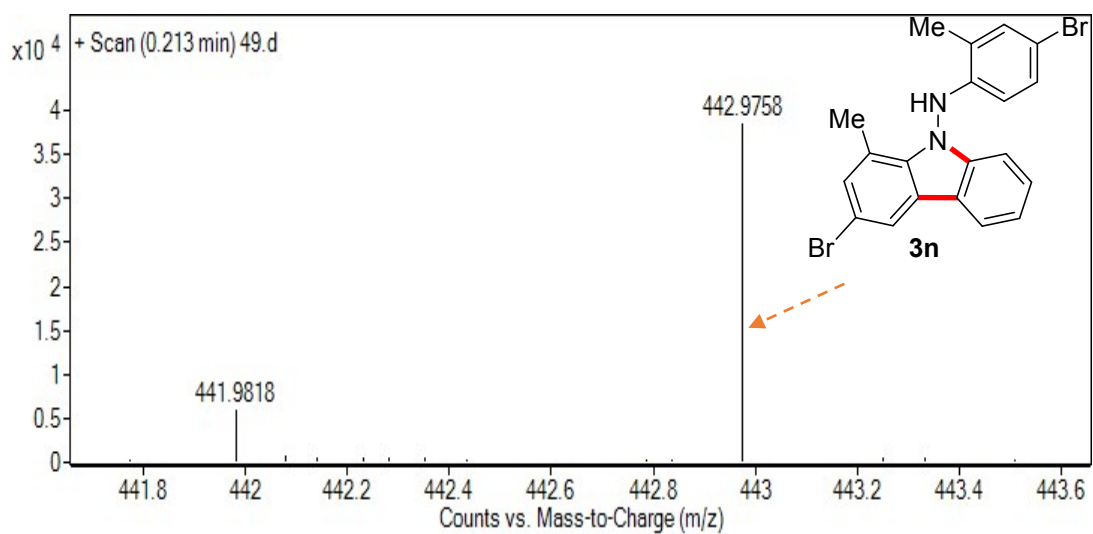

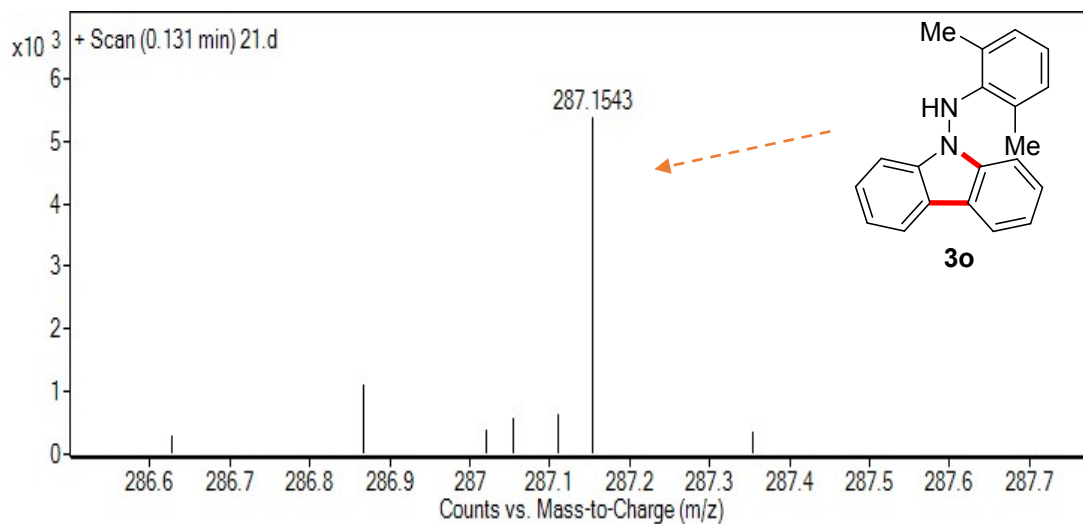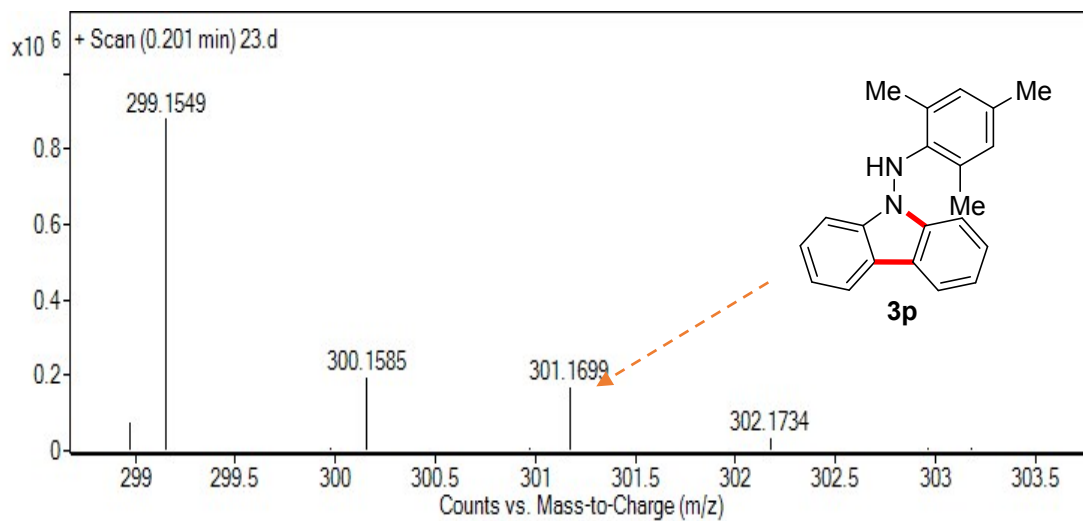

Operation Mode: ESI Positive Ion Mode

Elemental composition search on mass 331.14

m/z= 326.14-336.14

| m/z      | Theo. Mass | Delta (ppm) | RDB equiv. | Composition                                                   |
|----------|------------|-------------|------------|---------------------------------------------------------------|
| 331.1437 | 331.1441   | -1.10       | 13.5       | C <sub>21</sub> H <sub>19</sub> O <sub>2</sub> N <sub>2</sub> |
|          | 331.1428   | 2.95        | 14.0       | C <sub>19</sub> H <sub>17</sub> O N <sub>5</sub>              |

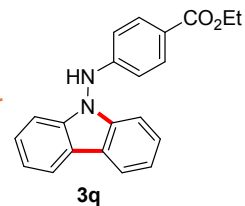

3#8 RT: 0.06 AV: 1 NL: 2.39E7  
T: FTMS + p ESI Full ms [100.0000-1000.0000]

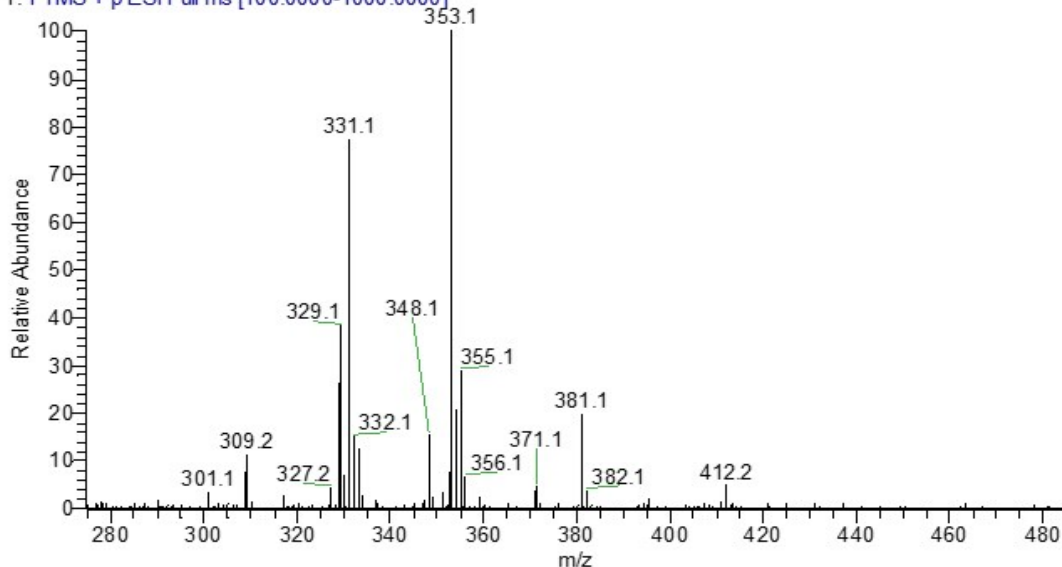

Operation Mode: ESI Positive Ion Mode

Elemental composition search on mass 335.15

m/z= 330.15-340.15

| m/z      | Theo. Mass | Delta (ppm) | RDB equiv. | Composition                                       |
|----------|------------|-------------|------------|---------------------------------------------------|
| 335.1540 | 335.1543   | -0.67       | 16.5       | C <sub>24</sub> H <sub>19</sub> N <sub>2</sub>    |
|          | 335.1553   | -3.83       | 1.5        | C <sub>12</sub> H <sub>28</sub> N <sub>6</sub> Br |

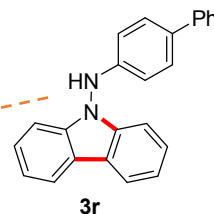

5 20200624132459#17 RT: 0.14 AV: 1 NL: 3.22E7  
T: FTMS + p ESI Full ms [100.0000-1000.0000]

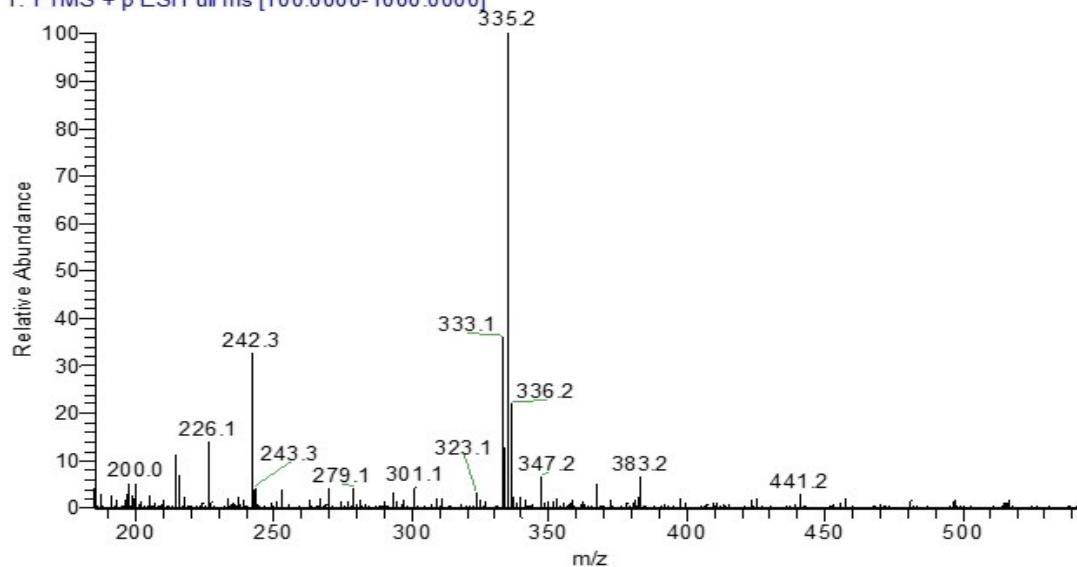

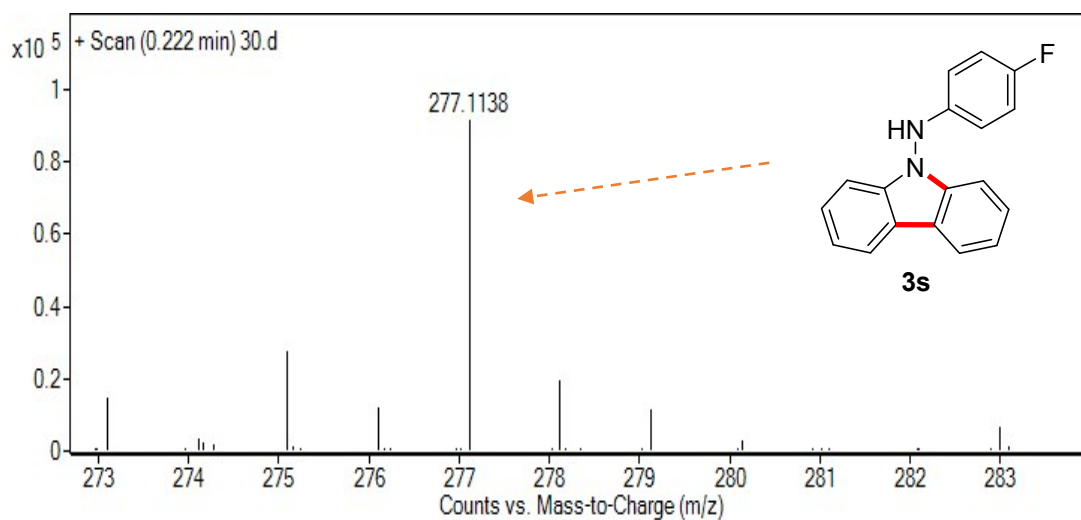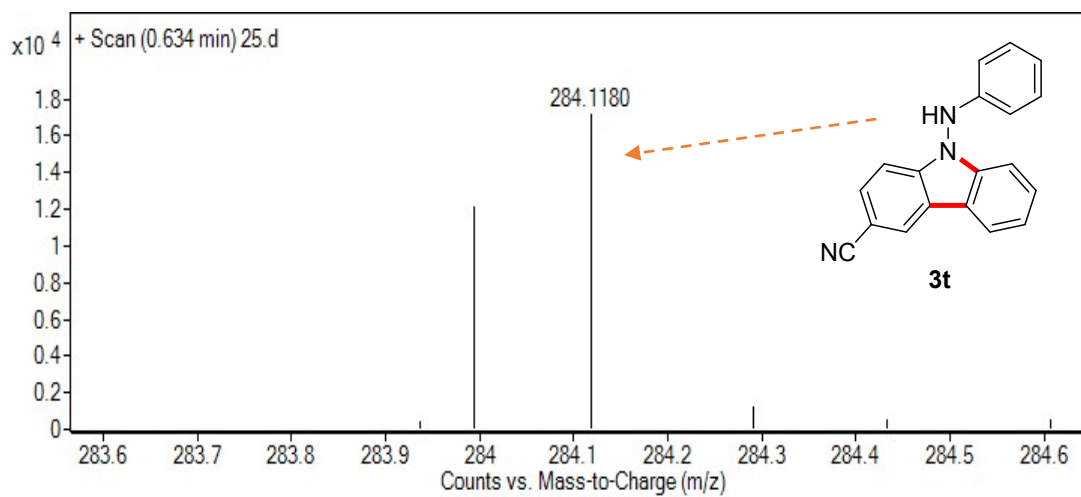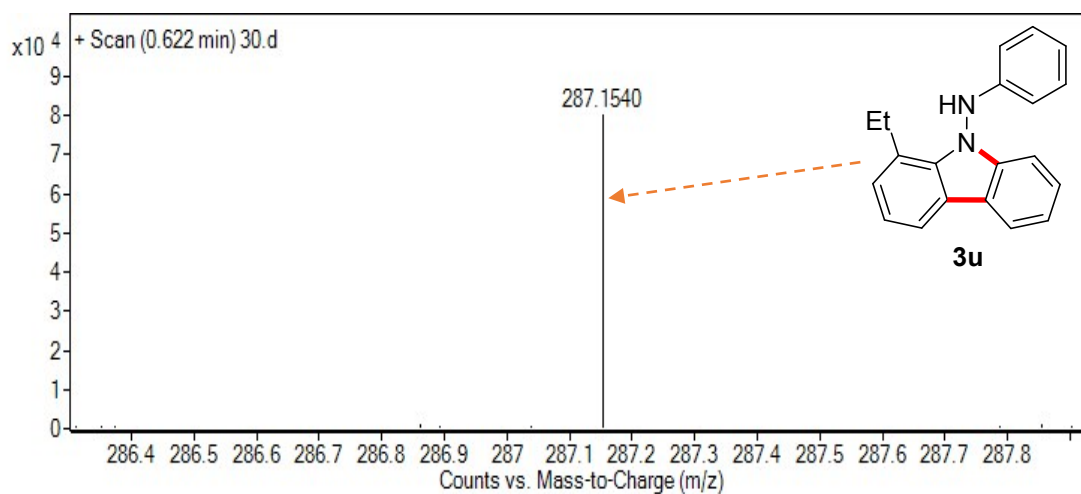

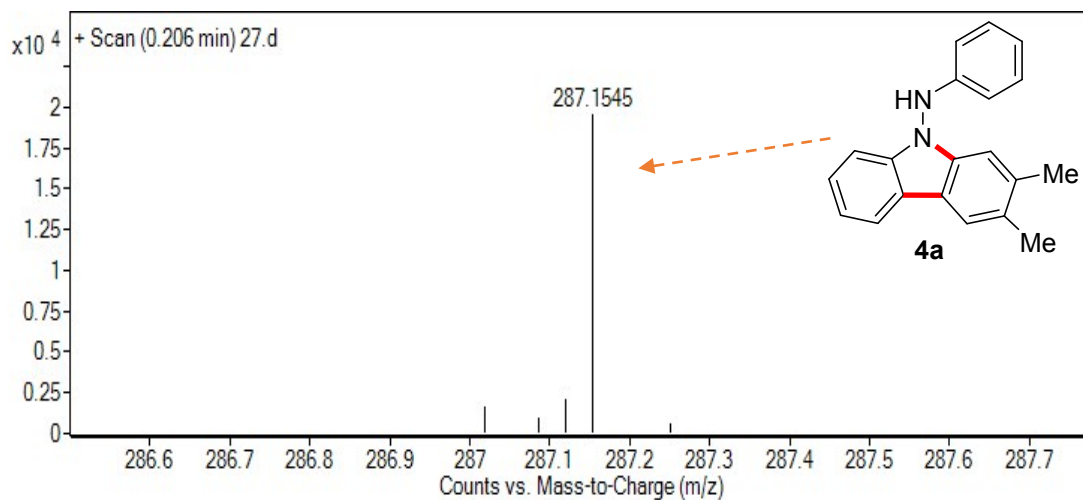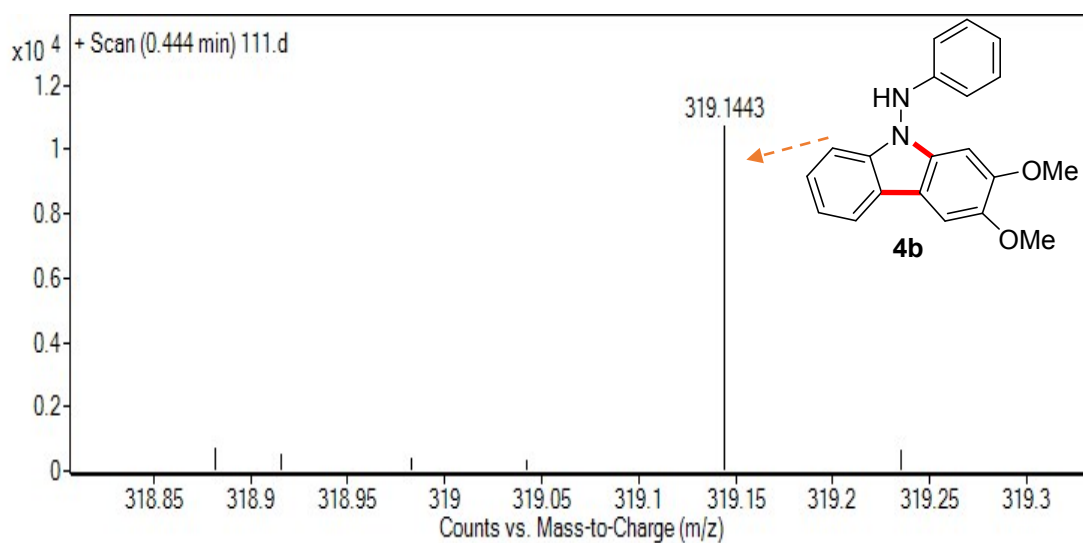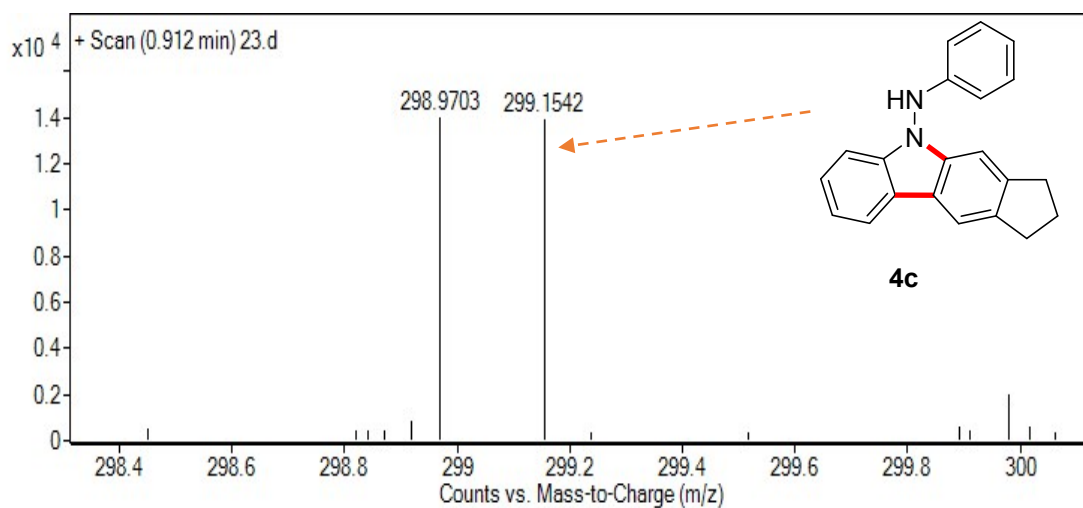



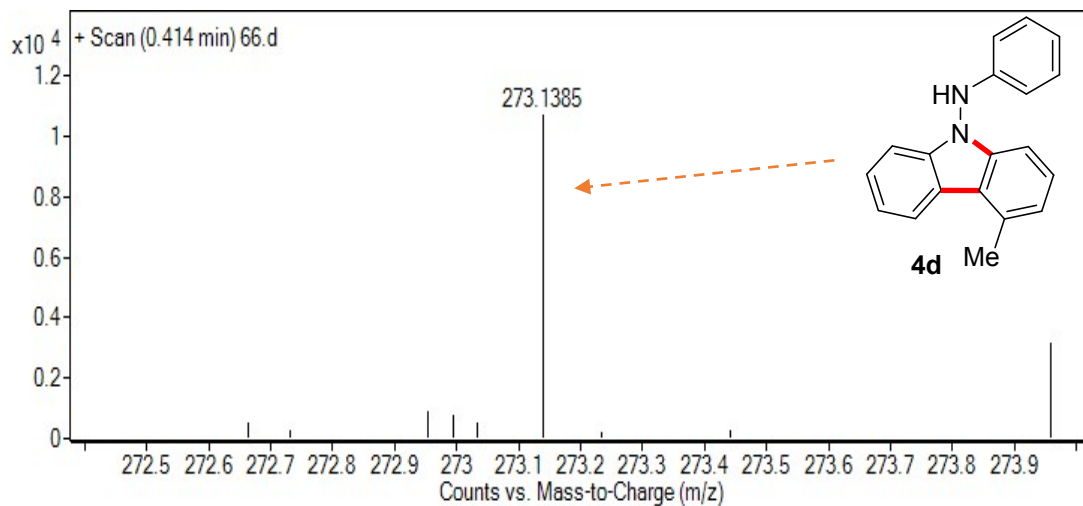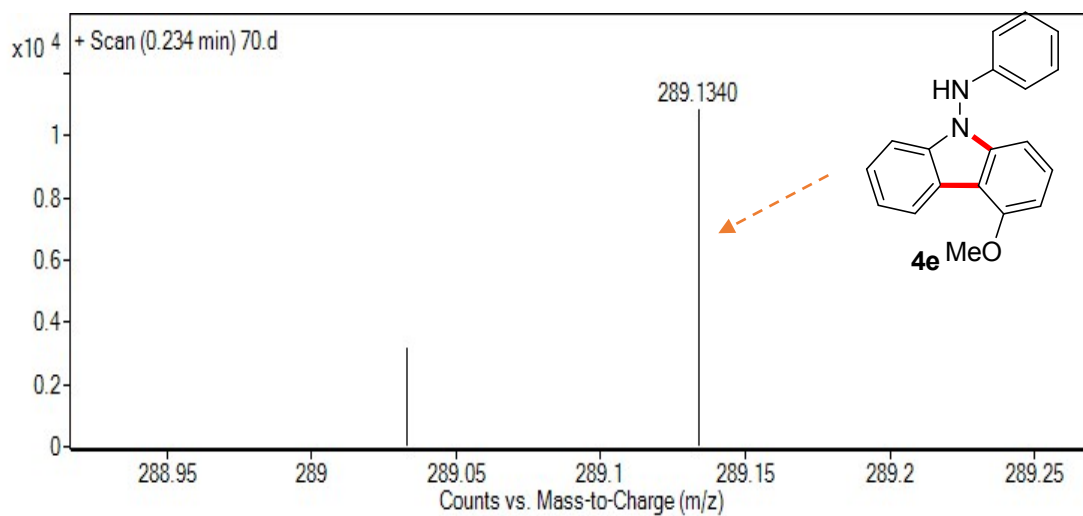

Operation Mode: ESI Positive Ion Mode

Elemental composition search on mass 335.15

m/z= 330.15-340.15

| m/z      | Theo. Mass | Delta (ppm) | RDB equiv. | Composition                                       |
|----------|------------|-------------|------------|---------------------------------------------------|
| 335.1541 | 335.1543   | -0.40       | 16.5       | C <sub>24</sub> H <sub>19</sub> N <sub>2</sub>    |
|          | 335.1553   | -3.56       | 1.5        | C <sub>12</sub> H <sub>28</sub> N <sub>6</sub> Br |

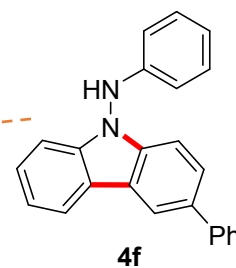

6\_20200624132709#26 RT: 0.22 AV: 1 NL: 1.21E7  
T: FTMS + p ESI Full ms [100.0000-1000.0000]

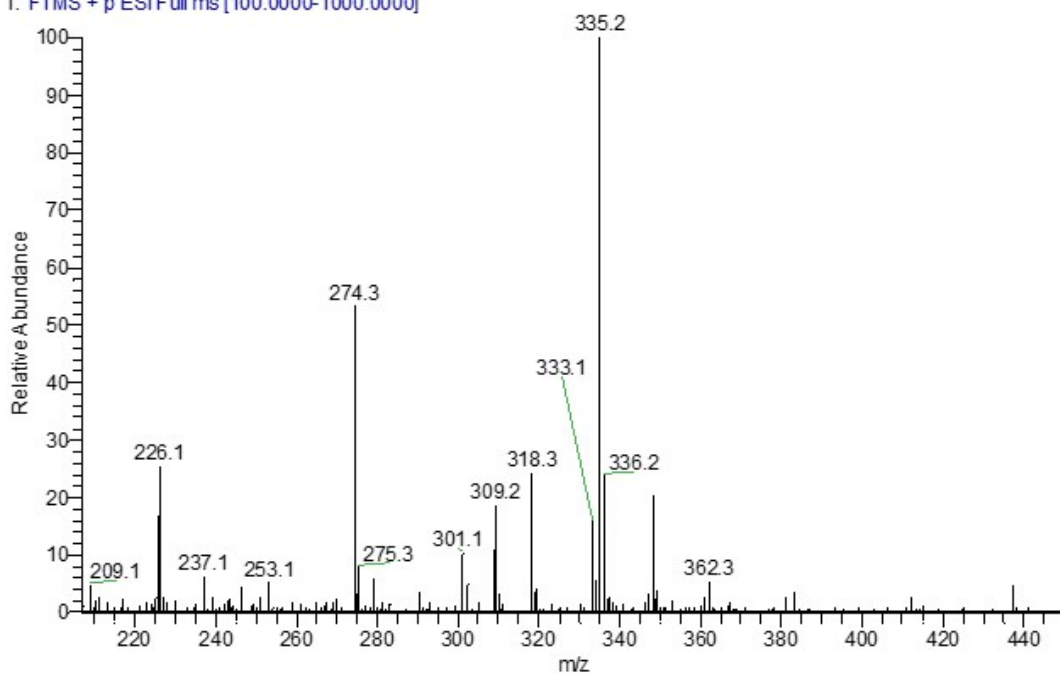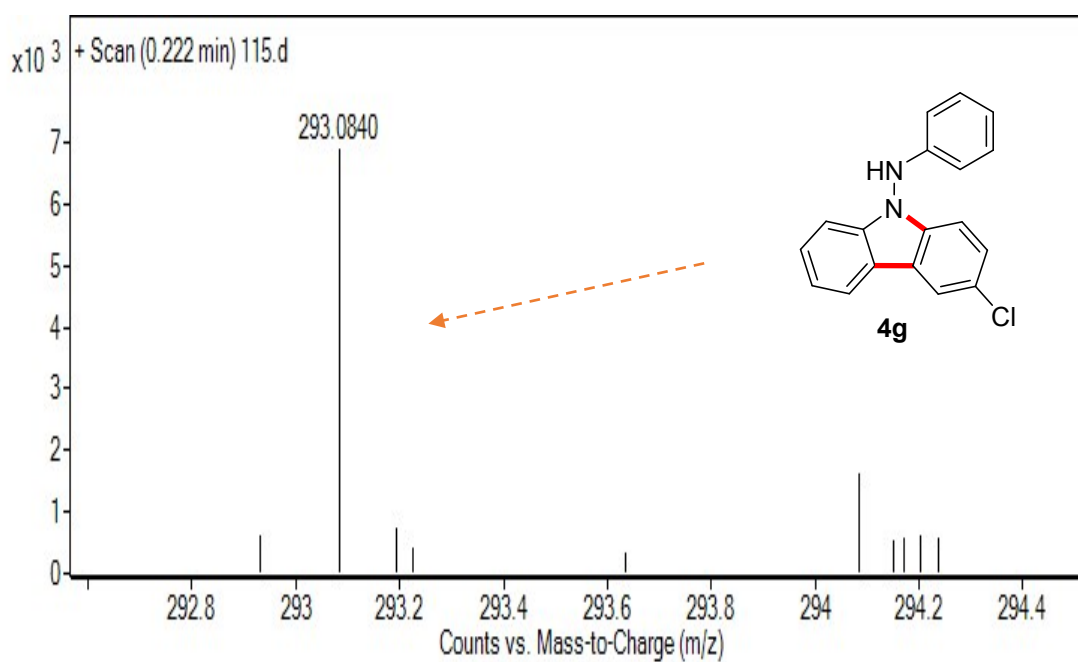

Operation Mode: ESI Positive Ion Mode

Elemental composition search on mass 309.14

m/z= 304.14-314.14

| m/z      | Theo. Mass | Delta (ppm) | RDB equiv. | Composition                                       |
|----------|------------|-------------|------------|---------------------------------------------------|
| 309.1383 | 309.1386   | -0.92       | 15.5       | C <sub>22</sub> H <sub>17</sub> N <sub>2</sub>    |
|          | 309.1397   | -4.35       | 0.5        | C <sub>10</sub> H <sub>26</sub> N <sub>6</sub> Br |

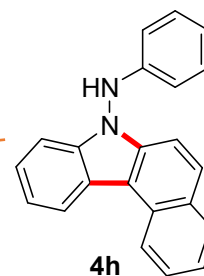

1\_20200624133801 #21 RT: 0.18 AV: 1 NL: 5.74E7  
T: FTMS + p ESI Full ms [100.0000-1000.0000]

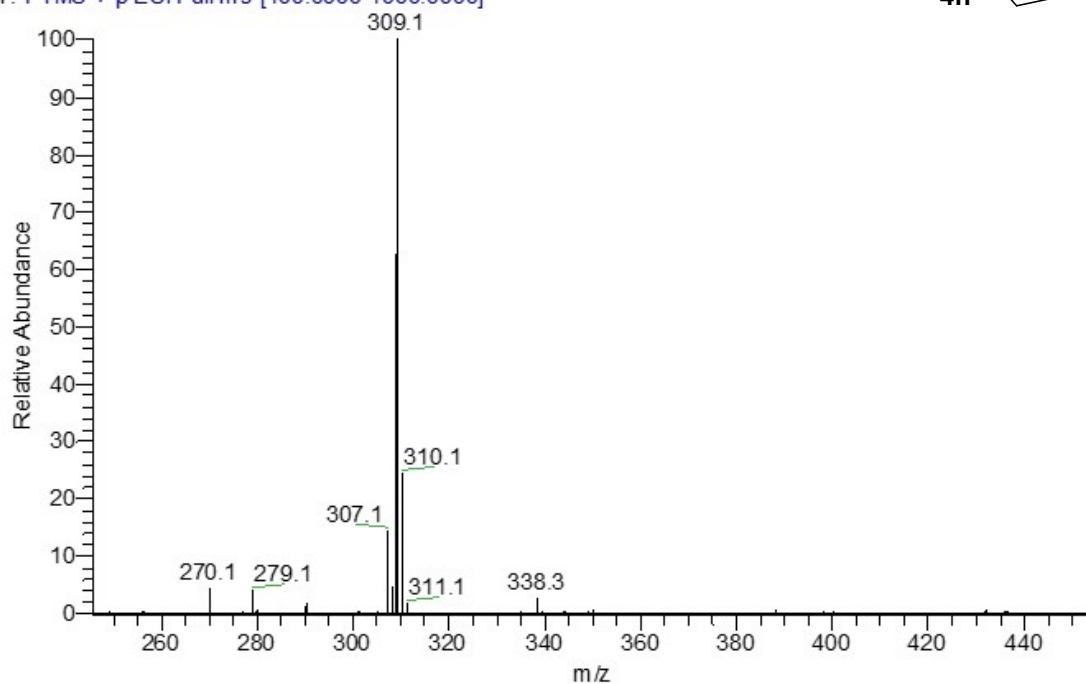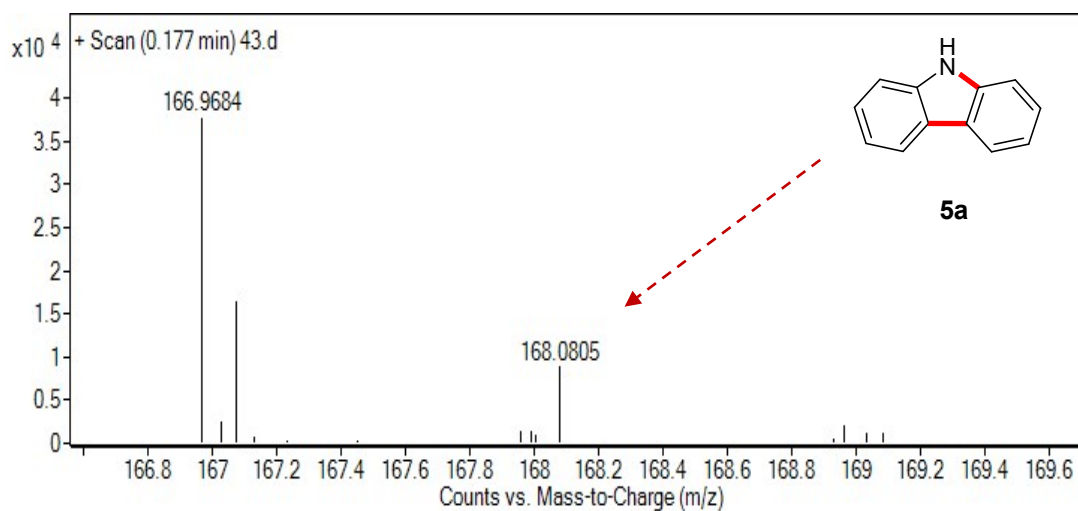

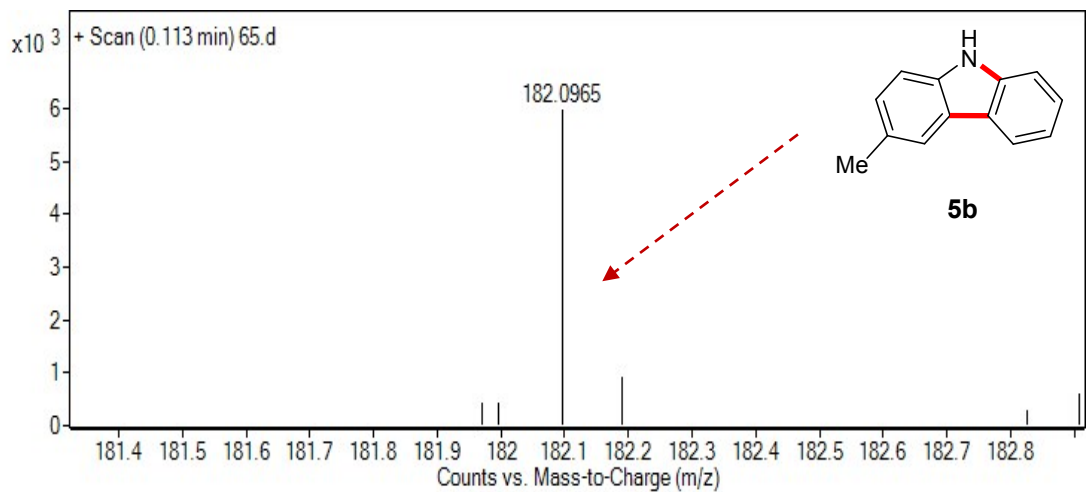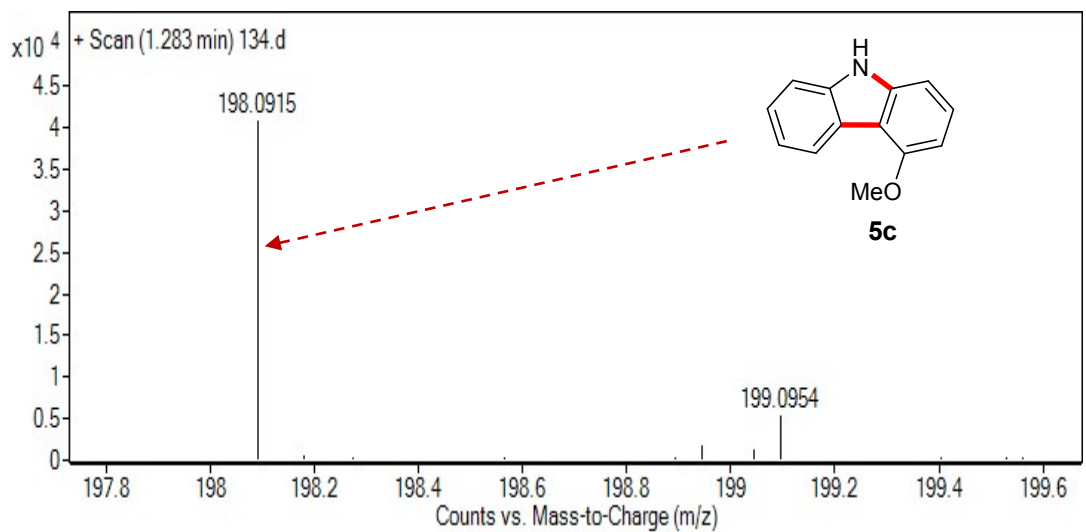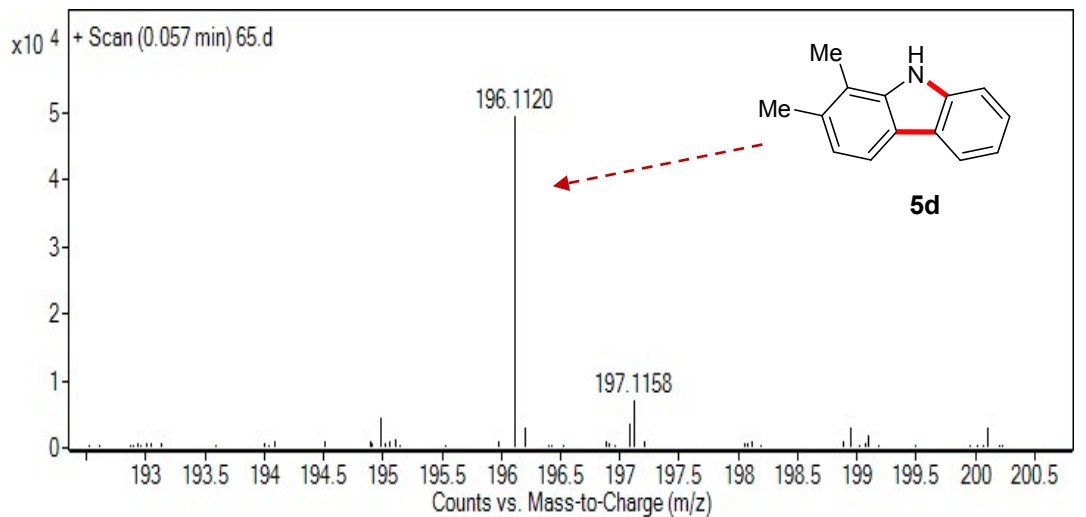

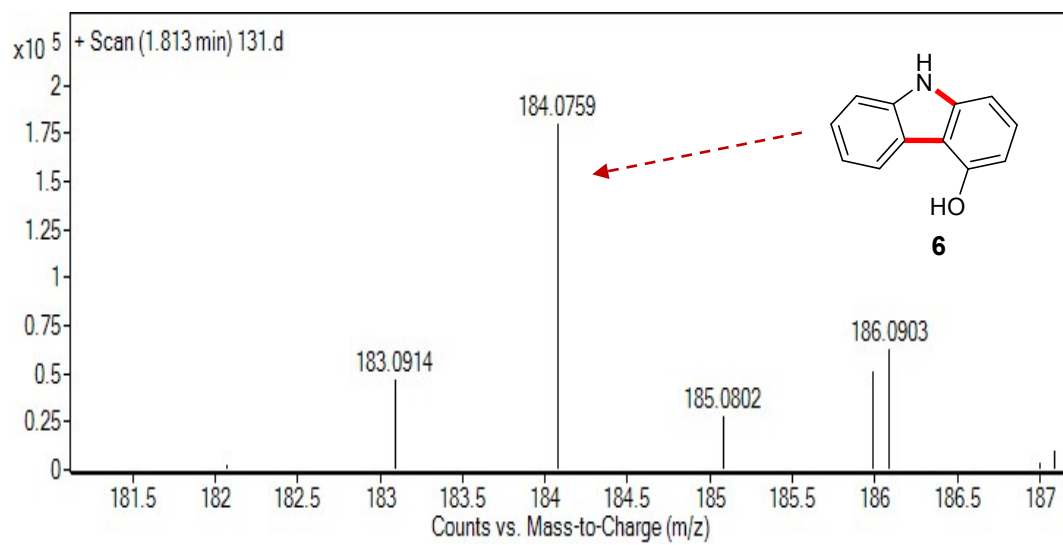

Supplement: d1qo00739d1.pdf [file d1qo00739d1.pdf]
